# Supplementary material for: Upfront whole blood transcriptional patterns in patients receiving immune checkpoint inhibitors associate with clinical outcome
Source: Research Square preprint supplement (doi:10.21203/rs.3.rs-6843569/v1), 2025-06-13
Supplement: Supplementary file 1 [file 337ee66855316816cd5679e9.xlsx]

## Sheet: Summary 18 TCs
REACTOME	Enrichment Z-score	GOBP	Enrichment Z-score	Top 10 genes weight >3 (ID)	Top 10 genes weight > (name)	Gene weight	Baseline WBC	Spearmans rho	p-value	WB cell expressing higher activity
TC6 - Platelet activation
SMOOTH_MUSCLE_CONTRACTION	6.25701	WOUND_HEALING	9.23853	ENSG00000005961.19	ITGA2B	24.4102	Hemoglobin	-0.331926	4.53132e-05	Megakaryocyte
FORMATION_OF_FIBRIN_CLOT_CLOTTING_CASCADE	6.11937	HEMOSTASIS	9.20734	ENSG00000259207.10	ITGB3	23.1256	Thrombocytes	0.373742	3.64913e-06
PLATELET_AGGREGATION_PLUG_FORMATION	5.98958	PLATELET_ACTIVATION	8.9905	ENSG00000101335.10	MYL9	22.2631	Basophils	-0.353105	0.0218041
INTEGRIN_CELL_SURFACE_INTERACTIONS	3.68314	REGULATION_OF_BODY_FLUID_LEVELS	8.03994	ENSG00000163736.4	PPBP	20.922	Erythrocytes	-0.354135	0.021396
CELL_SURFACE_INTERACTIONS_AT_THE_VASCULAR_WALL	5.23874	PLATELET_AGGREGATION	7.24414	ENSG00000173210.20	ABLIM3	20.7244
EXTRACELLULAR_MATRIX_ORGANIZATION	5.16511	REGULATION_OF_WOUND_HEALING	5.91406	ENSG00000161911.12	TREML1	20.1767
PLATELET_ADHESION_TO_EXPOSED_COLLAGEN	5.08636	REGULATION_OF_RESPONSE_TO_WOUNDING	5.48837	ENSG00000203618.6	GP1BB	19.9395
MUSCLE_CONTRACTION	4.99854	MEGAKARYOCYTE_DIFFERENTIATION	5.07367	ENSG00000113140.11	SPARC	19.5379
INTRINSIC_PATHWAY_OF_FIBRIN_CLOT_FORMATION	4.88879	NEGATIVE_REGULATION_OF_WOUND_HEALING	5.07367	ENSG00000204424.10	LY6G6F	18.9417
SYNDECAN_INTERACTIONS	3.74085	NEGATIVE_REGULATION_OF_COAGULATION	5.01245	ENSG00000166091.21	CMTM5	18.8302
TC7 - Immunoreglation thorugh interferon pathways signalling
INTERFERON_GAMMA_SIGNALING	8.32789	INTERFERON_MEDIATED_SIGNALING_PATHWAY	9.41285	ENSG00000134321.13	RSAD2	36.8265	Hemoglobin	-0.331906	4.53633e-05	CD4+ T cell
ANTIVIRAL_MECHANISM_BY_IFN_STIMULATED_GENES	8.12453	REGULATION_OF_RESPONSE_TO_BIOTIC_STIMULUS	9.25052	ENSG00000185745.10	IFIT1	35.3753	Lymphocytes	-0.434088	0.00407609	Mesenchymal stem cells
DDX58_IFIH1_MEDIATED_INDUCTION_OF_INTERFERON_ALPHA_BETA	5.02643	RESPONSE_TO_INTERFERON_BETA	8.80244	ENSG00000137959.17	IFI44L	31.4847	Eosinophils	0.331858	0.0317899
NEGATIVE_REGULATORS_OF_DDX58_IFIH1_SIGNALING	4.57444	CYTOKINE_MEDIATED_SIGNALING_PATHWAY	8.22951	ENSG00000088827.13	SIGLEC1	31.0169	Erythrocytes	-0.411751	0.00674332
MATURATION_OF__SARS_COV_1_NUCLEOPROTEIN	4.02514	NEGATIVE_REGULATION_OF_INNATE_IMMUNE_RESPONSE	7.4469	ENSG00000137965.11	IFI44	28.4899
REGULATION_OF_IFNA_IFNB_SIGNALING	3.95817	REGULATION_OF_TYPE_I_INTERFERON_MEDIATED_SIGNALING_PATHWAY	7.36667	ENSG00000126709.16	IFI6	28.2526
TRAF3_DEPENDENT_IRF_ACTIVATION_PATHWAY	3.83876	REGULATION_OF_RESPONSE_TO_CYTOKINE_STIMULUS	7.34592	ENSG00000134326.12	CMPK2	28.0361
SARS_COV_2_ACTIVATES_MODULATES_INNATE_AND_ADAPTIVE_IMMUNE_RESPONSES	3.82013	POSITIVE_REGULATION_OF_DEFENSE_RESPONSE	6.86133	ENSG00000157601.15	MX1	27.658
MATURATION_OF_SARS_COV_2_NUCLEOPROTEIN	3.78491	POSITIVE_REGULATION_OF_RESPONSE_TO_BIOTIC_STIMULUS	6.85932	ENSG00000138646.9	HERC5	27.207
TRAF6_MEDIATED_IRF7_ACTIVATION	3.73427	RESPONSE_TO_INTERFERON_ALPHA	6.67664	ENSG00000187608.10	ISG15	26.581
TC11 - Immunoreglation thorugh interferon pathways signalling
INTERFERON_SIGNALING	8.04578	DEFENSE_RESPONSE_TO_SYMBIONT	8.58956	ENSG00000010030.14	ETV7	28.9958	Hemoglobin	-0.339288	2.98338e-05	CD14+ monocytes type 1
INTERFERON_GAMMA_SIGNALING	7.66956	RESPONSE_TO_VIRUS	8.19991	ENSG00000168062.10	BATF2	27.834	Lymphocytes	-0.503222	0.000681696
INTERFERON_ALPHA_BETA_SIGNALING	6.04168	REGULATION_OF_RESPONSE_TO_BIOTIC_STIMULUS	7.92597	ENSG00000154451.15	GBP5	23.5926	Eosinophils	0.322024	0.0375503
SIGNALING_BY_INTERLEUKINS	4.73532	RESPONSE_TO_TYPE_II_INTERFERON	7.76008	ENSG00000225492.6	GBP1P1	22.6447	Erythrocytes	-0.450946	0.00272517
PROGRAMMED_CELL_DEATH	4.00388	CELLULAR_RESPONSE_TO_TYPE_II_INTERFERON	6.70451	ENSG00000152766.6	ANKRD22	22.1548
BUTYROPHILIN_BTN_FAMILY_INTERACTIONS	3.62457	REGULATION_OF_INNATE_IMMUNE_RESPONSE	6.50691	ENSG00000117228.11	GBP1	21.0958
REGULATION_OF_IFNA_IFNB_SIGNALING	3.55437	IMMUNE_RESPONSE_REGULATING_SIGNALING_PATHWAY	6.0086	ENSG00000265531.3	FCGR1CP	20.6184
CROSS_PRESENTATION_OF_SOLUBLE_EXOGENOUS_ANTIGENS_ENDOSOMES	3.51486	ACTIVATION_OF_IMMUNE_RESPONSE	5.7456	ENSG00000150337.14	FCGR1A	19.997
INTERLEUKIN_1_FAMILY_SIGNALING	3.34663	NEGATIVE_REGULATION_OF_INNATE_IMMUNE_RESPONSE	5.66609	ENSG00000149131.17	SERPING1	18.1592
REGULATED_NECROSIS	3.17693	NEGATIVE_REGULATION_OF_RESPONSE_TO_BIOTIC_STIMULUS	5.6659	ENSG00000197646.8	PDCD1LG2	16.7276
TC19 - Erythrocyte metabolism and immunoregulation
ANTIGEN_PROCESSING_UBIQUITINATION_PROTEASOME_DEGRADATION	5.35593	PROTEASOMAL_PROTEIN_CATABOLIC_PROCESS	6.62424	ENSG00000183508.5	TENT5C	18.2505	Hemoglobin	-0.374397	3.4979e-06	Erythroid cell type 1 and 2
CYCLIN_D_ASSOCIATED_EVENTS_IN_G1	4.67204	PROTEIN_POLYUBIQUITINATION	4.69651	ENSG00000057757.10	PITHD1	17.8917	Basophils	-0.319867	0.0389216	Megakaryocyte
CLASS_I_MHC_MEDIATED_ANTIGEN_PROCESSING_PRESENTATION	4.6576	HEMOGLOBIN_METABOLIC_PROCESS	4.49988	ENSG00000180667.11	YOD1	17.0314
DNA_DAMAGE_RECOGNITION_IN_GG_NER	4.48569	AUTOPHAGY_OF_MITOCHONDRION	4.42874	ENSG00000101782.15	RIOK3	15.4278
ONCOGENE_INDUCED_SENESCENCE	4.13107	ORGANELLE_DISASSEMBLY	4.31698	ENSG00000066926.13	FECH	14.997
NEF_MEDIATES_DOWN_MODULATION_OF_CELL_SURFACE_RECEPTORS_BY_RECRUITING_THEM_TO_CLATHRIN_ADAPTERS	4.09693	PROTEIN_K48_LINKED_UBIQUITINATION	4.08441	ENSG00000172331.12	BPGM	14.6051
HOST_INTERACTIONS_OF_HIV_FACTORS	4.059	POSTSYNAPTIC_NEUROTRANSMITTER_RECEPTOR_INTERNALIZATION	4.04056	ENSG00000145354.12	CISD2	13.7699
RETROGRADE_NEUROTROPHIN_SIGNALLING	4.01005	HEMOGLOBIN_BIOSYNTHETIC_PROCESS	4.01005	ENSG00000152484.14	USP12	13.5493
NEDDYLATION	4.00149	REGULATION_OF_PROTEASOMAL_PROTEIN_CATABOLIC_PROCESS	3.94632	ENSG00000133606.11	MKRN1	13.0058
IRON_UPTAKE_AND_TRANSPORT	3.94984	REGULATION_OF_TRANSLATIONAL_INITIATION	3.82251	ENSG00000153574.9	RPIA	12.9334
TC28 - PPP1R10
None		POSITIVE_REGULATION_OF_ORGANELLE_ORGANIZATION	3.35014	ENSG00000231737.7	PPP1R10	50.2562	No significant correlations			No cell type with distinctly higher activity
		POSITIVE_REGULATION_OF_CILIUM_MOVEMENT	3.24489	ENSG00000235291.7	PPP1R10	50.2562
		POSITIVE_REGULATION_OF_RENAL_SODIUM_EXCRETION	3.24489	ENSG00000230995.7	PPP1R10	50.2369
		UTERINE_SMOOTH_MUSCLE_CONTRACTION	3.24489	ENSG00000238104.7	PPP1R10	50.2369
		INSEMINATION	3.21767	ENSG00000227804.7	PPP1R10	50.2369
		POSITIVE_REGULATION_OF_SYNAPTIC_TRANSMISSION_GABAERGIC	3.16947	ENSG00000206489.9	PPP1R10	46.8297
		RENAL_SODIUM_EXCRETION	3.10868	ENSG00000211843.1	TACR1	3.40326
		BEHAVIORAL_RESPONSE_TO_PAIN	3.10868	ENSG00000243710.8	CFAP57	-3.1562
		REGULATION_OF_FLAGELLATED_SPERM_MOTILITY	3.10868	ENSG00000204569.10	PPP1R10	-40.5288
		POSITIVE_REGULATION_OF_DIGESTIVE_SYSTEM_PROCESS	3.10868
TC73 - B cell activation
ANTIGEN_ACTIVATES_B_CELL_RECEPTOR_BCR_LEADING_TO_GENERATION_OF_SECOND_MESSENGERS	5.00371	B_CELL_ACTIVATION	7.97689	ENSG00000100721.11	TCL1A	27.6149	Hemoglobin	0.228153	0.0057794	Memory B cell
SIGNALING_BY_THE_B_CELL_RECEPTOR_BCR	3.78852	B_CELL_RECEPTOR_SIGNALING_PATHWAY	6.20297	ENSG00000211898.8	IGHD	25.4216	Lymphocytes	0.309519	0.0460801	Naive B cell
IMMUNOREGULATORY_INTERACTIONS_BETWEEN_A_LYMPHOID_AND_A_NON_LYMPHOID_CELL	3.51311	B_CELL_PROLIFERATION	6.13794	ENSG00000278801.3	IGHD	25.4216	Monocytes	-0.380427	0.0129448
TNF_RECEPTOR_SUPERFAMILY_TNFSF_MEMBERS_MEDIATING_NON_CANONICAL_NF_KB_PATHWAY	3.399	IMMUNE_RESPONSE_REGULATING_CELL_SURFACE_RECEPTOR_SIGNALING_PATHWAY	5.70822	ENSG00000156738.18	MS4A1	22.7655	Erythrocytes	0.464822	0.00192635
L1CAM_INTERACTIONS	3.23203	IMMUNE_RESPONSE_REGULATING_SIGNALING_PATHWAY	5.41478	ENSG00000128218.8	VPREB3	22.4958
		B_CELL_DIFFERENTIATION	5.30487	ENSG00000177455.15	CD19	21.7872
		ANTIGEN_RECEPTOR_MEDIATED_SIGNALING_PATHWAY	5.12461	ENSG00000012124.17	CD22	21.5536
		ACTIVATION_OF_IMMUNE_RESPONSE	4.58428	ENSG00000132185.18	FCRLA	21.1011
		LEUKOCYTE_PROLIFERATION	4.58065	ENSG00000196092.14	PAX5	20.8597
		REGULATION_OF_B_CELL_ACTIVATION	4.51494	ENSG00000105369.10	CD79A	18.9427
TC100 - Leukocyte activation
IMMUNOREGULATORY_INTERACTIONS_BETWEEN_A_LYMPHOID_AND_A_NON_LYMPHOID_CELL	6.3678	NATURAL_KILLER_CELL_MEDIATED_IMMUNITY	7.52186	ENSG00000137441.8	FGFBP2	24.4941	Hemoglobin	0.162104	0.0514142	Natural killer cell type 1
GPCR_LIGAND_BINDING	3.86462	LEUKOCYTE_MEDIATED_IMMUNITY	7.42359	ENSG00000100450.13	GZMH	23.6801	Neutrophils	-0.526256	0.000344019	Cytotoxic T cell type 1 and 2
GENERATION_OF_SECOND_MESSENGER_MOLECULES	3.32413	CELL_KILLING	7.11103	ENSG00000176083.18	ZNF683	21.3867	Lymphocytes	0.430198	0.00446034
CLASS_A_1_RHODOPSIN_LIKE_RECEPTORS	3.31825	LEUKOCYTE_MEDIATED_CYTOTOXICITY	7.09672	ENSG00000162383.13	SLC1A7	21.3848
O_GLYCOSYLATION_OF_TSR_DOMAIN_CONTAINING_PROTEINS	3.26058	ADAPTIVE_IMMUNE_RESPONSE	7.06426	ENSG00000181036.14	FCRL6	19.3563
		LYMPHOCYTE_MEDIATED_IMMUNITY	6.98056	ENSG00000180739.15	S1PR5	17.6968
		POSITIVE_REGULATION_OF_NATURAL_KILLER_CELL_MEDIATED_IMMUNITY	6.44728	ENSG00000205336.14	ADGRG1	17.295
		T_CELL_DIFFERENTIATION	6.34584	ENSG00000113721.14	PDGFRB	17.0262
		CYTOLYSIS	6.17883	ENSG00000115523.17	GNLY	16.7682
		NATURAL_KILLER_CELL_ACTIVATION	6.15652	ENSG00000109956.13	B3GAT1	16.0838
TC525 - IL4, 10 and 13 mediated immunoregulation
INTERLEUKIN_10_SIGNALING	6.1713	REGULATION_OF_INFLAMMATORY_RESPONSE	8.2299	ENSG00000162551.14	ALPL	16.3247	Hemoglobin	-0.179534	0.0307149	CD14+ monocyte type 1
SIGNALING_BY_INTERLEUKINS	6.03858	POSITIVE_REGULATION_OF_DEFENSE_RESPONSE	8.17852	ENSG00000163421.9	PROK2	15.8152	Neutrophils	0.667504	1.37639e-06
CLASS_A_1_RHODOPSIN_LIKE_RECEPTORS	5.75046	LEUKOCYTE_MIGRATION	8.02559	ENSG00000102010.15	BMX	14.1201	Lymphocytes	-0.359525	0.0193631
REGULATION_OF_TLR_BY_ENDOGENOUS_LIGAND	5.6827	LEUKOCYTE_CHEMOTAXIS	7.9511	ENSG00000167434.10	CA4	13.8681	Unripe granulocytes	0.438664	0.00366144
IRAK4_DEFICIENCY_TLR2_4	5.6827	NEUTROPHIL_MIGRATION	7.82929	ENSG00000257335.8	MGAM	13.4915	Erythrocytes	-0.323785	0.0364601
DISEASES_OF_IMMUNE_SYSTEM	5.36723	MYELOID_LEUKOCYTE_MIGRATION	7.68797	ENSG00000138772.13	ANXA3	13.4506
RHO_GTPASES_ACTIVATE_NADPH_OXIDASES	4.56012	CELL_CHEMOTAXIS	7.4474	ENSG00000196549.13	MME	13.3153
INTERLEUKIN_4_AND_INTERLEUKIN_13_SIGNALING	4.52881	NEUTROPHIL_CHEMOTAXIS	7.38532	ENSG00000100985.7	MMP9	13.1734
PEPTIDE_LIGAND_BINDING_RECEPTORS	4.31077	GRANULOCYTE_MIGRATION	7.33363	ENSG00000163464.8	CXCR1	13.0878
TOLL_LIKE_RECEPTOR_CASCADES	4.23586	POSITIVE_REGULATION_OF_CYTOKINE_PRODUCTION	7.15145	ENSG00000180871.8	CXCR2	12.8416
TC671 - GPANK1
None		None		ENSG00000228605	GPANK1	92.9454	No significant correlations			No cell type with distinctly higher activity
				ENSG00000206408	GPANK1	92.9454
				ENSG00000206406	CSNK2B	17.3145
				ENSG00000241713	LY6G5B	6.08842
				ENSG00000225164	PRRC2A	5.00759
TC792 - Erythrocyte development
ERYTHROCYTES_TAKE_UP_CARBON_DIOXIDE_AND_RELEASE_OXYGEN	4.89669	ERYTHROCYTE_HOMEOSTASIS	7.66684	ENSG00000158578.21	ALAS2	35.1385	Hemoglobin	-0.345825	2.04018e-05	Eryhtroid cells type 1 and 2
METABOLISM_OF_PORPHYRINS	3.48318	ERYTHROCYTE_DEVELOPMENT	7.51019	ENSG00000133742.14	CA1	30.677
INTERACTION_BETWEEN_L1_AND_ANKYRINS	3.23682	MYELOID_CELL_HOMEOSTAS	7.24575	ENSG00000143416.21	SELENBP1	29.3591
		HOMEOSTASIS_OF_NUMBER_CELLS	6.4464	ENSG00000004939.16	SLC4A1	28.2055
		MYELOID_CELL_DEVELOPMENG	6.35529	ENSG00000167768.4	KRT1	26.6727
		GAS_TRANSPORT	6.10499	ENSG00000145335.17	SNCA	26.6679
		MYELOID_CELL_DIFFERENT	5.70752	ENSG00000238243.3	OR2W3	25.8916
		OXYGEN_TRANSPORT	4.82495	ENSG00000204010.3	IFIT1B	25.4331
		TETRAPYRROLE_BIOSYNTHE	4.65664	ENSG00000166947.15	EPB42	24.905
		ERYTHROCYTE_MATURATION	4.63855	ENSG00000169877.10	AHSP	23.5245
TC793 - Erythrocyte metabolism and immunoregulation
VLDLR_INTERNALISATION_AND_DEGRADATION	3.97924	CELLULAR_COMPONENT_DISASSEMBLY	4.85077	ENSG00000167992.14	VWCE	23.2631	Hemoglobin	-0.277853	0.000715123	Eryhtroid cells type 1 and 2
TRANSCRIPTIONAL_ACTIVITY_OF_SMAD2_SMAD3_SMAD4_HETEROTRIMER	3.90945	HYDROGEN_PEROXIDE_CATABOLIC_PROCESS	4.74989	ENSG00000136732.16	GYPC	19.4944	Erythrocytes	-0.421732	0.00540712
IRON_UPTAKE_AND_TRANSPORT	3.85633	HYDROGEN_PEROXIDE_METABOLIC_PROCESS	4.57214	ENSG00000167671.12	UBXN6	18.2844
SIGNALING_BY_TGF_BETA_RECEPTOR_COMPLEX	3.54923	ERYTHROCYTE_DEVELOPMENT	4.34148	ENSG00000162366.8	PDZK1IP1	17.4835
JOSEPHIN_DOMAIN_DUBS	3.50339	CELLULAR_RESPONSE_TO_TOXIC_SUBSTANCE	4.15534	ENSG00000167705.12	RILP	16.1675
UPTAKE_AND_FUNCTION_OF_ANTHRAX_TOXINS	3.50339	ORGANELLE_DISASSEMBLY	4.12992	ENSG00000095932.7	SMIM24	16.1341
TGF_BETA_RECEPTOR_SIGNALING_ACTIVATES_SMADS	3.49508	GAS_TRANSPORT	3.97924	ENSG00000108309.14	RUNDC3A	16.0295
CELLULAR_RESPONSE_TO_CHEMICAL_STRESS	3.47244	IRON_ION_TRANSPORT	3.88267	ENSG00000240583.14	AQP1	15.9305
ERYTHROCYTES_TAKE_UP_CARBON_DIOXIDE_AND_RELEASE_OXYGEN	3.42895	PROTEASOMAL_PROTEIN_CATABOLIC_PROCESS	3.85944	ENSG00000143774.17	GUK1	15.8583
FLT3_SIGNALING_IN_DISEASE	3.39826	CELLULAR_OXIDANT_DETOXIFICATION	3.62048	ENSG00000136840.19	ST6GALNAC4	15.6167
TC849 - Immunoregulation
NEGATIVE_REGULATION_OF_THE_PI3K_AKT_NETWORK	3.42057	NEGATIVE_REGULATION_OF_IMMUNE_SYSTEM_PROCESS	5.52852	ENSG00000109321.11	AREG	29.4534	Leukocytes	0.271875	0.00093962	No cell type with distinctly higher activity
NUCLEOTIDE_LIKE_PURINERGIC_RECEPTORS	3.2716	POSITIVE_REGULATION_OF_CYTOKINE_PRODUCTION	5.24799	ENSG00000179094.16	PER1	22.2958	Neutrophils	0.317747	0.0403086
ONCOGENE_INDUCED_SENESCENC	3.26645	CYTOKINE_MEDIATED_SIGNALING_PATHWAY	5.15101	ENSG00000121933.19	TMIGD3	20.733
INTERLEUKIN_7_SIGNALING	3.23395	REGULATION_OF_LYMPHOCYTE_ACTIVATION	4.97504	ENSG00000168209.6	DDIT4	19.6183
NPAS4_REGULATES_EXPRESSION_OF_TARGET_GENES	3.06375	LEUKOCYTE_PROLIFERATION	4.82259	ENSG00000096060.15	FKBP5	18.7617
PI3K_AKT_SIGNALING_IN_CANCER	3.05822	NEGATIVE_REGULATION_OF_LOCOMOTION	4.77826	ENSG00000134463.15	ECHDC3	18.2821
		POSITIVE_REGULATION_OF_DEFENSE_RESPONSE	4.417	ENSG00000109906.15	ZBTB16	17.7022
		REGULATION_OF_MACROPHAGE_MIGRATION	4.36093	ENSG00000179593.16	ALOX15B	16.7338
		REGULATION_OF_P38MAPK_CASCADE	4.29343	ENSG00000164105.4	SAP30	15.2622
		NEGATIVE_REGULATION_OF_NF_KAPPAB_TRANSCRIPTION_FACTOR_ACTIVITY	4.28426	ENSG00000115590.14	IL1R2	14.6468
TC865 - LTA
RHOBTB2_GTPASE_CYCLE	-3.20474	REGULATION_OF_DNA_DAMAGE_CHECKPOINT	-3.18066	ENSG00000238130.8	LTA	129.001	No significant correlations			No cell type with distinctly higher activity
				ENSG00000225073.10	DDX39B	39.5068
				ENSG00000227587.2	ATP6V1G2	13.08
				ENSG00000206433.10	LST1	4.44991
				ENSG00000225859.10	DDX39B	-3.35696
TC1093 - HLA-A
None		None		ENSG00000224320.9	HLA-A	99.0041	No significant correlations			No cell type with distinctly higher activity
				ENSG00000229215.9	HLA-A	99.0041
				ENSG00000206341.7	HLA-H	8.24939
				ENSG00000223708.1	Unknown	6.53161
				ENSG00000234831.1	Unknown	6.53161
				ENSG00000229390.1	MICD	6.2456
				ENSG00000224859.6	POLR1H	5.88622
				ENSG00000227858.1	ZFP57	4.27446
				ENSG00000228029.1	HLA-W	3.77617
				ENSG00000230795.3	HLA-K	-5.10867
TC1125 - PPP1R18
None		None		ENSG00000225060.8	PPP1R18	99.1903	No significant correlations			No cell type with distinctly higher activity
				ENSG00000229998.8	PPP1R18	99.1903
				ENSG00000206485.10	PPP1R18	9.85055
				ENSG00000226882.9	GNL1	4.12264
				ENSG00000225589.9	MDC1	-9.67413
				ENSG00000234012.9	MDC1	-9.67413
TC1151 - Immune cell migration
ANTIMICROBIAL_PEPTIDES	3.9057	NEUTROPHIL_MIGRATION	5.07325	ENSG00000100985.7	MMP9	25.7074	Basophils	-0.327078	0.0344915	CD14+ monocyte type 1
FORMATION_OF_THE_CORNIFIED_ENVELOPE	3.58343	GRANULOCYTE_MIGRATION	4.67949	ENSG00000102010.15	BMX	19.8222				Mesenchymal stem cells
BIOLOGICAL_OXIDATIONS	3.58325	LEUKOCYTE_ACTIVATION	4.51328	ENSG00000125780.12	TGM3	19.2173
SYNTHESIS_OF_LEUKOTRIENES_LT_AND_EOXINS_EX	3.57501	NEUTROPHIL_CHEMOTAXIS	4.26092	ENSG00000008438.5	PGLYRP1	16.0186
KERATINIZATION	3.53093	MYELOID_LEUKOCYTE_MIGRATION	4.00648	ENSG00000280908.2	PADI4	15.2756
EICOSANOIDS	3.28403	REGULATION_OF_NEUTROPHIL_MIGRATION	3.93839	ENSG00000159339.13	PADI4	15.2756
PHASE_I_FUNCTIONALIZATION_OF_COMPOUNDS	3.27656	DEFENSE_RESPONSE_TO_FUNGUS	3.9057	ENSG00000186529.16	CYP4F3	14.8315
DISSOLUTION_OF_FIBRIN_CLOT	3.21306	GRANULOCYTE_CHEMOTAXIS	3.89616	ENSG00000167434.10	CA4	14.5102
FATTY_ACIDS	3.14692	NEUROTRANSMITTER_SECRETION	3.89226	ENSG00000196549.13	MME	13.9122
COMMON_PATHWAY_OF_FIBRIN_CLOT_FORMATION	3.08492	KERATINIZATION	3.66614	ENSG00000137757.11	CASP5	-13.6597
TC1175 - HLA-DRB1
None		T_CELL_MEDIATED_IMMUNE_RESPONSE_TO_TUMOR_CELL	-3.04213	ENSG00000206306.10	HLA-DRB1	88.267	No significant correlations			Memory B cell
				ENSG00000206240.11	HLA-DRB1	88.267				Naive B cell
				ENSG00000231679.7	HLA-DRB3	12.8481				CD14+ monocyte type 1
				ENSG00000233697.2	HLA-DRB8	4.48532				Dendritic cell
				ENSG00000225920.2	RIMKLBP2	-3.11883
				ENSG00000226084.5	Unknown	-3.16103
				ENSG00000188089.14	PLA2G4E	-3.17522
				ENSG00000267127.7	Unknown	-3.26367
				ENSG00000125823.13	CSTL1	-3.37576
				ENSG00000230463.2	HLA-DRB3	-25.945
TC1238 - CCHCR1 and TCF19
None		None		ENSG00000234114.8	CCHCR1	101.635	No significant correlations			No cell type with distinctly higher activity
				ENSG00000206355.11	CCHCR1	100.347
				ENSG00000233890.6	TCF19	3.66187
				ENSG00000224379.6	TCF19	3.22523
				ENSG00000204536.15	CCHCR1	-4.3924
				ENSG00000206457.10	CCHCR1	-5.81343
