# Supplementary material for: Upfront whole blood transcriptional patterns in patients receiving immune checkpoint inhibitors associate with clinical outcome
Source: Research Square preprint supplement (doi:10.21203/rs.3.rs-6843569/v1), 2025-06-13
Supplement: Supplementary file 2 [file ef2e588ca8e08a8e997f6ecc.xlsx]

## Sheet: TCs <> Response (F2,SF1)
UNIVARIATE Response																											MULTIVARIATE Response
	Estimate	Std. Error	z value	Pr(>|z|)	mlogpva	MVP_reject_H0 nPerm= 10000 FDR= 0.01 conf= 0.99	MVP_reject_H0 nPerm= 10000 FDR= 0.01 conf= 0.95	MVP_reject_H0 nPerm= 10000 FDR= 0.01 conf= 0.9	MVP_reject_H0 nPerm= 10000 FDR= 0.01 conf= 0.85	MVP_reject_H0 nPerm= 10000 FDR= 0.01 conf= 0.8	MVP_reject_H0 nPerm= 10000 FDR= 0.05 conf= 0.99	MVP_reject_H0 nPerm= 10000 FDR= 0.05 conf= 0.95	MVP_reject_H0 nPerm= 10000 FDR= 0.05 conf= 0.9	MVP_reject_H0 nPerm= 10000 FDR= 0.05 conf= 0.85	MVP_reject_H0 nPerm= 10000 FDR= 0.05 conf= 0.8	MVP_reject_H0 nPerm= 10000 FDR= 0.1 conf= 0.99	MVP_reject_H0 nPerm= 10000 FDR= 0.1 conf= 0.95	MVP_reject_H0 nPerm= 10000 FDR= 0.1 conf= 0.9	MVP_reject_H0 nPerm= 10000 FDR= 0.1 conf= 0.85	MVP_reject_H0 nPerm= 10000 FDR= 0.1 conf= 0.8	MVP_reject_H0 nPerm= 10000 FDR= 0.2 conf= 0.99	MVP_reject_H0 nPerm= 10000 FDR= 0.2 conf= 0.95	MVP_reject_H0 nPerm= 10000 FDR= 0.2 conf= 0.9	MVP_reject_H0 nPerm= 10000 FDR= 0.2 conf= 0.85	MVP_reject_H0 nPerm= 10000 FDR= 0.2 conf= 0.8			Estimate	Std. Error	z value	Pr(>|z|)	mlogpva	MVP_reject_H0 nPerm= 10000 FDR= 0.01 conf= 0.99	MVP_reject_H0 nPerm= 10000 FDR= 0.01 conf= 0.95	MVP_reject_H0 nPerm= 10000 FDR= 0.01 conf= 0.9	MVP_reject_H0 nPerm= 10000 FDR= 0.01 conf= 0.85	MVP_reject_H0 nPerm= 10000 FDR= 0.01 conf= 0.8	MVP_reject_H0 nPerm= 10000 FDR= 0.05 conf= 0.99	MVP_reject_H0 nPerm= 10000 FDR= 0.05 conf= 0.95	MVP_reject_H0 nPerm= 10000 FDR= 0.05 conf= 0.9	MVP_reject_H0 nPerm= 10000 FDR= 0.05 conf= 0.85	MVP_reject_H0 nPerm= 10000 FDR= 0.05 conf= 0.8	MVP_reject_H0 nPerm= 10000 FDR= 0.1 conf= 0.99	MVP_reject_H0 nPerm= 10000 FDR= 0.1 conf= 0.95	MVP_reject_H0 nPerm= 10000 FDR= 0.1 conf= 0.9	MVP_reject_H0 nPerm= 10000 FDR= 0.1 conf= 0.85	MVP_reject_H0 nPerm= 10000 FDR= 0.1 conf= 0.8	MVP_reject_H0 nPerm= 10000 FDR= 0.2 conf= 0.99	MVP_reject_H0 nPerm= 10000 FDR= 0.2 conf= 0.95
consensus.independent.component.3	-0.0289503	0.0288814	-1.00239	0.316157	0.500098	FALSE	FALSE	FALSE	FALSE	FALSE	FALSE	FALSE	FALSE	FALSE	FALSE	FALSE	FALSE	FALSE	FALSE	FALSE	FALSE	FALSE	FALSE	FALSE	FALSE		consensus.independent.component.3	-0.00666281	0.033485	-0.198979	0.842279	0.0745438	FALSE	FALSE	FALSE	FALSE	FALSE	FALSE	FALSE	FALSE	FALSE	FALSE	FALSE	FALSE	FALSE	FALSE	FALSE	FALSE	FALSE
consensus.independent.component.6	0.0159592	0.0206457	0.773004	0.43952	0.357021	FALSE	FALSE	FALSE	FALSE	FALSE	FALSE	FALSE	FALSE	FALSE	FALSE	FALSE	FALSE	FALSE	FALSE	FALSE	FALSE	FALSE	FALSE	FALSE	FALSE		consensus.independent.component.6	-0.000173998	0.024312	-0.00715686	0.99429	0.00248706	FALSE	FALSE	FALSE	FALSE	FALSE	FALSE	FALSE	FALSE	FALSE	FALSE	FALSE	FALSE	FALSE	FALSE	FALSE	FALSE	FALSE
consensus.independent.component.7	-0.0401083	0.0352796	-1.13687	0.255593	0.592452	FALSE	FALSE	FALSE	FALSE	FALSE	FALSE	FALSE	FALSE	FALSE	FALSE	FALSE	FALSE	FALSE	FALSE	FALSE	FALSE	FALSE	FALSE	FALSE	FALSE		consensus.independent.component.7	-0.0429882	0.0420426	-1.02249	0.306548	0.513502	FALSE	FALSE	FALSE	FALSE	FALSE	FALSE	FALSE	FALSE	FALSE	FALSE	FALSE	FALSE	FALSE	FALSE	FALSE	FALSE	FALSE
consensus.independent.component.8	-0.0283685	0.0570261	-0.497466	0.61886	0.208407	FALSE	FALSE	FALSE	FALSE	FALSE	FALSE	FALSE	FALSE	FALSE	FALSE	FALSE	FALSE	FALSE	FALSE	FALSE	FALSE	FALSE	FALSE	FALSE	FALSE		consensus.independent.component.8	-0.010949	0.0730597	-0.149864	0.880872	0.0550872	FALSE	FALSE	FALSE	FALSE	FALSE	FALSE	FALSE	FALSE	FALSE	FALSE	FALSE	FALSE	FALSE	FALSE	FALSE	FALSE	FALSE
consensus.independent.component.9	0.0028969	0.037206	0.077861	0.937939	0.0278256	FALSE	FALSE	FALSE	FALSE	FALSE	FALSE	FALSE	FALSE	FALSE	FALSE	FALSE	FALSE	FALSE	FALSE	FALSE	FALSE	FALSE	FALSE	FALSE	FALSE		consensus.independent.component.9	-0.0463797	0.0483113	-0.960018	0.337046	0.472311	FALSE	FALSE	FALSE	FALSE	FALSE	FALSE	FALSE	FALSE	FALSE	FALSE	FALSE	FALSE	FALSE	FALSE	FALSE	FALSE	FALSE
consensus.independent.component.11	-0.034082	0.0250575	-1.36015	0.173783	0.759992	FALSE	FALSE	FALSE	FALSE	FALSE	FALSE	FALSE	FALSE	FALSE	FALSE	FALSE	FALSE	FALSE	FALSE	FALSE	FALSE	FALSE	FALSE	FALSE	FALSE		consensus.independent.component.11	-0.0213751	0.0298734	-0.715523	0.474286	0.323959	FALSE	FALSE	FALSE	FALSE	FALSE	FALSE	FALSE	FALSE	FALSE	FALSE	FALSE	FALSE	FALSE	FALSE	FALSE	FALSE	FALSE
consensus.independent.component.15	0.0564686	0.0501126	1.12684	0.259812	0.58534	FALSE	FALSE	FALSE	FALSE	FALSE	FALSE	FALSE	FALSE	FALSE	FALSE	FALSE	FALSE	FALSE	FALSE	FALSE	FALSE	FALSE	FALSE	FALSE	FALSE		consensus.independent.component.15	0.065193	0.0586171	1.11218	0.26606	0.575021	FALSE	FALSE	FALSE	FALSE	FALSE	FALSE	FALSE	FALSE	FALSE	FALSE	FALSE	FALSE	FALSE	FALSE	FALSE	FALSE	FALSE
consensus.independent.component.19	-0.0188849	0.0216276	-0.873189	0.38256	0.4173	FALSE	FALSE	FALSE	FALSE	FALSE	FALSE	FALSE	FALSE	FALSE	FALSE	FALSE	FALSE	FALSE	FALSE	FALSE	FALSE	FALSE	FALSE	FALSE	FALSE		consensus.independent.component.19	-0.0279715	0.025335	-1.10406	0.269566	0.569335	FALSE	FALSE	FALSE	FALSE	FALSE	FALSE	FALSE	FALSE	FALSE	FALSE	FALSE	FALSE	FALSE	FALSE	FALSE	FALSE	FALSE
consensus.independent.component.28	-0.0242872	0.063812	-0.380606	0.703496	0.152738	FALSE	FALSE	FALSE	FALSE	FALSE	FALSE	FALSE	FALSE	FALSE	FALSE	FALSE	FALSE	FALSE	FALSE	FALSE	FALSE	FALSE	FALSE	FALSE	FALSE		consensus.independent.component.28	-0.0338341	0.0736574	-0.459344	0.645987	0.189776	FALSE	FALSE	FALSE	FALSE	FALSE	FALSE	FALSE	FALSE	FALSE	FALSE	FALSE	FALSE	FALSE	FALSE	FALSE	FALSE	FALSE
consensus.independent.component.51	-0.00579403	0.014734	-0.393242	0.69414	0.158553	FALSE	FALSE	FALSE	FALSE	FALSE	FALSE	FALSE	FALSE	FALSE	FALSE	FALSE	FALSE	FALSE	FALSE	FALSE	FALSE	FALSE	FALSE	FALSE	FALSE		consensus.independent.component.51	0.00243542	0.018574	0.13112	0.895681	0.0478469	FALSE	FALSE	FALSE	FALSE	FALSE	FALSE	FALSE	FALSE	FALSE	FALSE	FALSE	FALSE	FALSE	FALSE	FALSE	FALSE	FALSE
consensus.independent.component.59	0.031384	0.0499365	0.628478	0.529691	0.275978	FALSE	FALSE	FALSE	FALSE	FALSE	FALSE	FALSE	FALSE	FALSE	FALSE	FALSE	FALSE	FALSE	FALSE	FALSE	FALSE	FALSE	FALSE	FALSE	FALSE		consensus.independent.component.59	0.0350878	0.0605559	0.579429	0.5623	0.250032	FALSE	FALSE	FALSE	FALSE	FALSE	FALSE	FALSE	FALSE	FALSE	FALSE	FALSE	FALSE	FALSE	FALSE	FALSE	FALSE	FALSE
consensus.independent.component.73	0.00518164	0.0219166	0.236425	0.813103	0.0898544	FALSE	FALSE	FALSE	FALSE	FALSE	FALSE	FALSE	FALSE	FALSE	FALSE	FALSE	FALSE	FALSE	FALSE	FALSE	FALSE	FALSE	FALSE	FALSE	FALSE		consensus.independent.component.73	0.00497701	0.0276308	0.180125	0.857054	0.0669916	FALSE	FALSE	FALSE	FALSE	FALSE	FALSE	FALSE	FALSE	FALSE	FALSE	FALSE	FALSE	FALSE	FALSE	FALSE	FALSE	FALSE
consensus.independent.component.93	-0.0711587	0.0810625	-0.877825	0.380039	0.420172	FALSE	FALSE	FALSE	FALSE	FALSE	FALSE	FALSE	FALSE	FALSE	FALSE	FALSE	FALSE	FALSE	FALSE	FALSE	FALSE	FALSE	FALSE	FALSE	FALSE		consensus.independent.component.93	-0.00393837	0.0941897	-0.0418132	0.966648	0.0147318	FALSE	FALSE	FALSE	FALSE	FALSE	FALSE	FALSE	FALSE	FALSE	FALSE	FALSE	FALSE	FALSE	FALSE	FALSE	FALSE	FALSE
consensus.independent.component.100	0.0111521	0.0152352	0.731999	0.464169	0.333324	FALSE	FALSE	FALSE	FALSE	FALSE	FALSE	FALSE	FALSE	FALSE	FALSE	FALSE	FALSE	FALSE	FALSE	FALSE	FALSE	FALSE	FALSE	FALSE	FALSE		consensus.independent.component.100	0.00989357	0.0167956	0.589057	0.555823	0.255064	FALSE	FALSE	FALSE	FALSE	FALSE	FALSE	FALSE	FALSE	FALSE	FALSE	FALSE	FALSE	FALSE	FALSE	FALSE	FALSE	FALSE
consensus.independent.component.168	0.0135416	0.0756903	0.178908	0.85801	0.0665075	FALSE	FALSE	FALSE	FALSE	FALSE	FALSE	FALSE	FALSE	FALSE	FALSE	FALSE	FALSE	FALSE	FALSE	FALSE	FALSE	FALSE	FALSE	FALSE	FALSE		consensus.independent.component.168	-0.0229817	0.0897817	-0.255973	0.797971	0.0980126	FALSE	FALSE	FALSE	FALSE	FALSE	FALSE	FALSE	FALSE	FALSE	FALSE	FALSE	FALSE	FALSE	FALSE	FALSE	FALSE	FALSE
consensus.independent.component.190	0.0646158	0.0680888	0.948994	0.342624	0.465183	FALSE	FALSE	FALSE	FALSE	FALSE	FALSE	FALSE	FALSE	FALSE	FALSE	FALSE	FALSE	FALSE	FALSE	FALSE	FALSE	FALSE	FALSE	FALSE	FALSE		consensus.independent.component.190	0.112996	0.0796379	1.41887	0.155937	0.80705	FALSE	FALSE	FALSE	FALSE	FALSE	FALSE	FALSE	FALSE	FALSE	FALSE	FALSE	FALSE	FALSE	FALSE	FALSE	FALSE	FALSE
consensus.independent.component.299	0.0118351	0.0628777	0.188225	0.8507	0.0702233	FALSE	FALSE	FALSE	FALSE	FALSE	FALSE	FALSE	FALSE	FALSE	FALSE	FALSE	FALSE	FALSE	FALSE	FALSE	FALSE	FALSE	FALSE	FALSE	FALSE		consensus.independent.component.299	0.0506263	0.0746304	0.67836	0.497544	0.303169	FALSE	FALSE	FALSE	FALSE	FALSE	FALSE	FALSE	FALSE	FALSE	FALSE	FALSE	FALSE	FALSE	FALSE	FALSE	FALSE	FALSE
consensus.independent.component.331	0.0800925	0.064784	1.2363	0.216347	0.664849	FALSE	FALSE	FALSE	FALSE	FALSE	FALSE	FALSE	FALSE	FALSE	FALSE	FALSE	FALSE	FALSE	FALSE	FALSE	FALSE	FALSE	FALSE	FALSE	FALSE		consensus.independent.component.331	0.12359	0.0749193	1.64964	0.0990162	1.00429	FALSE	FALSE	FALSE	FALSE	FALSE	FALSE	FALSE	FALSE	FALSE	FALSE	FALSE	FALSE	FALSE	FALSE	FALSE	FALSE	FALSE
consensus.independent.component.341	0.0859956	0.0700408	1.22779	0.219525	0.658517	FALSE	FALSE	FALSE	FALSE	FALSE	FALSE	FALSE	FALSE	FALSE	FALSE	FALSE	FALSE	FALSE	FALSE	FALSE	FALSE	FALSE	FALSE	FALSE	FALSE		consensus.independent.component.341	0.0478253	0.0803867	0.59494	0.551883	0.258153	FALSE	FALSE	FALSE	FALSE	FALSE	FALSE	FALSE	FALSE	FALSE	FALSE	FALSE	FALSE	FALSE	FALSE	FALSE	FALSE	FALSE
consensus.independent.component.351	0.00339082	0.0395553	0.0857236	0.931686	0.0307304	FALSE	FALSE	FALSE	FALSE	FALSE	FALSE	FALSE	FALSE	FALSE	FALSE	FALSE	FALSE	FALSE	FALSE	FALSE	FALSE	FALSE	FALSE	FALSE	FALSE		consensus.independent.component.351	-0.0379628	0.0478761	-0.792938	0.427814	0.368745	FALSE	FALSE	FALSE	FALSE	FALSE	FALSE	FALSE	FALSE	FALSE	FALSE	FALSE	FALSE	FALSE	FALSE	FALSE	FALSE	FALSE
consensus.independent.component.388	0.0472923	0.0478506	0.988332	0.32299	0.490811	FALSE	FALSE	FALSE	FALSE	FALSE	FALSE	FALSE	FALSE	FALSE	FALSE	FALSE	FALSE	FALSE	FALSE	FALSE	FALSE	FALSE	FALSE	FALSE	FALSE		consensus.independent.component.388	0.0725837	0.0538764	1.34723	0.177907	0.749807	FALSE	FALSE	FALSE	FALSE	FALSE	FALSE	FALSE	FALSE	FALSE	FALSE	FALSE	FALSE	FALSE	FALSE	FALSE	FALSE	FALSE
consensus.independent.component.398	-0.00404388	0.0168672	-0.239748	0.810525	0.0912333	FALSE	FALSE	FALSE	FALSE	FALSE	FALSE	FALSE	FALSE	FALSE	FALSE	FALSE	FALSE	FALSE	FALSE	FALSE	FALSE	FALSE	FALSE	FALSE	FALSE		consensus.independent.component.398	-0.0058433	0.0188355	-0.310227	0.756388	0.121255	FALSE	FALSE	FALSE	FALSE	FALSE	FALSE	FALSE	FALSE	FALSE	FALSE	FALSE	FALSE	FALSE	FALSE	FALSE	FALSE	FALSE
consensus.independent.component.499	-0.023654	0.0553803	-0.427119	0.669292	0.174384	FALSE	FALSE	FALSE	FALSE	FALSE	FALSE	FALSE	FALSE	FALSE	FALSE	FALSE	FALSE	FALSE	FALSE	FALSE	FALSE	FALSE	FALSE	FALSE	FALSE		consensus.independent.component.499	-0.120232	0.0756625	-1.58906	0.112048	0.950598	FALSE	FALSE	FALSE	FALSE	FALSE	FALSE	FALSE	FALSE	FALSE	FALSE	FALSE	FALSE	FALSE	FALSE	FALSE	FALSE	FALSE
consensus.independent.component.525	-0.00404434	0.0162178	-0.249376	0.80307	0.0952467	FALSE	FALSE	FALSE	FALSE	FALSE	FALSE	FALSE	FALSE	FALSE	FALSE	FALSE	FALSE	FALSE	FALSE	FALSE	FALSE	FALSE	FALSE	FALSE	FALSE		consensus.independent.component.525	-0.0036926	0.0193474	-0.190857	0.848637	0.0712779	FALSE	FALSE	FALSE	FALSE	FALSE	FALSE	FALSE	FALSE	FALSE	FALSE	FALSE	FALSE	FALSE	FALSE	FALSE	FALSE	FALSE
consensus.independent.component.551	0.0474156	0.0686077	0.691111	0.489496	0.310251	FALSE	FALSE	FALSE	FALSE	FALSE	FALSE	FALSE	FALSE	FALSE	FALSE	FALSE	FALSE	FALSE	FALSE	FALSE	FALSE	FALSE	FALSE	FALSE	FALSE		consensus.independent.component.551	0.0521907	0.0802647	0.650232	0.515542	0.287736	FALSE	FALSE	FALSE	FALSE	FALSE	FALSE	FALSE	FALSE	FALSE	FALSE	FALSE	FALSE	FALSE	FALSE	FALSE	FALSE	FALSE
consensus.independent.component.671	-0.0575905	0.057786	-0.996618	0.31895	0.496278	FALSE	FALSE	FALSE	FALSE	FALSE	FALSE	FALSE	FALSE	FALSE	FALSE	FALSE	FALSE	FALSE	FALSE	FALSE	FALSE	FALSE	FALSE	FALSE	FALSE		consensus.independent.component.671	-0.0781227	0.0664423	-1.1758	0.239676	0.620376	FALSE	FALSE	FALSE	FALSE	FALSE	FALSE	FALSE	FALSE	FALSE	FALSE	FALSE	FALSE	FALSE	FALSE	FALSE	FALSE	FALSE
consensus.independent.component.733	-0.0483586	0.0759354	-0.636839	0.52423	0.280479	FALSE	FALSE	FALSE	FALSE	FALSE	FALSE	FALSE	FALSE	FALSE	FALSE	FALSE	FALSE	FALSE	FALSE	FALSE	FALSE	FALSE	FALSE	FALSE	FALSE		consensus.independent.component.733	-0.117378	0.0912047	-1.28697	0.198105	0.703104	FALSE	FALSE	FALSE	FALSE	FALSE	FALSE	FALSE	FALSE	FALSE	FALSE	FALSE	FALSE	FALSE	FALSE	FALSE	FALSE	FALSE
consensus.independent.component.734	-0.0875158	0.0672591	-1.30118	0.193198	0.713996	FALSE	FALSE	FALSE	FALSE	FALSE	FALSE	FALSE	FALSE	FALSE	FALSE	FALSE	FALSE	FALSE	FALSE	FALSE	FALSE	FALSE	FALSE	FALSE	FALSE		consensus.independent.component.734	-0.0918714	0.0779851	-1.17806	0.238771	0.622018	FALSE	FALSE	FALSE	FALSE	FALSE	FALSE	FALSE	FALSE	FALSE	FALSE	FALSE	FALSE	FALSE	FALSE	FALSE	FALSE	FALSE
consensus.independent.component.757	0.000417495	0.0547072	0.00763145	0.993911	0.00265248	FALSE	FALSE	FALSE	FALSE	FALSE	FALSE	FALSE	FALSE	FALSE	FALSE	FALSE	FALSE	FALSE	FALSE	FALSE	FALSE	FALSE	FALSE	FALSE	FALSE		consensus.independent.component.757	0.0216147	0.0617972	0.349769	0.726512	0.138757	FALSE	FALSE	FALSE	FALSE	FALSE	FALSE	FALSE	FALSE	FALSE	FALSE	FALSE	FALSE	FALSE	FALSE	FALSE	FALSE	FALSE
consensus.independent.component.785	0.101452	0.0823742	1.2316	0.218097	0.66135	FALSE	FALSE	FALSE	FALSE	FALSE	FALSE	FALSE	FALSE	FALSE	FALSE	FALSE	FALSE	FALSE	FALSE	FALSE	FALSE	FALSE	FALSE	FALSE	FALSE		consensus.independent.component.785	0.131865	0.0998748	1.32031	0.186733	0.728779	FALSE	FALSE	FALSE	FALSE	FALSE	FALSE	FALSE	FALSE	FALSE	FALSE	FALSE	FALSE	FALSE	FALSE	FALSE	FALSE	FALSE
consensus.independent.component.792	-0.0166154	0.0242144	-0.686179	0.4926	0.307505	FALSE	FALSE	FALSE	FALSE	FALSE	FALSE	FALSE	FALSE	FALSE	FALSE	FALSE	FALSE	FALSE	FALSE	FALSE	FALSE	FALSE	FALSE	FALSE	FALSE		consensus.independent.component.792	-0.03469	0.0286402	-1.21123	0.225806	0.646264	FALSE	FALSE	FALSE	FALSE	FALSE	FALSE	FALSE	FALSE	FALSE	FALSE	FALSE	FALSE	FALSE	FALSE	FALSE	FALSE	FALSE
consensus.independent.component.793	0.000171328	0.0267172	0.00641264	0.994883	0.00222778	FALSE	FALSE	FALSE	FALSE	FALSE	FALSE	FALSE	FALSE	FALSE	FALSE	FALSE	FALSE	FALSE	FALSE	FALSE	FALSE	FALSE	FALSE	FALSE	FALSE		consensus.independent.component.793	-0.0375157	0.0335031	-1.11977	0.262813	0.580353	FALSE	FALSE	FALSE	FALSE	FALSE	FALSE	FALSE	FALSE	FALSE	FALSE	FALSE	FALSE	FALSE	FALSE	FALSE	FALSE	FALSE
consensus.independent.component.807	-0.0141558	0.0537222	-0.2635	0.792166	0.101184	FALSE	FALSE	FALSE	FALSE	FALSE	FALSE	FALSE	FALSE	FALSE	FALSE	FALSE	FALSE	FALSE	FALSE	FALSE	FALSE	FALSE	FALSE	FALSE	FALSE		consensus.independent.component.807	-0.111672	0.0747607	-1.49373	0.135246	0.868876	FALSE	FALSE	FALSE	FALSE	FALSE	FALSE	FALSE	FALSE	FALSE	FALSE	FALSE	FALSE	FALSE	FALSE	FALSE	FALSE	FALSE
consensus.independent.component.822	-0.0115286	0.0691802	-0.166646	0.867648	0.0616562	FALSE	FALSE	FALSE	FALSE	FALSE	FALSE	FALSE	FALSE	FALSE	FALSE	FALSE	FALSE	FALSE	FALSE	FALSE	FALSE	FALSE	FALSE	FALSE	FALSE		consensus.independent.component.822	0.0304463	0.0827797	0.367798	0.713024	0.146896	FALSE	FALSE	FALSE	FALSE	FALSE	FALSE	FALSE	FALSE	FALSE	FALSE	FALSE	FALSE	FALSE	FALSE	FALSE	FALSE	FALSE
consensus.independent.component.849	-0.0402779	0.0292816	-1.37554	0.168965	0.772202	FALSE	FALSE	FALSE	FALSE	FALSE	FALSE	FALSE	FALSE	FALSE	FALSE	FALSE	FALSE	FALSE	FALSE	FALSE	FALSE	FALSE	FALSE	FALSE	FALSE		consensus.independent.component.849	-0.0309675	0.0355422	-0.871287	0.383597	0.416124	FALSE	FALSE	FALSE	FALSE	FALSE	FALSE	FALSE	FALSE	FALSE	FALSE	FALSE	FALSE	FALSE	FALSE	FALSE	FALSE	FALSE
consensus.independent.component.865	-0.120064	0.07023	-1.70959	0.0873423	1.05878	FALSE	FALSE	FALSE	FALSE	FALSE	FALSE	FALSE	FALSE	FALSE	FALSE	FALSE	FALSE	FALSE	FALSE	FALSE	FALSE	FALSE	FALSE	FALSE	FALSE		consensus.independent.component.865	-0.208498	0.0845416	-2.46622	0.0136547	1.86472	TRUE	TRUE	TRUE	TRUE	TRUE	TRUE	TRUE	TRUE	TRUE	TRUE	TRUE	TRUE	TRUE	TRUE	TRUE	TRUE	TRUE
consensus.independent.component.882	0.0315543	0.0730552	0.431924	0.665797	0.176658	FALSE	FALSE	FALSE	FALSE	FALSE	FALSE	FALSE	FALSE	FALSE	FALSE	FALSE	FALSE	FALSE	FALSE	FALSE	FALSE	FALSE	FALSE	FALSE	FALSE		consensus.independent.component.882	0.0320805	0.0841416	0.381268	0.703004	0.153042	FALSE	FALSE	FALSE	FALSE	FALSE	FALSE	FALSE	FALSE	FALSE	FALSE	FALSE	FALSE	FALSE	FALSE	FALSE	FALSE	FALSE
consensus.independent.component.888	0.043728	0.0694505	0.629629	0.528937	0.276596	FALSE	FALSE	FALSE	FALSE	FALSE	FALSE	FALSE	FALSE	FALSE	FALSE	FALSE	FALSE	FALSE	FALSE	FALSE	FALSE	FALSE	FALSE	FALSE	FALSE		consensus.independent.component.888	0.0635389	0.0798491	0.795738	0.426184	0.370402	FALSE	FALSE	FALSE	FALSE	FALSE	FALSE	FALSE	FALSE	FALSE	FALSE	FALSE	FALSE	FALSE	FALSE	FALSE	FALSE	FALSE
consensus.independent.component.918	-0.0385475	0.0590934	-0.652314	0.514198	0.288869	FALSE	FALSE	FALSE	FALSE	FALSE	FALSE	FALSE	FALSE	FALSE	FALSE	FALSE	FALSE	FALSE	FALSE	FALSE	FALSE	FALSE	FALSE	FALSE	FALSE		consensus.independent.component.918	-0.0708781	0.0668038	-1.06099	0.288695	0.53956	FALSE	FALSE	FALSE	FALSE	FALSE	FALSE	FALSE	FALSE	FALSE	FALSE	FALSE	FALSE	FALSE	FALSE	FALSE	FALSE	FALSE
consensus.independent.component.920	-0.0862658	0.0580583	-1.48585	0.13732	0.862268	FALSE	FALSE	FALSE	FALSE	FALSE	FALSE	FALSE	FALSE	FALSE	FALSE	FALSE	FALSE	FALSE	FALSE	FALSE	FALSE	FALSE	FALSE	FALSE	FALSE		consensus.independent.component.920	-0.119106	0.0675497	-1.76324	0.0778607	1.10868	FALSE	FALSE	FALSE	FALSE	FALSE	FALSE	FALSE	FALSE	FALSE	FALSE	FALSE	FALSE	FALSE	FALSE	FALSE	FALSE	FALSE
consensus.independent.component.921	0.0362912	0.0666918	0.544164	0.586329	0.231859	FALSE	FALSE	FALSE	FALSE	FALSE	FALSE	FALSE	FALSE	FALSE	FALSE	FALSE	FALSE	FALSE	FALSE	FALSE	FALSE	FALSE	FALSE	FALSE	FALSE		consensus.independent.component.921	0.0291588	0.0755044	0.386187	0.699358	0.155301	FALSE	FALSE	FALSE	FALSE	FALSE	FALSE	FALSE	FALSE	FALSE	FALSE	FALSE	FALSE	FALSE	FALSE	FALSE	FALSE	FALSE
consensus.independent.component.943	0.0639606	0.0578043	1.1065	0.268509	0.571041	FALSE	FALSE	FALSE	FALSE	FALSE	FALSE	FALSE	FALSE	FALSE	FALSE	FALSE	FALSE	FALSE	FALSE	FALSE	FALSE	FALSE	FALSE	FALSE	FALSE		consensus.independent.component.943	0.0750919	0.0664992	1.12921	0.258807	0.587024	FALSE	FALSE	FALSE	FALSE	FALSE	FALSE	FALSE	FALSE	FALSE	FALSE	FALSE	FALSE	FALSE	FALSE	FALSE	FALSE	FALSE
consensus.independent.component.944	0.04405	0.071561	0.615559	0.538186	0.269068	FALSE	FALSE	FALSE	FALSE	FALSE	FALSE	FALSE	FALSE	FALSE	FALSE	FALSE	FALSE	FALSE	FALSE	FALSE	FALSE	FALSE	FALSE	FALSE	FALSE		consensus.independent.component.944	0.0308594	0.0798965	0.386241	0.699318	0.155325	FALSE	FALSE	FALSE	FALSE	FALSE	FALSE	FALSE	FALSE	FALSE	FALSE	FALSE	FALSE	FALSE	FALSE	FALSE	FALSE	FALSE
consensus.independent.component.959	0.0984248	0.0758194	1.29815	0.194236	0.71167	FALSE	FALSE	FALSE	FALSE	FALSE	FALSE	FALSE	FALSE	FALSE	FALSE	FALSE	FALSE	FALSE	FALSE	FALSE	FALSE	FALSE	FALSE	FALSE	FALSE		consensus.independent.component.959	0.0968489	0.0843865	1.14768	0.251099	0.600154	FALSE	FALSE	FALSE	FALSE	FALSE	FALSE	FALSE	FALSE	FALSE	FALSE	FALSE	FALSE	FALSE	FALSE	FALSE	FALSE	FALSE
consensus.independent.component.976	-0.0342937	0.0691604	-0.495858	0.619995	0.207612	FALSE	FALSE	FALSE	FALSE	FALSE	FALSE	FALSE	FALSE	FALSE	FALSE	FALSE	FALSE	FALSE	FALSE	FALSE	FALSE	FALSE	FALSE	FALSE	FALSE		consensus.independent.component.976	-0.0122677	0.0823316	-0.149003	0.881551	0.0547526	FALSE	FALSE	FALSE	FALSE	FALSE	FALSE	FALSE	FALSE	FALSE	FALSE	FALSE	FALSE	FALSE	FALSE	FALSE	FALSE	FALSE
consensus.independent.component.977	-0.0836643	0.0789216	-1.06009	0.289102	0.538949	FALSE	FALSE	FALSE	FALSE	FALSE	FALSE	FALSE	FALSE	FALSE	FALSE	FALSE	FALSE	FALSE	FALSE	FALSE	FALSE	FALSE	FALSE	FALSE	FALSE		consensus.independent.component.977	-0.13956	0.0919253	-1.51818	0.128968	0.889518	FALSE	FALSE	FALSE	FALSE	FALSE	FALSE	FALSE	FALSE	FALSE	FALSE	FALSE	FALSE	FALSE	FALSE	FALSE	FALSE	FALSE
consensus.independent.component.1041	0.00682488	0.0661667	0.103147	0.917847	0.0372299	FALSE	FALSE	FALSE	FALSE	FALSE	FALSE	FALSE	FALSE	FALSE	FALSE	FALSE	FALSE	FALSE	FALSE	FALSE	FALSE	FALSE	FALSE	FALSE	FALSE		consensus.independent.component.1041	-0.0446747	0.0751144	-0.594756	0.552007	0.258056	FALSE	FALSE	FALSE	FALSE	FALSE	FALSE	FALSE	FALSE	FALSE	FALSE	FALSE	FALSE	FALSE	FALSE	FALSE	FALSE	FALSE
consensus.independent.component.1052	0.0652054	0.0665658	0.979564	0.327302	0.485052	FALSE	FALSE	FALSE	FALSE	FALSE	FALSE	FALSE	FALSE	FALSE	FALSE	FALSE	FALSE	FALSE	FALSE	FALSE	FALSE	FALSE	FALSE	FALSE	FALSE		consensus.independent.component.1052	0.072766	0.0759656	0.95788	0.338123	0.470925	FALSE	FALSE	FALSE	FALSE	FALSE	FALSE	FALSE	FALSE	FALSE	FALSE	FALSE	FALSE	FALSE	FALSE	FALSE	FALSE	FALSE
consensus.independent.component.1057	0.0814332	0.0593133	1.37293	0.169773	0.77013	FALSE	FALSE	FALSE	FALSE	FALSE	FALSE	FALSE	FALSE	FALSE	FALSE	FALSE	FALSE	FALSE	FALSE	FALSE	FALSE	FALSE	FALSE	FALSE	FALSE		consensus.independent.component.1057	0.0726635	0.066963	1.08513	0.277864	0.556168	FALSE	FALSE	FALSE	FALSE	FALSE	FALSE	FALSE	FALSE	FALSE	FALSE	FALSE	FALSE	FALSE	FALSE	FALSE	FALSE	FALSE
consensus.independent.component.1093	-0.0461266	0.046727	-0.987152	0.323568	0.490034	FALSE	FALSE	FALSE	FALSE	FALSE	FALSE	FALSE	FALSE	FALSE	FALSE	FALSE	FALSE	FALSE	FALSE	FALSE	FALSE	FALSE	FALSE	FALSE	FALSE		consensus.independent.component.1093	-0.0788642	0.0537193	-1.46808	0.142082	0.84746	FALSE	FALSE	FALSE	FALSE	FALSE	FALSE	FALSE	FALSE	FALSE	FALSE	FALSE	FALSE	FALSE	FALSE	FALSE	FALSE	FALSE
consensus.independent.component.1099	0.0754674	0.0660333	1.14287	0.253093	0.59672	FALSE	FALSE	FALSE	FALSE	FALSE	FALSE	FALSE	FALSE	FALSE	FALSE	FALSE	FALSE	FALSE	FALSE	FALSE	FALSE	FALSE	FALSE	FALSE	FALSE		consensus.independent.component.1099	0.0266467	0.0777159	0.342873	0.731694	0.13567	FALSE	FALSE	FALSE	FALSE	FALSE	FALSE	FALSE	FALSE	FALSE	FALSE	FALSE	FALSE	FALSE	FALSE	FALSE	FALSE	FALSE
consensus.independent.component.1109	0.00376788	0.0230948	0.163148	0.870402	0.0602803	FALSE	FALSE	FALSE	FALSE	FALSE	FALSE	FALSE	FALSE	FALSE	FALSE	FALSE	FALSE	FALSE	FALSE	FALSE	FALSE	FALSE	FALSE	FALSE	FALSE		consensus.independent.component.1109	-0.0134449	0.0283075	-0.474958	0.634817	0.197352	FALSE	FALSE	FALSE	FALSE	FALSE	FALSE	FALSE	FALSE	FALSE	FALSE	FALSE	FALSE	FALSE	FALSE	FALSE	FALSE	FALSE
consensus.independent.component.1125	0.109182	0.0603683	1.8086	0.0705132	1.15173	FALSE	FALSE	FALSE	FALSE	FALSE	FALSE	FALSE	FALSE	FALSE	FALSE	FALSE	FALSE	FALSE	FALSE	FALSE	FALSE	FALSE	FALSE	FALSE	FALSE		consensus.independent.component.1125	0.143525	0.0672993	2.13263	0.0329549	1.48208	FALSE	FALSE	FALSE	FALSE	FALSE	FALSE	FALSE	FALSE	FALSE	FALSE	FALSE	FALSE	FALSE	FALSE	FALSE	FALSE	FALSE
consensus.independent.component.1127	0.0173064	0.072644	0.238235	0.811699	0.0906052	FALSE	FALSE	FALSE	FALSE	FALSE	FALSE	FALSE	FALSE	FALSE	FALSE	FALSE	FALSE	FALSE	FALSE	FALSE	FALSE	FALSE	FALSE	FALSE	FALSE		consensus.independent.component.1127	-0.0380403	0.087417	-0.435158	0.663447	0.178194	FALSE	FALSE	FALSE	FALSE	FALSE	FALSE	FALSE	FALSE	FALSE	FALSE	FALSE	FALSE	FALSE	FALSE	FALSE	FALSE	FALSE
consensus.independent.component.1148	-0.042213	0.0753958	-0.559885	0.575558	0.239911	FALSE	FALSE	FALSE	FALSE	FALSE	FALSE	FALSE	FALSE	FALSE	FALSE	FALSE	FALSE	FALSE	FALSE	FALSE	FALSE	FALSE	FALSE	FALSE	FALSE		consensus.independent.component.1148	-0.0210435	0.0859974	-0.244699	0.80669	0.0932935	FALSE	FALSE	FALSE	FALSE	FALSE	FALSE	FALSE	FALSE	FALSE	FALSE	FALSE	FALSE	FALSE	FALSE	FALSE	FALSE	FALSE
consensus.independent.component.1151	-0.0528943	0.0442613	-1.19505	0.232069	0.634382	FALSE	FALSE	FALSE	FALSE	FALSE	FALSE	FALSE	FALSE	FALSE	FALSE	FALSE	FALSE	FALSE	FALSE	FALSE	FALSE	FALSE	FALSE	FALSE	FALSE		consensus.independent.component.1151	-0.0594765	0.0522482	-1.13835	0.254976	0.5935	FALSE	FALSE	FALSE	FALSE	FALSE	FALSE	FALSE	FALSE	FALSE	FALSE	FALSE	FALSE	FALSE	FALSE	FALSE	FALSE	FALSE
consensus.independent.component.1154	-0.0612141	0.0601609	-1.01751	0.308913	0.510164	FALSE	FALSE	FALSE	FALSE	FALSE	FALSE	FALSE	FALSE	FALSE	FALSE	FALSE	FALSE	FALSE	FALSE	FALSE	FALSE	FALSE	FALSE	FALSE	FALSE		consensus.independent.component.1154	-0.0884222	0.0677454	-1.30521	0.19182	0.717106	FALSE	FALSE	FALSE	FALSE	FALSE	FALSE	FALSE	FALSE	FALSE	FALSE	FALSE	FALSE	FALSE	FALSE	FALSE	FALSE	FALSE
consensus.independent.component.1166	-0.0599206	0.0500637	-1.19689	0.23135	0.63573	FALSE	FALSE	FALSE	FALSE	FALSE	FALSE	FALSE	FALSE	FALSE	FALSE	FALSE	FALSE	FALSE	FALSE	FALSE	FALSE	FALSE	FALSE	FALSE	FALSE		consensus.independent.component.1166	-0.0557352	0.0566538	-0.983786	0.325221	0.487822	FALSE	FALSE	FALSE	FALSE	FALSE	FALSE	FALSE	FALSE	FALSE	FALSE	FALSE	FALSE	FALSE	FALSE	FALSE	FALSE	FALSE
consensus.independent.component.1170	0.0245754	0.0713857	0.344262	0.730649	0.136291	FALSE	FALSE	FALSE	FALSE	FALSE	FALSE	FALSE	FALSE	FALSE	FALSE	FALSE	FALSE	FALSE	FALSE	FALSE	FALSE	FALSE	FALSE	FALSE	FALSE		consensus.independent.component.1170	0.111502	0.0925489	1.20479	0.228286	0.64152	FALSE	FALSE	FALSE	FALSE	FALSE	FALSE	FALSE	FALSE	FALSE	FALSE	FALSE	FALSE	FALSE	FALSE	FALSE	FALSE	FALSE
consensus.independent.component.1174	-0.000146049	0.0765917	-0.00190685	0.998479	0.000661259	FALSE	FALSE	FALSE	FALSE	FALSE	FALSE	FALSE	FALSE	FALSE	FALSE	FALSE	FALSE	FALSE	FALSE	FALSE	FALSE	FALSE	FALSE	FALSE	FALSE		consensus.independent.component.1174	0.0272962	0.0851765	0.320466	0.748615	0.125742	FALSE	FALSE	FALSE	FALSE	FALSE	FALSE	FALSE	FALSE	FALSE	FALSE	FALSE	FALSE	FALSE	FALSE	FALSE	FALSE	FALSE
consensus.independent.component.1175	-0.0527902	0.0511628	-1.03181	0.302162	0.51976	FALSE	FALSE	FALSE	FALSE	FALSE	FALSE	FALSE	FALSE	FALSE	FALSE	FALSE	FALSE	FALSE	FALSE	FALSE	FALSE	FALSE	FALSE	FALSE	FALSE		consensus.independent.component.1175	-0.110953	0.0609078	-1.82166	0.0685064	1.16427	FALSE	FALSE	FALSE	FALSE	FALSE	FALSE	FALSE	FALSE	FALSE	FALSE	FALSE	FALSE	FALSE	FALSE	FALSE	FALSE	FALSE
consensus.independent.component.1184	0.0372987	0.0506182	0.736862	0.461206	0.336105	FALSE	FALSE	FALSE	FALSE	FALSE	FALSE	FALSE	FALSE	FALSE	FALSE	FALSE	FALSE	FALSE	FALSE	FALSE	FALSE	FALSE	FALSE	FALSE	FALSE		consensus.independent.component.1184	0.0417689	0.057557	0.725696	0.468025	0.329731	FALSE	FALSE	FALSE	FALSE	FALSE	FALSE	FALSE	FALSE	FALSE	FALSE	FALSE	FALSE	FALSE	FALSE	FALSE	FALSE	FALSE
consensus.independent.component.1187	-0.0381752	0.0775075	-0.492536	0.62234	0.205972	FALSE	FALSE	FALSE	FALSE	FALSE	FALSE	FALSE	FALSE	FALSE	FALSE	FALSE	FALSE	FALSE	FALSE	FALSE	FALSE	FALSE	FALSE	FALSE	FALSE		consensus.independent.component.1187	-0.072533	0.0899758	-0.806139	0.420163	0.376582	FALSE	FALSE	FALSE	FALSE	FALSE	FALSE	FALSE	FALSE	FALSE	FALSE	FALSE	FALSE	FALSE	FALSE	FALSE	FALSE	FALSE
consensus.independent.component.1189	-0.0220023	0.0669457	-0.328659	0.742414	0.129354	FALSE	FALSE	FALSE	FALSE	FALSE	FALSE	FALSE	FALSE	FALSE	FALSE	FALSE	FALSE	FALSE	FALSE	FALSE	FALSE	FALSE	FALSE	FALSE	FALSE		consensus.independent.component.1189	-0.0306188	0.0752886	-0.406687	0.684238	0.164793	FALSE	FALSE	FALSE	FALSE	FALSE	FALSE	FALSE	FALSE	FALSE	FALSE	FALSE	FALSE	FALSE	FALSE	FALSE	FALSE	FALSE
consensus.independent.component.1210	0.0266867	0.0499914	0.533826	0.593462	0.226607	FALSE	FALSE	FALSE	FALSE	FALSE	FALSE	FALSE	FALSE	FALSE	FALSE	FALSE	FALSE	FALSE	FALSE	FALSE	FALSE	FALSE	FALSE	FALSE	FALSE		consensus.independent.component.1210	0.0243449	0.0553538	0.439806	0.660078	0.180405	FALSE	FALSE	FALSE	FALSE	FALSE	FALSE	FALSE	FALSE	FALSE	FALSE	FALSE	FALSE	FALSE	FALSE	FALSE	FALSE	FALSE
consensus.independent.component.1214	0.0326316	0.0757535	0.430761	0.666642	0.176107	FALSE	FALSE	FALSE	FALSE	FALSE	FALSE	FALSE	FALSE	FALSE	FALSE	FALSE	FALSE	FALSE	FALSE	FALSE	FALSE	FALSE	FALSE	FALSE	FALSE		consensus.independent.component.1214	0.0335847	0.0857476	0.39167	0.695302	0.157826	FALSE	FALSE	FALSE	FALSE	FALSE	FALSE	FALSE	FALSE	FALSE	FALSE	FALSE	FALSE	FALSE	FALSE	FALSE	FALSE	FALSE
consensus.independent.component.1224	-0.0511838	0.0755054	-0.677882	0.497846	0.302905	FALSE	FALSE	FALSE	FALSE	FALSE	FALSE	FALSE	FALSE	FALSE	FALSE	FALSE	FALSE	FALSE	FALSE	FALSE	FALSE	FALSE	FALSE	FALSE	FALSE		consensus.independent.component.1224	-0.101536	0.0900515	-1.12753	0.259519	0.585831	FALSE	FALSE	FALSE	FALSE	FALSE	FALSE	FALSE	FALSE	FALSE	FALSE	FALSE	FALSE	FALSE	FALSE	FALSE	FALSE	FALSE
consensus.independent.component.1225	0.14943	0.0783482	1.90726	0.0564874	1.24805	FALSE	FALSE	FALSE	FALSE	FALSE	FALSE	FALSE	FALSE	FALSE	FALSE	FALSE	FALSE	FALSE	FALSE	FALSE	FALSE	FALSE	FALSE	FALSE	FALSE		consensus.independent.component.1225	0.108586	0.0889507	1.22074	0.222184	0.653288	FALSE	FALSE	FALSE	FALSE	FALSE	FALSE	FALSE	FALSE	FALSE	FALSE	FALSE	FALSE	FALSE	FALSE	FALSE	FALSE	FALSE
consensus.independent.component.1238	-0.161996	0.0716687	-2.26034	0.0238003	1.62342	TRUE	TRUE	TRUE	TRUE	TRUE	TRUE	TRUE	TRUE	TRUE	TRUE	TRUE	TRUE	TRUE	TRUE	TRUE	TRUE	TRUE	TRUE	TRUE	TRUE		consensus.independent.component.1238	-0.178965	0.08065	-2.21903	0.0264847	1.57701	FALSE	FALSE	FALSE	FALSE	FALSE	FALSE	FALSE	FALSE	FALSE	FALSE	FALSE	FALSE	FALSE	FALSE	FALSE	FALSE	FALSE
consensus.independent.component.1257	0.000138317	0.0708977	0.00195094	0.998443	0.000676561	FALSE	FALSE	FALSE	FALSE	FALSE	FALSE	FALSE	FALSE	FALSE	FALSE	FALSE	FALSE	FALSE	FALSE	FALSE	FALSE	FALSE	FALSE	FALSE	FALSE		consensus.independent.component.1257	-0.0076236	0.0854909	-0.0891744	0.928943	0.0320108	FALSE	FALSE	FALSE	FALSE	FALSE	FALSE	FALSE	FALSE	FALSE	FALSE	FALSE	FALSE	FALSE	FALSE	FALSE	FALSE	FALSE
[truncated: 3 more columns]

## Sheet: TCs <> PFS (F2,SF1)
UNIVARIATE PFS																																MULTIVARIATE PFS
	coef	exp(coef)	se(coef)	z	Pr(>|z|)	exp(coef)	exp(-coef)	lower .95	upper .95	mlogpva	MVP_reject_H0 nPerm= 10000 FDR= 0.01 conf= 0.99	MVP_reject_H0 nPerm= 10000 FDR= 0.01 conf= 0.95	MVP_reject_H0 nPerm= 10000 FDR= 0.01 conf= 0.9	MVP_reject_H0 nPerm= 10000 FDR= 0.01 conf= 0.85	MVP_reject_H0 nPerm= 10000 FDR= 0.01 conf= 0.8	MVP_reject_H0 nPerm= 10000 FDR= 0.05 conf= 0.99	MVP_reject_H0 nPerm= 10000 FDR= 0.05 conf= 0.95	MVP_reject_H0 nPerm= 10000 FDR= 0.05 conf= 0.9	MVP_reject_H0 nPerm= 10000 FDR= 0.05 conf= 0.85	MVP_reject_H0 nPerm= 10000 FDR= 0.05 conf= 0.8	MVP_reject_H0 nPerm= 10000 FDR= 0.1 conf= 0.99	MVP_reject_H0 nPerm= 10000 FDR= 0.1 conf= 0.95	MVP_reject_H0 nPerm= 10000 FDR= 0.1 conf= 0.9	MVP_reject_H0 nPerm= 10000 FDR= 0.1 conf= 0.85	MVP_reject_H0 nPerm= 10000 FDR= 0.1 conf= 0.8	MVP_reject_H0 nPerm= 10000 FDR= 0.2 conf= 0.99	MVP_reject_H0 nPerm= 10000 FDR= 0.2 conf= 0.95	MVP_reject_H0 nPerm= 10000 FDR= 0.2 conf= 0.9	MVP_reject_H0 nPerm= 10000 FDR= 0.2 conf= 0.85	MVP_reject_H0 nPerm= 10000 FDR= 0.2 conf= 0.8		coef	exp(coef)	se(coef)	z	Pr(>|z|)	exp(coef)	exp(-coef)	lower .95	upper .95	mlogpva	MVP_reject_H0 nPerm= 10000 FDR= 0.01 conf= 0.99	MVP_reject_H0 nPerm= 10000 FDR= 0.01 conf= 0.95	MVP_reject_H0 nPerm= 10000 FDR= 0.01 conf= 0.9	MVP_reject_H0 nPerm= 10000 FDR= 0.01 conf= 0.8	MVP_reject_H0 nPerm= 10000 FDR= 0.01 conf= 0.5	MVP_reject_H0 nPerm= 10000 FDR= 0.05 conf= 0.99	MVP_reject_H0 nPerm= 10000 FDR= 0.05 conf= 0.95	MVP_reject_H0 nPerm= 10000 FDR= 0.05 conf= 0.9
consensus.independent.component.3	0.025635	1.02597	0.0170899	1.50001	0.133612	1.02597	0.974691	0.99217	1.06091	0.874155	FALSE	FALSE	FALSE	FALSE	FALSE	FALSE	FALSE	FALSE	FALSE	FALSE	FALSE	FALSE	FALSE	FALSE	FALSE	FALSE	FALSE	FALSE	FALSE	FALSE		consensus.independent.component.3	0.0217466	1.02198	0.0183015	1.18824	0.234739	1.02198	0.978488	0.985976	1.05931	0.629415	FALSE	FALSE	FALSE	FALSE	FALSE	FALSE	FALSE
consensus.independent.component.6	0.00687931	1.0069	0.0122285	0.562565	0.573731	1.0069	0.993144	0.983057	1.03133	0.241292	FALSE	FALSE	FALSE	FALSE	FALSE	FALSE	FALSE	FALSE	FALSE	FALSE	FALSE	FALSE	FALSE	FALSE	FALSE	FALSE	FALSE	FALSE	FALSE	FALSE		consensus.independent.component.6	0.0120173	1.01209	0.0122624	0.980011	0.327081	1.01209	0.988055	0.988055	1.03671	0.485345	FALSE	FALSE	FALSE	FALSE	FALSE	FALSE	FALSE
consensus.independent.component.7	0.0244071	1.02471	0.0184343	1.324	0.185502	1.02471	0.975888	0.988345	1.06241	0.73165	FALSE	FALSE	FALSE	FALSE	FALSE	FALSE	FALSE	FALSE	FALSE	FALSE	FALSE	FALSE	FALSE	FALSE	FALSE	FALSE	FALSE	FALSE	FALSE	FALSE		consensus.independent.component.7	0.0269179	1.02728	0.0198406	1.35671	0.174874	1.02728	0.973441	0.988102	1.06802	0.757276	FALSE	FALSE	FALSE	FALSE	FALSE	FALSE	FALSE
consensus.independent.component.8	0.0359836	1.03664	0.033163	1.08505	0.277898	1.03664	0.964656	0.971402	1.10626	0.556114	FALSE	FALSE	FALSE	FALSE	FALSE	FALSE	FALSE	FALSE	FALSE	FALSE	FALSE	FALSE	FALSE	FALSE	FALSE	FALSE	FALSE	FALSE	FALSE	FALSE		consensus.independent.component.8	0.0381627	1.0389	0.0394761	0.966729	0.333679	1.0389	0.962556	0.96155	1.12247	0.476671	FALSE	FALSE	FALSE	FALSE	FALSE	FALSE	FALSE
consensus.independent.component.9	-0.0152839	0.984832	0.0207278	-0.73736	0.460904	0.984832	1.0154	0.945625	1.02567	0.33639	FALSE	FALSE	FALSE	FALSE	FALSE	FALSE	FALSE	FALSE	FALSE	FALSE	FALSE	FALSE	FALSE	FALSE	FALSE	FALSE	FALSE	FALSE	FALSE	FALSE		consensus.independent.component.9	0.0114296	1.0115	0.0259711	0.440089	0.659873	1.0115	0.988635	0.961296	1.06432	0.18054	FALSE	FALSE	FALSE	FALSE	FALSE	FALSE	FALSE
consensus.independent.component.11	0.0178587	1.01802	0.0113731	1.57027	0.116353	1.01802	0.9823	0.995578	1.04097	0.934222	FALSE	FALSE	FALSE	FALSE	FALSE	FALSE	FALSE	FALSE	FALSE	FALSE	FALSE	FALSE	FALSE	FALSE	FALSE	FALSE	FALSE	FALSE	FALSE	FALSE		consensus.independent.component.11	0.0138058	1.0139	0.012201	1.13153	0.25783	1.0139	0.986289	0.989943	1.03844	0.588667	FALSE	FALSE	FALSE	FALSE	FALSE	FALSE	FALSE
consensus.independent.component.15	-0.0191788	0.981004	0.0292298	-0.65614	0.511734	0.981004	1.01936	0.926382	1.03885	0.290955	FALSE	FALSE	FALSE	FALSE	FALSE	FALSE	FALSE	FALSE	FALSE	FALSE	FALSE	FALSE	FALSE	FALSE	FALSE	FALSE	FALSE	FALSE	FALSE	FALSE		consensus.independent.component.15	-0.0156556	0.984466	0.03079	-0.508464	0.611128	0.984466	1.01578	0.926814	1.04571	0.213868	FALSE	FALSE	FALSE	FALSE	FALSE	FALSE	FALSE
consensus.independent.component.19	0.0194286	1.01962	0.0102094	1.90302	0.0570382	1.01962	0.980759	0.999419	1.04023	1.24383	FALSE	FALSE	FALSE	FALSE	FALSE	FALSE	FALSE	FALSE	FALSE	FALSE	FALSE	FALSE	FALSE	FALSE	FALSE	FALSE	FALSE	FALSE	FALSE	FALSE		consensus.independent.component.19	0.0265123	1.02687	0.0116039	2.28477	0.0223262	1.02687	0.973836	1.00378	1.05049	1.65119	FALSE	FALSE	FALSE	FALSE	FALSE	FALSE	FALSE
consensus.independent.component.28	0.0466901	1.0478	0.0362173	1.28917	0.19734	1.0478	0.954383	0.975998	1.12488	0.704784	FALSE	FALSE	FALSE	FALSE	FALSE	FALSE	FALSE	FALSE	FALSE	FALSE	FALSE	FALSE	FALSE	FALSE	FALSE	FALSE	FALSE	FALSE	FALSE	FALSE		consensus.independent.component.28	0.0549821	1.05652	0.037369	1.47133	0.141201	1.05652	0.946502	0.981906	1.13681	0.850161	FALSE	FALSE	FALSE	FALSE	FALSE	FALSE	FALSE
consensus.independent.component.51	0.00570422	1.00572	0.00851837	0.669638	0.503089	1.00572	0.994312	0.989069	1.02265	0.298356	FALSE	FALSE	FALSE	FALSE	FALSE	FALSE	FALSE	FALSE	FALSE	FALSE	FALSE	FALSE	FALSE	FALSE	FALSE	FALSE	FALSE	FALSE	FALSE	FALSE		consensus.independent.component.51	0.00819765	1.00823	0.00986996	0.830566	0.406219	1.00823	0.991836	0.988915	1.02793	0.39124	FALSE	FALSE	FALSE	FALSE	FALSE	FALSE	FALSE
consensus.independent.component.59	-0.0303875	0.97007	0.0286268	-1.06151	0.28846	0.97007	1.03085	0.91714	1.02605	0.539914	FALSE	FALSE	FALSE	FALSE	FALSE	FALSE	FALSE	FALSE	FALSE	FALSE	FALSE	FALSE	FALSE	FALSE	FALSE	FALSE	FALSE	FALSE	FALSE	FALSE		consensus.independent.component.59	-0.0378959	0.962813	0.0322198	-1.17617	0.239527	0.962813	1.03862	0.903892	1.02558	0.620645	FALSE	FALSE	FALSE	FALSE	FALSE	FALSE	FALSE
consensus.independent.component.73	-0.00853193	0.991504	0.0129549	-0.658588	0.510161	0.991504	1.00857	0.966646	1.017	0.292293	FALSE	FALSE	FALSE	FALSE	FALSE	FALSE	FALSE	FALSE	FALSE	FALSE	FALSE	FALSE	FALSE	FALSE	FALSE	FALSE	FALSE	FALSE	FALSE	FALSE		consensus.independent.component.73	-0.0106633	0.989393	0.0153444	-0.69493	0.487099	0.989393	1.01072	0.960081	1.0196	0.312382	FALSE	FALSE	FALSE	FALSE	FALSE	FALSE	FALSE
consensus.independent.component.93	0.0701676	1.07269	0.0478322	1.46695	0.142389	1.07269	0.932238	0.976694	1.17812	0.846524	FALSE	FALSE	FALSE	FALSE	FALSE	FALSE	FALSE	FALSE	FALSE	FALSE	FALSE	FALSE	FALSE	FALSE	FALSE	FALSE	FALSE	FALSE	FALSE	FALSE		consensus.independent.component.93	0.0150493	1.01516	0.0519	0.289966	0.771842	1.01516	0.985063	0.916977	1.12386	0.112472	FALSE	FALSE	FALSE	FALSE	FALSE	FALSE	FALSE
consensus.independent.component.100	-0.00911167	0.99093	0.00836136	-1.08974	0.27583	0.99093	1.00915	0.974823	1.0073	0.559359	FALSE	FALSE	FALSE	FALSE	FALSE	FALSE	FALSE	FALSE	FALSE	FALSE	FALSE	FALSE	FALSE	FALSE	FALSE	FALSE	FALSE	FALSE	FALSE	FALSE		consensus.independent.component.100	-0.0096197	0.990426	0.00858309	-1.12077	0.262384	0.990426	1.00967	0.973904	1.00723	0.581063	FALSE	FALSE	FALSE	FALSE	FALSE	FALSE	FALSE
consensus.independent.component.168	-0.017163	0.982983	0.0424791	-0.404034	0.686188	0.982983	1.01731	0.904457	1.06833	0.163557	FALSE	FALSE	FALSE	FALSE	FALSE	FALSE	FALSE	FALSE	FALSE	FALSE	FALSE	FALSE	FALSE	FALSE	FALSE	FALSE	FALSE	FALSE	FALSE	FALSE		consensus.independent.component.168	0.0260171	1.02636	0.0458309	0.567677	0.570255	1.02636	0.974318	0.938183	1.12282	0.243931	FALSE	FALSE	FALSE	FALSE	FALSE	FALSE	FALSE
consensus.independent.component.190	-0.0252978	0.97502	0.0388067	-0.651892	0.514471	0.97502	1.02562	0.90361	1.05207	0.288639	FALSE	FALSE	FALSE	FALSE	FALSE	FALSE	FALSE	FALSE	FALSE	FALSE	FALSE	FALSE	FALSE	FALSE	FALSE	FALSE	FALSE	FALSE	FALSE	FALSE		consensus.independent.component.190	-0.0288596	0.971553	0.0416221	-0.693372	0.488076	0.971553	1.02928	0.895442	1.05413	0.311512	FALSE	FALSE	FALSE	FALSE	FALSE	FALSE	FALSE
consensus.independent.component.299	-0.0105058	0.989549	0.0368511	-0.285087	0.775577	0.989549	1.01056	0.920597	1.06367	0.110375	FALSE	FALSE	FALSE	FALSE	FALSE	FALSE	FALSE	FALSE	FALSE	FALSE	FALSE	FALSE	FALSE	FALSE	FALSE	FALSE	FALSE	FALSE	FALSE	FALSE		consensus.independent.component.299	-0.00776652	0.992264	0.0392841	-0.197701	0.843279	0.992264	1.0078	0.918731	1.07168	0.0740288	FALSE	FALSE	FALSE	FALSE	FALSE	FALSE	FALSE
consensus.independent.component.331	-0.0492838	0.951911	0.0373588	-1.3192	0.187101	0.951911	1.05052	0.884701	1.02423	0.727923	FALSE	FALSE	FALSE	FALSE	FALSE	FALSE	FALSE	FALSE	FALSE	FALSE	FALSE	FALSE	FALSE	FALSE	FALSE	FALSE	FALSE	FALSE	FALSE	FALSE		consensus.independent.component.331	-0.0576067	0.944021	0.040304	-1.4293	0.152917	0.944021	1.0593	0.872318	1.02162	0.815543	FALSE	FALSE	FALSE	FALSE	FALSE	FALSE	FALSE
consensus.independent.component.341	-0.045403	0.955612	0.0406261	-1.11758	0.263745	0.955612	1.04645	0.882472	1.03481	0.578816	FALSE	FALSE	FALSE	FALSE	FALSE	FALSE	FALSE	FALSE	FALSE	FALSE	FALSE	FALSE	FALSE	FALSE	FALSE	FALSE	FALSE	FALSE	FALSE	FALSE		consensus.independent.component.341	-0.0263634	0.973981	0.0418062	-0.63061	0.528296	0.973981	1.02671	0.897357	1.05715	0.277123	FALSE	FALSE	FALSE	FALSE	FALSE	FALSE	FALSE
consensus.independent.component.351	-0.014889	0.985221	0.0227577	-0.65424	0.512957	0.985221	1.015	0.942242	1.03016	0.289919	FALSE	FALSE	FALSE	FALSE	FALSE	FALSE	FALSE	FALSE	FALSE	FALSE	FALSE	FALSE	FALSE	FALSE	FALSE	FALSE	FALSE	FALSE	FALSE	FALSE		consensus.independent.component.351	0.0108802	1.01094	0.0267833	0.406232	0.684572	1.01094	0.989179	0.95924	1.06543	0.164581	FALSE	FALSE	FALSE	FALSE	FALSE	FALSE	FALSE
consensus.independent.component.388	-0.0211179	0.979104	0.0275148	-0.767511	0.442777	0.979104	1.02134	0.927701	1.03335	0.353814	FALSE	FALSE	FALSE	FALSE	FALSE	FALSE	FALSE	FALSE	FALSE	FALSE	FALSE	FALSE	FALSE	FALSE	FALSE	FALSE	FALSE	FALSE	FALSE	FALSE		consensus.independent.component.388	-0.0272547	0.973113	0.0296872	-0.918062	0.358587	0.973113	1.02763	0.918108	1.03141	0.445406	FALSE	FALSE	FALSE	FALSE	FALSE	FALSE	FALSE
consensus.independent.component.398	-0.00225192	0.997751	0.010347	-0.217641	0.827709	0.997751	1.00225	0.97772	1.01819	0.0821222	FALSE	FALSE	FALSE	FALSE	FALSE	FALSE	FALSE	FALSE	FALSE	FALSE	FALSE	FALSE	FALSE	FALSE	FALSE	FALSE	FALSE	FALSE	FALSE	FALSE		consensus.independent.component.398	0.00578762	1.0058	0.011526	0.502137	0.615571	1.0058	0.994229	0.983337	1.02878	0.210722	FALSE	FALSE	FALSE	FALSE	FALSE	FALSE	FALSE
consensus.independent.component.499	0.00937516	1.00942	0.0318878	0.294004	0.768755	1.00942	0.990669	0.948263	1.07452	0.114212	FALSE	FALSE	FALSE	FALSE	FALSE	FALSE	FALSE	FALSE	FALSE	FALSE	FALSE	FALSE	FALSE	FALSE	FALSE	FALSE	FALSE	FALSE	FALSE	FALSE		consensus.independent.component.499	0.0649214	1.06708	0.0407414	1.5935	0.111049	1.06708	0.937141	0.985181	1.15578	0.954487	FALSE	FALSE	FALSE	FALSE	FALSE	FALSE	FALSE
consensus.independent.component.525	0.0139385	1.01404	0.00953971	1.46111	0.143986	1.01404	0.986158	0.995252	1.03317	0.84168	FALSE	FALSE	FALSE	FALSE	FALSE	FALSE	FALSE	FALSE	FALSE	FALSE	FALSE	FALSE	FALSE	FALSE	FALSE	FALSE	FALSE	FALSE	FALSE	FALSE		consensus.independent.component.525	0.0111539	1.01122	0.00992892	1.12337	0.26128	1.01122	0.988908	0.991728	1.03109	0.582894	FALSE	FALSE	FALSE	FALSE	FALSE	FALSE	FALSE
consensus.independent.component.551	-0.0306781	0.969788	0.039922	-0.768452	0.442219	0.969788	1.03115	0.896799	1.04872	0.354363	FALSE	FALSE	FALSE	FALSE	FALSE	FALSE	FALSE	FALSE	FALSE	FALSE	FALSE	FALSE	FALSE	FALSE	FALSE	FALSE	FALSE	FALSE	FALSE	FALSE		consensus.independent.component.551	-0.000432212	0.999568	0.0447726	-0.0096535	0.992298	0.999568	1.00043	0.915592	1.09125	0.003358	FALSE	FALSE	FALSE	FALSE	FALSE	FALSE	FALSE
consensus.independent.component.671	0.0405061	1.04134	0.0330604	1.22521	0.220495	1.04134	0.960303	0.976001	1.11105	0.656601	FALSE	FALSE	FALSE	FALSE	FALSE	FALSE	FALSE	FALSE	FALSE	FALSE	FALSE	FALSE	FALSE	FALSE	FALSE	FALSE	FALSE	FALSE	FALSE	FALSE		consensus.independent.component.671	0.0700647	1.07258	0.0343145	2.04184	0.0411674	1.07258	0.932334	1.00281	1.14719	1.38545	FALSE	FALSE	FALSE	FALSE	FALSE	FALSE	FALSE
consensus.independent.component.733	0.0459359	1.04701	0.043122	1.06525	0.286761	1.04701	0.955103	0.962153	1.13935	0.542479	FALSE	FALSE	FALSE	FALSE	FALSE	FALSE	FALSE	FALSE	FALSE	FALSE	FALSE	FALSE	FALSE	FALSE	FALSE	FALSE	FALSE	FALSE	FALSE	FALSE		consensus.independent.component.733	0.0550306	1.05657	0.0469601	1.17186	0.241254	1.05657	0.946456	0.963667	1.15844	0.617525	FALSE	FALSE	FALSE	FALSE	FALSE	FALSE	FALSE
consensus.independent.component.734	0.0197484	1.01994	0.0378843	0.521282	0.60217	1.01994	0.980445	0.946955	1.09856	0.220281	FALSE	FALSE	FALSE	FALSE	FALSE	FALSE	FALSE	FALSE	FALSE	FALSE	FALSE	FALSE	FALSE	FALSE	FALSE	FALSE	FALSE	FALSE	FALSE	FALSE		consensus.independent.component.734	0.0691048	1.07155	0.0422824	1.63436	0.102182	1.07155	0.933229	0.986327	1.16413	0.990625	FALSE	FALSE	FALSE	FALSE	FALSE	FALSE	FALSE
consensus.independent.component.757	0.0065263	1.00655	0.0319102	0.204521	0.837946	1.00655	0.993495	0.945524	1.07151	0.0767838	FALSE	FALSE	FALSE	FALSE	FALSE	FALSE	FALSE	FALSE	FALSE	FALSE	FALSE	FALSE	FALSE	FALSE	FALSE	FALSE	FALSE	FALSE	FALSE	FALSE		consensus.independent.component.757	-0.00833508	0.9917	0.0336905	-0.247401	0.804598	0.9917	1.00837	0.928331	1.05939	0.0944212	FALSE	FALSE	FALSE	FALSE	FALSE	FALSE	FALSE
consensus.independent.component.785	-0.0477553	0.953367	0.0478514	-0.997991	0.318284	0.953367	1.04891	0.868018	1.04711	0.497185	FALSE	FALSE	FALSE	FALSE	FALSE	FALSE	FALSE	FALSE	FALSE	FALSE	FALSE	FALSE	FALSE	FALSE	FALSE	FALSE	FALSE	FALSE	FALSE	FALSE		consensus.independent.component.785	-0.0859328	0.917656	0.0559144	-1.53686	0.124327	0.917656	1.08973	0.822404	1.02394	0.905436	FALSE	FALSE	FALSE	FALSE	FALSE	FALSE	FALSE
consensus.independent.component.792	0.0296653	1.03011	0.0138386	2.14366	0.0320604	1.03011	0.97077	1.00255	1.05843	1.49403	FALSE	FALSE	FALSE	FALSE	FALSE	FALSE	FALSE	FALSE	FALSE	FALSE	FALSE	FALSE	FALSE	FALSE	FALSE	FALSE	FALSE	FALSE	FALSE	FALSE		consensus.independent.component.792	0.035742	1.03639	0.0143351	2.49333	0.012655	1.03639	0.964889	1.00768	1.06592	1.89774	FALSE	FALSE	FALSE	FALSE	FALSE	FALSE	FALSE
consensus.independent.component.793	0.0222138	1.02246	0.0151204	1.46912	0.141799	1.02246	0.978031	0.992606	1.05322	0.848327	FALSE	FALSE	FALSE	FALSE	FALSE	FALSE	FALSE	FALSE	FALSE	FALSE	FALSE	FALSE	FALSE	FALSE	FALSE	FALSE	FALSE	FALSE	FALSE	FALSE		consensus.independent.component.793	0.0430877	1.04403	0.0174764	2.46548	0.0136829	1.04403	0.957827	1.00887	1.08041	1.86382	FALSE	FALSE	FALSE	FALSE	FALSE	FALSE	FALSE
consensus.independent.component.807	0.00591747	1.00594	0.0309223	0.191366	0.848239	1.00594	0.9941	0.946779	1.06879	0.0714818	FALSE	FALSE	FALSE	FALSE	FALSE	FALSE	FALSE	FALSE	FALSE	FALSE	FALSE	FALSE	FALSE	FALSE	FALSE	FALSE	FALSE	FALSE	FALSE	FALSE		consensus.independent.component.807	0.0615597	1.06349	0.0410494	1.49965	0.133705	1.06349	0.940297	0.981282	1.15259	0.873851	FALSE	FALSE	FALSE	FALSE	FALSE	FALSE	FALSE
consensus.independent.component.822	0.00277042	1.00277	0.0405496	0.0683218	0.945529	1.00277	0.997233	0.926163	1.08572	0.0243249	FALSE	FALSE	FALSE	FALSE	FALSE	FALSE	FALSE	FALSE	FALSE	FALSE	FALSE	FALSE	FALSE	FALSE	FALSE	FALSE	FALSE	FALSE	FALSE	FALSE		consensus.independent.component.822	-0.0135661	0.986526	0.0438369	-0.309467	0.756967	0.986526	1.01366	0.905304	1.07503	0.120923	FALSE	FALSE	FALSE	FALSE	FALSE	FALSE	FALSE
consensus.independent.component.849	0.0250748	1.02539	0.0122282	2.05058	0.0403082	1.02539	0.975237	1.00111	1.05026	1.39461	FALSE	FALSE	FALSE	FALSE	FALSE	FALSE	FALSE	FALSE	FALSE	FALSE	FALSE	FALSE	FALSE	FALSE	FALSE	FALSE	FALSE	FALSE	FALSE	FALSE		consensus.independent.component.849	0.014282	1.01438	0.0142365	1.0032	0.315765	1.01438	0.985819	0.986471	1.04309	0.500637	FALSE	FALSE	FALSE	FALSE	FALSE	FALSE	FALSE
consensus.independent.component.865	0.0582169	1.05994	0.0398413	1.46122	0.143954	1.05994	0.943445	0.980326	1.14603	0.841775	FALSE	FALSE	FALSE	FALSE	FALSE	FALSE	FALSE	FALSE	FALSE	FALSE	FALSE	FALSE	FALSE	FALSE	FALSE	FALSE	FALSE	FALSE	FALSE	FALSE		consensus.independent.component.865	0.10834	1.11443	0.0431226	2.51237	0.0119923	1.11443	0.897322	1.02411	1.21271	1.9211	TRUE	TRUE	TRUE	TRUE	TRUE	TRUE	TRUE
consensus.independent.component.882	-0.010973	0.989087	0.042404	-0.258772	0.795811	0.989087	1.01103	0.910207	1.0748	0.09919	FALSE	FALSE	FALSE	FALSE	FALSE	FALSE	FALSE	FALSE	FALSE	FALSE	FALSE	FALSE	FALSE	FALSE	FALSE	FALSE	FALSE	FALSE	FALSE	FALSE		consensus.independent.component.882	-0.0147669	0.985342	0.0448929	-0.328937	0.742203	0.985342	1.01488	0.902348	1.07597	0.129477	FALSE	FALSE	FALSE	FALSE	FALSE	FALSE	FALSE
consensus.independent.component.888	-0.0200664	0.980134	0.0398677	-0.503325	0.614736	0.980134	1.02027	0.906462	1.05979	0.211312	FALSE	FALSE	FALSE	FALSE	FALSE	FALSE	FALSE	FALSE	FALSE	FALSE	FALSE	FALSE	FALSE	FALSE	FALSE	FALSE	FALSE	FALSE	FALSE	FALSE		consensus.independent.component.888	-0.0188352	0.981341	0.0427911	-0.440166	0.659817	0.981341	1.01901	0.902394	1.0672	0.180576	FALSE	FALSE	FALSE	FALSE	FALSE	FALSE	FALSE
consensus.independent.component.918	0.0105529	1.01061	0.0330976	0.318842	0.749846	1.01061	0.989503	0.947132	1.07834	0.125028	FALSE	FALSE	FALSE	FALSE	FALSE	FALSE	FALSE	FALSE	FALSE	FALSE	FALSE	FALSE	FALSE	FALSE	FALSE	FALSE	FALSE	FALSE	FALSE	FALSE		consensus.independent.component.918	0.0255831	1.02591	0.0356245	0.718132	0.472676	1.02591	0.974741	0.956725	1.10011	0.325437	FALSE	FALSE	FALSE	FALSE	FALSE	FALSE	FALSE
consensus.independent.component.920	0.0273267	1.0277	0.0331822	0.823534	0.410204	1.0277	0.973043	0.962993	1.09676	0.387	FALSE	FALSE	FALSE	FALSE	FALSE	FALSE	FALSE	FALSE	FALSE	FALSE	FALSE	FALSE	FALSE	FALSE	FALSE	FALSE	FALSE	FALSE	FALSE	FALSE		consensus.independent.component.920	0.0620635	1.06403	0.034687	1.78925	0.0735752	1.06403	0.939823	0.994096	1.13888	1.13327	FALSE	FALSE	FALSE	FALSE	FALSE	FALSE	FALSE
consensus.independent.component.921	-0.0183321	0.981835	0.0371305	-0.49372	0.621504	0.981835	1.0185	0.91292	1.05595	0.206556	FALSE	FALSE	FALSE	FALSE	FALSE	FALSE	FALSE	FALSE	FALSE	FALSE	FALSE	FALSE	FALSE	FALSE	FALSE	FALSE	FALSE	FALSE	FALSE	FALSE		consensus.independent.component.921	-0.000504589	0.999496	0.0401845	-0.0125568	0.989981	0.999496	1.0005	0.923795	1.0814	0.00437297	FALSE	FALSE	FALSE	FALSE	FALSE	FALSE	FALSE
consensus.independent.component.943	-0.0234522	0.976821	0.0332419	-0.705503	0.480498	0.976821	1.02373	0.915207	1.04258	0.318309	FALSE	FALSE	FALSE	FALSE	FALSE	FALSE	FALSE	FALSE	FALSE	FALSE	FALSE	FALSE	FALSE	FALSE	FALSE	FALSE	FALSE	FALSE	FALSE	FALSE		consensus.independent.component.943	-0.027192	0.973174	0.0346557	-0.784634	0.432668	0.973174	1.02757	0.909268	1.04157	0.363845	FALSE	FALSE	FALSE	FALSE	FALSE	FALSE	FALSE
consensus.independent.component.944	-0.0241156	0.976173	0.0411742	-0.585697	0.558079	0.976173	1.02441	0.900491	1.05822	0.253304	FALSE	FALSE	FALSE	FALSE	FALSE	FALSE	FALSE	FALSE	FALSE	FALSE	FALSE	FALSE	FALSE	FALSE	FALSE	FALSE	FALSE	FALSE	FALSE	FALSE		consensus.independent.component.944	-0.0198864	0.98031	0.0435283	-0.456862	0.647771	0.98031	1.02009	0.900144	1.06762	0.188579	FALSE	FALSE	FALSE	FALSE	FALSE	FALSE	FALSE
consensus.independent.component.959	-0.0157539	0.98437	0.0431371	-0.365204	0.714959	0.98437	1.01588	0.904565	1.07121	0.145719	FALSE	FALSE	FALSE	FALSE	FALSE	FALSE	FALSE	FALSE	FALSE	FALSE	FALSE	FALSE	FALSE	FALSE	FALSE	FALSE	FALSE	FALSE	FALSE	FALSE		consensus.independent.component.959	-0.00941236	0.990632	0.0470273	-0.200147	0.841366	0.990632	1.00946	0.903405	1.08628	0.0750152	FALSE	FALSE	FALSE	FALSE	FALSE	FALSE	FALSE
consensus.independent.component.976	0.0456015	1.04666	0.0405458	1.12469	0.26072	1.04666	0.955423	0.9667	1.13323	0.583825	FALSE	FALSE	FALSE	FALSE	FALSE	FALSE	FALSE	FALSE	FALSE	FALSE	FALSE	FALSE	FALSE	FALSE	FALSE	FALSE	FALSE	FALSE	FALSE	FALSE		consensus.independent.component.976	0.03814	1.03888	0.0455665	0.837018	0.402583	1.03888	0.962578	0.950118	1.13593	0.395145	FALSE	FALSE	FALSE	FALSE	FALSE	FALSE	FALSE
consensus.independent.component.977	0.036035	1.03669	0.0437932	0.822846	0.410595	1.03669	0.964606	0.951422	1.12961	0.386586	FALSE	FALSE	FALSE	FALSE	FALSE	FALSE	FALSE	FALSE	FALSE	FALSE	FALSE	FALSE	FALSE	FALSE	FALSE	FALSE	FALSE	FALSE	FALSE	FALSE		consensus.independent.component.977	0.0699296	1.07243	0.0483842	1.4453	0.148374	1.07243	0.932459	0.975406	1.17911	0.828642	FALSE	FALSE	FALSE	FALSE	FALSE	FALSE	FALSE
consensus.independent.component.1041	0.00748552	1.00751	0.0387679	0.193085	0.846892	1.00751	0.992542	0.933795	1.08705	0.0721719	FALSE	FALSE	FALSE	FALSE	FALSE	FALSE	FALSE	FALSE	FALSE	FALSE	FALSE	FALSE	FALSE	FALSE	FALSE	FALSE	FALSE	FALSE	FALSE	FALSE		consensus.independent.component.1041	0.0414178	1.04229	0.039705	1.04314	0.296884	1.04229	0.959428	0.964252	1.12664	0.527413	FALSE	FALSE	FALSE	FALSE	FALSE	FALSE	FALSE
consensus.independent.component.1052	-0.0396078	0.961166	0.0384649	-1.02971	0.303144	0.961166	1.0404	0.891368	1.03643	0.51835	FALSE	FALSE	FALSE	FALSE	FALSE	FALSE	FALSE	FALSE	FALSE	FALSE	FALSE	FALSE	FALSE	FALSE	FALSE	FALSE	FALSE	FALSE	FALSE	FALSE		consensus.independent.component.1052	-0.0660827	0.936053	0.0406893	-1.62408	0.104359	0.936053	1.06832	0.864303	1.01376	0.981472	FALSE	FALSE	FALSE	FALSE	FALSE	FALSE	FALSE
consensus.independent.component.1057	-0.028918	0.971496	0.0339263	-0.852375	0.394006	0.971496	1.02934	0.908998	1.03829	0.404497	FALSE	FALSE	FALSE	FALSE	FALSE	FALSE	FALSE	FALSE	FALSE	FALSE	FALSE	FALSE	FALSE	FALSE	FALSE	FALSE	FALSE	FALSE	FALSE	FALSE		consensus.independent.component.1057	-0.0147546	0.985354	0.0369369	-0.399453	0.689559	0.985354	1.01486	0.91654	1.05933	0.161428	FALSE	FALSE	FALSE	FALSE	FALSE	FALSE	FALSE
consensus.independent.component.1093	0.021399	1.02163	0.0274849	0.778573	0.436231	1.02163	0.978828	0.968051	1.07817	0.360283	FALSE	FALSE	FALSE	FALSE	FALSE	FALSE	FALSE	FALSE	FALSE	FALSE	FALSE	FALSE	FALSE	FALSE	FALSE	FALSE	FALSE	FALSE	FALSE	FALSE		consensus.independent.component.1093	0.0308996	1.03138	0.0289005	1.06917	0.284991	1.03138	0.969573	0.974584	1.09149	0.545169	FALSE	FALSE	FALSE	FALSE	FALSE	FALSE	FALSE
consensus.independent.component.1099	-0.0277627	0.972619	0.0381537	-0.727655	0.466825	0.972619	1.02815	0.90254	1.04814	0.330846	FALSE	FALSE	FALSE	FALSE	FALSE	FALSE	FALSE	FALSE	FALSE	FALSE	FALSE	FALSE	FALSE	FALSE	FALSE	FALSE	FALSE	FALSE	FALSE	FALSE		consensus.independent.component.1099	-0.0299761	0.970469	0.0416584	-0.71957	0.47179	0.970469	1.03043	0.89438	1.05303	0.326251	FALSE	FALSE	FALSE	FALSE	FALSE	FALSE	FALSE
consensus.independent.component.1109	-0.00276024	0.997244	0.0140415	-0.196578	0.844158	0.997244	1.00276	0.970173	1.02507	0.0735763	FALSE	FALSE	FALSE	FALSE	FALSE	FALSE	FALSE	FALSE	FALSE	FALSE	FALSE	FALSE	FALSE	FALSE	FALSE	FALSE	FALSE	FALSE	FALSE	FALSE		consensus.independent.component.1109	-0.00471158	0.9953	0.0145985	-0.322744	0.746889	0.9953	1.00472	0.967225	1.02419	0.126744	FALSE	FALSE	FALSE	FALSE	FALSE	FALSE	FALSE
consensus.independent.component.1125	-0.0611776	0.940656	0.0352295	-1.73655	0.0824675	0.940656	1.06309	0.877897	1.0079	1.08372	FALSE	FALSE	FALSE	FALSE	FALSE	FALSE	FALSE	FALSE	FALSE	FALSE	FALSE	FALSE	FALSE	FALSE	FALSE	FALSE	FALSE	FALSE	FALSE	FALSE		consensus.independent.component.1125	-0.0563941	0.945167	0.0365202	-1.54419	0.122542	0.945167	1.05801	0.879878	1.0153	0.911714	FALSE	FALSE	FALSE	FALSE	FALSE	FALSE	FALSE
consensus.independent.component.1127	0.0578116	1.05952	0.0405661	1.42512	0.154123	1.05952	0.943828	0.978537	1.14719	0.812134	FALSE	FALSE	FALSE	FALSE	FALSE	FALSE	FALSE	FALSE	FALSE	FALSE	FALSE	FALSE	FALSE	FALSE	FALSE	FALSE	FALSE	FALSE	FALSE	FALSE		consensus.independent.component.1127	0.0824804	1.08598	0.0442271	1.86493	0.0621913	1.08598	0.920829	0.995806	1.18431	1.20627	FALSE	FALSE	FALSE	FALSE	FALSE	FALSE	FALSE
consensus.independent.component.1148	0.00585536	1.00587	0.0431036	0.135844	0.891945	1.00587	0.994162	0.924386	1.09454	0.0496621	FALSE	FALSE	FALSE	FALSE	FALSE	FALSE	FALSE	FALSE	FALSE	FALSE	FALSE	FALSE	FALSE	FALSE	FALSE	FALSE	FALSE	FALSE	FALSE	FALSE		consensus.independent.component.1148	-0.00461433	0.995396	0.0442935	-0.104176	0.917029	0.995396	1.00462	0.912627	1.08567	0.0376168	FALSE	FALSE	FALSE	FALSE	FALSE	FALSE	FALSE
consensus.independent.component.1151	0.0340767	1.03466	0.0270564	1.25947	0.207862	1.03466	0.966497	0.981226	1.09101	0.682225	FALSE	FALSE	FALSE	FALSE	FALSE	FALSE	FALSE	FALSE	FALSE	FALSE	FALSE	FALSE	FALSE	FALSE	FALSE	FALSE	FALSE	FALSE	FALSE	FALSE		consensus.independent.component.1151	0.0339718	1.03456	0.028978	1.17233	0.241063	1.03456	0.966599	0.977435	1.09501	0.617869	FALSE	FALSE	FALSE	FALSE	FALSE	FALSE	FALSE
consensus.independent.component.1154	0.0170099	1.01716	0.0346033	0.491569	0.623024	1.01716	0.983134	0.950458	1.08853	0.205495	FALSE	FALSE	FALSE	FALSE	FALSE	FALSE	FALSE	FALSE	FALSE	FALSE	FALSE	FALSE	FALSE	FALSE	FALSE	FALSE	FALSE	FALSE	FALSE	FALSE		consensus.independent.component.1154	0.0329308	1.03348	0.0355966	0.925111	0.354908	1.03348	0.967606	0.963833	1.10816	0.449884	FALSE	FALSE	FALSE	FALSE	FALSE	FALSE	FALSE
consensus.independent.component.1166	0.00194049	1.00194	0.0286081	0.0678299	0.945921	1.00194	0.998061	0.947309	1.05973	0.0241451	FALSE	FALSE	FALSE	FALSE	FALSE	FALSE	FALSE	FALSE	FALSE	FALSE	FALSE	FALSE	FALSE	FALSE	FALSE	FALSE	FALSE	FALSE	FALSE	FALSE		consensus.independent.component.1166	-0.014899	0.985211	0.0302381	-0.492724	0.622208	0.985211	1.01501	0.928519	1.04537	0.206065	FALSE	FALSE	FALSE	FALSE	FALSE	FALSE	FALSE
consensus.independent.component.1170	-0.0203506	0.979855	0.0420262	-0.484236	0.628218	0.979855	1.02056	0.902379	1.06398	0.20189	FALSE	FALSE	FALSE	FALSE	FALSE	FALSE	FALSE	FALSE	FALSE	FALSE	FALSE	FALSE	FALSE	FALSE	FALSE	FALSE	FALSE	FALSE	FALSE	FALSE		consensus.independent.component.1170	-0.0334957	0.967059	0.0487508	-0.68708	0.492032	0.967059	1.03406	0.878934	1.06402	0.308007	FALSE	FALSE	FALSE	FALSE	FALSE	FALSE	FALSE
consensus.independent.component.1174	0.0111317	1.01119	0.0447026	0.249017	0.803348	1.01119	0.98893	0.926368	1.10379	0.0950965	FALSE	FALSE	FALSE	FALSE	FALSE	FALSE	FALSE	FALSE	FALSE	FALSE	FALSE	FALSE	FALSE	FALSE	FALSE	FALSE	FALSE	FALSE	FALSE	FALSE		consensus.independent.component.1174	-0.0151032	0.98501	0.0471183	-0.320538	0.74856	0.98501	1.01522	0.898118	1.08031	0.125773	FALSE	FALSE	FALSE	FALSE	FALSE	FALSE	FALSE
consensus.independent.component.1175	0.0269603	1.02733	0.0294224	0.91632	0.359499	1.02733	0.9734	0.96976	1.08831	0.444302	FALSE	FALSE	FALSE	FALSE	FALSE	FALSE	FALSE	FALSE	FALSE	FALSE	FALSE	FALSE	FALSE	FALSE	FALSE	FALSE	FALSE	FALSE	FALSE	FALSE		consensus.independent.component.1175	0.0608588	1.06275	0.0312635	1.94664	0.0515779	1.06275	0.940956	0.999584	1.12991	1.28754	FALSE	FALSE	FALSE	FALSE	FALSE	FALSE	FALSE
consensus.independent.component.1184	-0.00862964	0.991407	0.0291107	-0.296442	0.766893	0.991407	1.00867	0.936425	1.04962	0.115265	FALSE	FALSE	FALSE	FALSE	FALSE	FALSE	FALSE	FALSE	FALSE	FALSE	FALSE	FALSE	FALSE	FALSE	FALSE	FALSE	FALSE	FALSE	FALSE	FALSE		consensus.independent.component.1184	-0.017469	0.982683	0.0302707	-0.577092	0.563877	0.982683	1.01762	0.926076	1.04275	0.248815	FALSE	FALSE	FALSE	FALSE	FALSE	FALSE	FALSE
consensus.independent.component.1187	-0.0291151	0.971305	0.0437686	-0.665206	0.505919	0.971305	1.02954	0.891455	1.05831	0.295919	FALSE	FALSE	FALSE	FALSE	FALSE	FALSE	FALSE	FALSE	FALSE	FALSE	FALSE	FALSE	FALSE	FALSE	FALSE	FALSE	FALSE	FALSE	FALSE	FALSE		consensus.independent.component.1187	-0.0082289	0.991805	0.0482626	-0.170503	0.864615	0.991805	1.00826	0.902288	1.0902	0.0631773	FALSE	FALSE	FALSE	FALSE	FALSE	FALSE	FALSE
consensus.independent.component.1189	0.0167235	1.01686	0.0376072	0.444688	0.656545	1.01686	0.983416	0.944608	1.09465	0.182736	FALSE	FALSE	FALSE	FALSE	FALSE	FALSE	FALSE	FALSE	FALSE	FALSE	FALSE	FALSE	FALSE	FALSE	FALSE	FALSE	FALSE	FALSE	FALSE	FALSE		consensus.independent.component.1189	0.0378032	1.03853	0.0403325	0.937288	0.348611	1.03853	0.962902	0.959592	1.12395	0.457659	FALSE	FALSE	FALSE	FALSE	FALSE	FALSE	FALSE
consensus.independent.component.1210	-0.0214382	0.97879	0.0295633	-0.725164	0.468351	0.97879	1.02167	0.923688	1.03718	0.329428	FALSE	FALSE	FALSE	FALSE	FALSE	FALSE	FALSE	FALSE	FALSE	FALSE	FALSE	FALSE	FALSE	FALSE	FALSE	FALSE	FALSE	FALSE	FALSE	FALSE		consensus.independent.component.1210	-0.0102711	0.989781	0.0300307	-0.342021	0.732335	0.989781	1.01032	0.933205	1.04979	0.13529	FALSE	FALSE	FALSE	FALSE	FALSE	FALSE	FALSE
consensus.independent.component.1214	0.00558822	1.0056	0.0423186	0.132051	0.894944	1.0056	0.994427	0.925561	1.09257	0.0482042	FALSE	FALSE	FALSE	FALSE	FALSE	FALSE	FALSE	FALSE	FALSE	FALSE	FALSE	FALSE	FALSE	FALSE	FALSE	FALSE	FALSE	FALSE	FALSE	FALSE		consensus.independent.component.1214	0.0185763	1.01875	0.0450689	0.412176	0.68021	1.01875	0.981595	0.93262	1.11283	0.167357	FALSE	FALSE	FALSE	FALSE	FALSE	FALSE	FALSE
consensus.independent.component.1224	0.0471534	1.04828	0.0433815	1.08695	0.277059	1.04828	0.953941	0.962836	1.14131	0.557427	FALSE	FALSE	FALSE	FALSE	FALSE	FALSE	FALSE	FALSE	FALSE	FALSE	FALSE	FALSE	FALSE	FALSE	FALSE	FALSE	FALSE	FALSE	FALSE	FALSE		consensus.independent.component.1224	0.0350024	1.03562	0.0449705	0.778341	0.436368	1.03562	0.965603	0.948249	1.13105	0.360147	FALSE	FALSE	FALSE	FALSE	FALSE	FALSE	FALSE
consensus.independent.component.1225	-0.0207677	0.979447	0.0440494	-0.471463	0.63731	0.979447	1.02098	0.898433	1.06776	0.195649	FALSE	FALSE	FALSE	FALSE	FALSE	FALSE	FALSE	FALSE	FALSE	FALSE	FALSE	FALSE	FALSE	FALSE	FALSE	FALSE	FALSE	FALSE	FALSE	FALSE		consensus.independent.component.1225	-0.00101075	0.99899	0.0486672	-0.0207686	0.98343	0.99899	1.00101	0.908104	1.09897	0.00725643	FALSE	FALSE	FALSE	FALSE	FALSE	FALSE	FALSE
consensus.independent.component.1238	0.0907465	1.09499	0.0388519	2.33571	0.0195066	1.09499	0.913249	1.01471	1.18163	1.70982	TRUE	TRUE	TRUE	TRUE	TRUE	TRUE	TRUE	TRUE	TRUE	TRUE	TRUE	TRUE	TRUE	TRUE	TRUE	TRUE	TRUE	TRUE	TRUE	TRUE		consensus.independent.component.1238	0.0800403	1.08333	0.0415042	1.92849	0.0537947	1.08333	0.923079	0.998694	1.17514	1.26926	FALSE	FALSE	FALSE	FALSE	FALSE	FALSE	FALSE
consensus.independent.component.1257	0.00479214	1.0048	0.0405281	0.118242	0.905876	1.0048	0.995219	0.928076	1.08787	0.0429314	FALSE	FALSE	FALSE	FALSE	FALSE	FALSE	FALSE	FALSE	FALSE	FALSE	FALSE	FALSE	FALSE	FALSE	FALSE	FALSE	FALSE	FALSE	FALSE	FALSE		consensus.independent.component.1257	-0.00837918	0.991656	0.0442623	-0.189307	0.849852	0.991656	1.00841	0.909253	1.08153	0.0706567	FALSE	FALSE	FALSE	FALSE	FALSE	FALSE	FALSE
[truncated: 18 more columns]

## Sheet: TCs <> OS (F2,SF1)
UNIVARIATE OS																																MULTIVARIATE OS
	coef	exp(coef)	se(coef)	z	Pr(>|z|)	exp(coef)	exp(-coef)	lower .95	upper .95	mlogpva	MVP_reject_H0 nPerm= 10000 FDR= 0.01 conf= 0.99	MVP_reject_H0 nPerm= 10000 FDR= 0.01 conf= 0.95	MVP_reject_H0 nPerm= 10000 FDR= 0.01 conf= 0.9	MVP_reject_H0 nPerm= 10000 FDR= 0.01 conf= 0.85	MVP_reject_H0 nPerm= 10000 FDR= 0.01 conf= 0.8	MVP_reject_H0 nPerm= 10000 FDR= 0.05 conf= 0.99	MVP_reject_H0 nPerm= 10000 FDR= 0.05 conf= 0.95	MVP_reject_H0 nPerm= 10000 FDR= 0.05 conf= 0.9	MVP_reject_H0 nPerm= 10000 FDR= 0.05 conf= 0.85	MVP_reject_H0 nPerm= 10000 FDR= 0.05 conf= 0.8	MVP_reject_H0 nPerm= 10000 FDR= 0.1 conf= 0.99	MVP_reject_H0 nPerm= 10000 FDR= 0.1 conf= 0.95	MVP_reject_H0 nPerm= 10000 FDR= 0.1 conf= 0.9	MVP_reject_H0 nPerm= 10000 FDR= 0.1 conf= 0.85	MVP_reject_H0 nPerm= 10000 FDR= 0.1 conf= 0.8	MVP_reject_H0 nPerm= 10000 FDR= 0.2 conf= 0.99	MVP_reject_H0 nPerm= 10000 FDR= 0.2 conf= 0.95	MVP_reject_H0 nPerm= 10000 FDR= 0.2 conf= 0.9					coef	exp(coef)	se(coef)	z	Pr(>|z|)	exp(coef)	exp(-coef)	lower .95	upper .95	mlogpva	MVP_reject_H0 nPerm= 10000 FDR= 0.01 conf= 0.99	MVP_reject_H0 nPerm= 10000 FDR= 0.01 conf= 0.95	MVP_reject_H0 nPerm= 10000 FDR= 0.01 conf= 0.9	MVP_reject_H0 nPerm= 10000 FDR= 0.01 conf= 0.8	MVP_reject_H0 nPerm= 10000 FDR= 0.01 conf= 0.5	MVP_reject_H0 nPerm= 10000 FDR= 0.05 conf= 0.99	MVP_reject_H0 nPerm= 10000 FDR= 0.05 conf= 0.95
consensus.independent.component.3	0.0304452	1.03091	0.0182918	1.66442	0.0960291	1.03091	0.970014	0.994608	1.06854	1.0176	FALSE	FALSE	FALSE	FALSE	FALSE	FALSE	FALSE	FALSE	FALSE	FALSE	FALSE	FALSE	FALSE	FALSE	FALSE	FALSE	FALSE	FALSE				consensus.independent.component.3	0.0341058	1.03469	0.0192504	1.7717	0.0764448	1.03469	0.966469	0.996382	1.07448	1.11665	FALSE	FALSE	FALSE	FALSE	FALSE	FALSE	FALSE
consensus.independent.component.6	0.0317698	1.03228	0.0122352	2.59659	0.00941536	1.03228	0.96873	1.00782	1.05733	2.02616	FALSE	FALSE	FALSE	FALSE	FALSE	FALSE	FALSE	FALSE	FALSE	FALSE	FALSE	FALSE	FALSE	FALSE	FALSE	FALSE	FALSE	FALSE				consensus.independent.component.6	0.0476883	1.04884	0.0132371	3.60263	0.000315016	1.04884	0.953431	1.02198	1.07641	3.50167	TRUE	TRUE	TRUE	TRUE	TRUE	TRUE	TRUE
consensus.independent.component.7	0.0389934	1.03976	0.0187196	2.08303	0.0372489	1.03976	0.961757	1.00231	1.07862	1.42889	FALSE	FALSE	FALSE	FALSE	FALSE	FALSE	FALSE	FALSE	FALSE	FALSE	FALSE	FALSE	FALSE	FALSE	FALSE	FALSE	FALSE	FALSE				consensus.independent.component.7	0.0483958	1.04959	0.0205985	2.34948	0.0187997	1.04959	0.952757	1.00806	1.09283	1.72585	FALSE	FALSE	FALSE	FALSE	FALSE	FALSE	FALSE
consensus.independent.component.8	0.0213888	1.02162	0.0357319	0.598592	0.549445	1.02162	0.978838	0.95252	1.09573	0.260076	FALSE	FALSE	FALSE	FALSE	FALSE	FALSE	FALSE	FALSE	FALSE	FALSE	FALSE	FALSE	FALSE	FALSE	FALSE	FALSE	FALSE	FALSE				consensus.independent.component.8	0.0180935	1.01826	0.0418444	0.4324	0.665451	1.01826	0.982069	0.93808	1.10529	0.176884	FALSE	FALSE	FALSE	FALSE	FALSE	FALSE	FALSE
consensus.independent.component.9	-0.00693591	0.993088	0.0229711	-0.301941	0.762697	0.993088	1.00696	0.949368	1.03882	0.117648	FALSE	FALSE	FALSE	FALSE	FALSE	FALSE	FALSE	FALSE	FALSE	FALSE	FALSE	FALSE	FALSE	FALSE	FALSE	FALSE	FALSE	FALSE				consensus.independent.component.9	0.0318147	1.03233	0.0292104	1.08916	0.276085	1.03233	0.968686	0.974884	1.09315	0.558957	FALSE	FALSE	FALSE	FALSE	FALSE	FALSE	FALSE
consensus.independent.component.11	0.030455	1.03092	0.0119903	2.53997	0.0110864	1.03092	0.970004	1.00698	1.05544	1.95521	FALSE	FALSE	FALSE	FALSE	FALSE	FALSE	FALSE	FALSE	FALSE	FALSE	FALSE	FALSE	FALSE	FALSE	FALSE	FALSE	FALSE	FALSE				consensus.independent.component.11	0.0328795	1.03343	0.0130799	2.51374	0.0119458	1.03343	0.967655	1.00727	1.06026	1.92278	FALSE	FALSE	FALSE	FALSE	FALSE	FALSE	FALSE
consensus.independent.component.15	-0.0403892	0.960416	0.0324201	-1.24581	0.212835	0.960416	1.04122	0.901287	1.02342	0.671957	FALSE	FALSE	FALSE	FALSE	FALSE	FALSE	FALSE	FALSE	FALSE	FALSE	FALSE	FALSE	FALSE	FALSE	FALSE	FALSE	FALSE	FALSE				consensus.independent.component.15	-0.0379685	0.962743	0.0347076	-1.09395	0.273975	0.962743	1.0387	0.89943	1.03051	0.562288	FALSE	FALSE	FALSE	FALSE	FALSE	FALSE	FALSE
consensus.independent.component.19	0.0244047	1.0247	0.0118663	2.05663	0.0397217	1.0247	0.975891	1.00115	1.04882	1.40097	FALSE	FALSE	FALSE	FALSE	FALSE	FALSE	FALSE	FALSE	FALSE	FALSE	FALSE	FALSE	FALSE	FALSE	FALSE	FALSE	FALSE	FALSE				consensus.independent.component.19	0.0361007	1.03676	0.0140863	2.56282	0.0103825	1.03676	0.964543	1.00853	1.06578	1.9837	FALSE	FALSE	FALSE	FALSE	TRUE	FALSE	FALSE
consensus.independent.component.28	0.0989682	1.10403	0.0403922	2.45018	0.0142784	1.10403	0.905771	1.02	1.19499	1.84532	FALSE	FALSE	FALSE	FALSE	FALSE	FALSE	FALSE	FALSE	FALSE	FALSE	FALSE	FALSE	FALSE	FALSE	FALSE	FALSE	FALSE	FALSE				consensus.independent.component.28	0.11438	1.12118	0.0413376	2.76698	0.00565774	1.12118	0.891919	1.03392	1.2158	2.24736	FALSE	FALSE	FALSE	FALSE	TRUE	FALSE	FALSE
consensus.independent.component.51	-0.0132871	0.986801	0.00909255	-1.46131	0.143929	0.986801	1.01338	0.969371	1.00454	0.841851	FALSE	FALSE	FALSE	FALSE	FALSE	FALSE	FALSE	FALSE	FALSE	FALSE	FALSE	FALSE	FALSE	FALSE	FALSE	FALSE	FALSE	FALSE				consensus.independent.component.51	-0.0131979	0.986889	0.0106556	-1.23859	0.215499	0.986889	1.01329	0.966492	1.00772	0.666554	FALSE	FALSE	FALSE	FALSE	FALSE	FALSE	FALSE
consensus.independent.component.59	-0.0159494	0.984177	0.0311052	-0.512756	0.608122	0.984177	1.01608	0.925969	1.04604	0.216009	FALSE	FALSE	FALSE	FALSE	FALSE	FALSE	FALSE	FALSE	FALSE	FALSE	FALSE	FALSE	FALSE	FALSE	FALSE	FALSE	FALSE	FALSE				consensus.independent.component.59	-0.0230655	0.977198	0.0348111	-0.662589	0.507594	0.977198	1.02333	0.912749	1.0462	0.294484	FALSE	FALSE	FALSE	FALSE	FALSE	FALSE	FALSE
consensus.independent.component.73	-0.0441157	0.956843	0.0140349	-3.14328	0.00167064	0.956843	1.0451	0.930881	0.983529	2.77712	FALSE	FALSE	TRUE	TRUE	TRUE	FALSE	FALSE	TRUE	TRUE	TRUE	FALSE	FALSE	TRUE	TRUE	TRUE	FALSE	FALSE	TRUE				consensus.independent.component.73	-0.0481766	0.952965	0.0170374	-2.8277	0.00468844	0.952965	1.04936	0.921669	0.985325	2.32897	FALSE	FALSE	TRUE	TRUE	TRUE	FALSE	FALSE
consensus.independent.component.93	0.0658966	1.06812	0.0518388	1.27118	0.203664	1.06812	0.936228	0.964924	1.18234	0.691087	FALSE	FALSE	FALSE	FALSE	FALSE	FALSE	FALSE	FALSE	FALSE	FALSE	FALSE	FALSE	FALSE	FALSE	FALSE	FALSE	FALSE	FALSE				consensus.independent.component.93	0.0173705	1.01752	0.0572973	0.303164	0.761765	1.01752	0.98278	0.909436	1.13845	0.118179	FALSE	FALSE	FALSE	FALSE	FALSE	FALSE	FALSE
consensus.independent.component.100	-0.0182539	0.981912	0.00907933	-2.01049	0.0443799	0.981912	1.01842	0.964593	0.999541	1.35281	FALSE	FALSE	FALSE	FALSE	FALSE	FALSE	FALSE	FALSE	FALSE	FALSE	FALSE	FALSE	FALSE	FALSE	FALSE	FALSE	FALSE	FALSE				consensus.independent.component.100	-0.0183622	0.981805	0.00908015	-2.02224	0.043152	0.981805	1.01853	0.964487	0.999435	1.365	FALSE	FALSE	FALSE	FALSE	FALSE	FALSE	FALSE
consensus.independent.component.168	-0.0701864	0.93222	0.0461012	-1.52244	0.127898	0.93222	1.07271	0.851681	1.02038	0.893136	FALSE	FALSE	FALSE	FALSE	FALSE	FALSE	FALSE	FALSE	FALSE	FALSE	FALSE	FALSE	FALSE	FALSE	FALSE	FALSE	FALSE	FALSE				consensus.independent.component.168	-0.0197982	0.980397	0.050673	-0.390705	0.696016	0.980397	1.02	0.887705	1.08277	0.157381	FALSE	FALSE	FALSE	FALSE	FALSE	FALSE	FALSE
consensus.independent.component.190	-0.0484021	0.952751	0.0430126	-1.1253	0.260461	0.952751	1.04959	0.875723	1.03655	0.584257	FALSE	FALSE	FALSE	FALSE	FALSE	FALSE	FALSE	FALSE	FALSE	FALSE	FALSE	FALSE	FALSE	FALSE	FALSE	FALSE	FALSE	FALSE				consensus.independent.component.190	-0.058311	0.943356	0.0460157	-1.2672	0.205084	0.943356	1.06004	0.862	1.03239	0.688068	FALSE	FALSE	FALSE	FALSE	FALSE	FALSE	FALSE
consensus.independent.component.299	-0.00124598	0.998755	0.0410077	-0.0303841	0.975761	0.998755	1.00125	0.921622	1.08234	0.0106567	FALSE	FALSE	FALSE	FALSE	FALSE	FALSE	FALSE	FALSE	FALSE	FALSE	FALSE	FALSE	FALSE	FALSE	FALSE	FALSE	FALSE	FALSE				consensus.independent.component.299	-0.000306095	0.999694	0.0437072	-0.00700331	0.994412	0.999694	1.00031	0.917621	1.08911	0.00243355	FALSE	FALSE	FALSE	FALSE	FALSE	FALSE	FALSE
consensus.independent.component.331	0.0211225	1.02135	0.0405008	0.521533	0.601996	1.02135	0.979099	0.943407	1.10573	0.220407	FALSE	FALSE	FALSE	FALSE	FALSE	FALSE	FALSE	FALSE	FALSE	FALSE	FALSE	FALSE	FALSE	FALSE	FALSE	FALSE	FALSE	FALSE				consensus.independent.component.331	-0.00307766	0.996927	0.0433833	-0.070941	0.943445	0.996927	1.00308	0.915663	1.0854	0.0252835	FALSE	FALSE	FALSE	FALSE	FALSE	FALSE	FALSE
consensus.independent.component.341	-0.0686352	0.933667	0.0449035	-1.52851	0.126387	0.933667	1.07105	0.855008	1.01956	0.898297	FALSE	FALSE	FALSE	FALSE	FALSE	FALSE	FALSE	FALSE	FALSE	FALSE	FALSE	FALSE	FALSE	FALSE	FALSE	FALSE	FALSE	FALSE				consensus.independent.component.341	-0.0622805	0.939619	0.0484307	-1.28597	0.198453	0.939619	1.06426	0.854531	1.03318	0.702342	FALSE	FALSE	FALSE	FALSE	FALSE	FALSE	FALSE
consensus.independent.component.351	-0.0312035	0.969278	0.026335	-1.18487	0.236069	0.969278	1.0317	0.920518	1.02062	0.626961	FALSE	FALSE	FALSE	FALSE	FALSE	FALSE	FALSE	FALSE	FALSE	FALSE	FALSE	FALSE	FALSE	FALSE	FALSE	FALSE	FALSE	FALSE				consensus.independent.component.351	-0.00591972	0.994098	0.0312396	-0.189494	0.849706	0.994098	1.00594	0.935057	1.05687	0.0707315	FALSE	FALSE	FALSE	FALSE	FALSE	FALSE	FALSE
consensus.independent.component.388	0.0143434	1.01445	0.0294965	0.486275	0.626773	1.01445	0.985759	0.957463	1.07482	0.20289	FALSE	FALSE	FALSE	FALSE	FALSE	FALSE	FALSE	FALSE	FALSE	FALSE	FALSE	FALSE	FALSE	FALSE	FALSE	FALSE	FALSE	FALSE				consensus.independent.component.388	-0.00810945	0.991923	0.0318523	-0.254596	0.799036	0.991923	1.00814	0.931892	1.05582	0.0974339	FALSE	FALSE	FALSE	FALSE	FALSE	FALSE	FALSE
consensus.independent.component.398	-0.00654092	0.99348	0.0112157	-0.583191	0.559765	0.99348	1.00656	0.97188	1.01556	0.251995	FALSE	FALSE	FALSE	FALSE	FALSE	FALSE	FALSE	FALSE	FALSE	FALSE	FALSE	FALSE	FALSE	FALSE	FALSE	FALSE	FALSE	FALSE				consensus.independent.component.398	0.00291974	1.00292	0.0128261	0.22764	0.819926	1.00292	0.997085	0.978026	1.02846	0.0862253	FALSE	FALSE	FALSE	FALSE	FALSE	FALSE	FALSE
consensus.independent.component.499	-0.00400812	0.996	0.0345754	-0.115924	0.907713	0.996	1.00402	0.930741	1.06583	0.0420516	FALSE	FALSE	FALSE	FALSE	FALSE	FALSE	FALSE	FALSE	FALSE	FALSE	FALSE	FALSE	FALSE	FALSE	FALSE	FALSE	FALSE	FALSE				consensus.independent.component.499	0.056518	1.05815	0.0452325	1.2495	0.211483	1.05815	0.945049	0.968375	1.15624	0.674725	FALSE	FALSE	FALSE	FALSE	FALSE	FALSE	FALSE
consensus.independent.component.525	0.0342554	1.03485	0.0102672	3.33638	0.000848772	1.03485	0.966325	1.01423	1.05588	3.07121	TRUE	TRUE	TRUE	TRUE	TRUE	TRUE	TRUE	TRUE	TRUE	TRUE	TRUE	TRUE	TRUE	TRUE	TRUE	TRUE	TRUE	TRUE				consensus.independent.component.525	0.0263615	1.02671	0.010495	2.51182	0.0120109	1.02671	0.973983	1.00581	1.04805	1.92043	FALSE	FALSE	FALSE	FALSE	FALSE	FALSE	FALSE
consensus.independent.component.551	-0.00119825	0.998802	0.0442341	-0.0270888	0.978389	0.998802	1.0012	0.915857	1.08926	0.00948849	FALSE	FALSE	FALSE	FALSE	FALSE	FALSE	FALSE	FALSE	FALSE	FALSE	FALSE	FALSE	FALSE	FALSE	FALSE	FALSE	FALSE	FALSE				consensus.independent.component.551	0.0219047	1.02215	0.0500139	0.437972	0.661407	1.02215	0.978334	0.926704	1.12742	0.179531	FALSE	FALSE	FALSE	FALSE	FALSE	FALSE	FALSE
consensus.independent.component.671	0.0144893	1.01459	0.0364384	0.397639	0.690896	1.01459	0.985615	0.944661	1.08971	0.160587	FALSE	FALSE	FALSE	FALSE	FALSE	FALSE	FALSE	FALSE	FALSE	FALSE	FALSE	FALSE	FALSE	FALSE	FALSE	FALSE	FALSE	FALSE				consensus.independent.component.671	0.042426	1.04334	0.0381262	1.11278	0.265804	1.04334	0.958461	0.968216	1.12429	0.575438	FALSE	FALSE	FALSE	FALSE	FALSE	FALSE	FALSE
consensus.independent.component.733	0.0651179	1.06728	0.0475074	1.37069	0.170471	1.06728	0.936957	0.972393	1.17144	0.768348	FALSE	FALSE	FALSE	FALSE	FALSE	FALSE	FALSE	FALSE	FALSE	FALSE	FALSE	FALSE	FALSE	FALSE	FALSE	FALSE	FALSE	FALSE				consensus.independent.component.733	0.0918671	1.09622	0.0518187	1.77286	0.0762527	1.09622	0.912226	0.990351	1.2134	1.11774	FALSE	FALSE	FALSE	FALSE	FALSE	FALSE	FALSE
consensus.independent.component.734	0.00410996	1.00412	0.0420224	0.097804	0.922088	1.00412	0.995898	0.924731	1.09032	0.0352277	FALSE	FALSE	FALSE	FALSE	FALSE	FALSE	FALSE	FALSE	FALSE	FALSE	FALSE	FALSE	FALSE	FALSE	FALSE	FALSE	FALSE	FALSE				consensus.independent.component.734	0.0209573	1.02118	0.0467754	0.448041	0.654124	1.02118	0.979261	0.931722	1.11922	0.18434	FALSE	FALSE	FALSE	FALSE	FALSE	FALSE	FALSE
consensus.independent.component.757	0.0199671	1.02017	0.034597	0.577132	0.56385	1.02017	0.980231	0.953285	1.09174	0.248836	FALSE	FALSE	FALSE	FALSE	FALSE	FALSE	FALSE	FALSE	FALSE	FALSE	FALSE	FALSE	FALSE	FALSE	FALSE	FALSE	FALSE	FALSE				consensus.independent.component.757	0.0108747	1.01093	0.0372149	0.292215	0.770122	1.01093	0.989184	0.939822	1.08743	0.11344	FALSE	FALSE	FALSE	FALSE	FALSE	FALSE	FALSE
consensus.independent.component.785	-0.0124337	0.987643	0.0525679	-0.236527	0.813024	0.987643	1.01251	0.890952	1.09483	0.0898966	FALSE	FALSE	FALSE	FALSE	FALSE	FALSE	FALSE	FALSE	FALSE	FALSE	FALSE	FALSE	FALSE	FALSE	FALSE	FALSE	FALSE	FALSE				consensus.independent.component.785	-0.021274	0.978951	0.062025	-0.34299	0.731606	0.978951	1.0215	0.866892	1.10549	0.135723	FALSE	FALSE	FALSE	FALSE	FALSE	FALSE	FALSE
consensus.independent.component.792	0.0304265	1.03089	0.015549	1.95681	0.0503703	1.03089	0.970032	0.999951	1.06279	1.29783	FALSE	FALSE	FALSE	FALSE	FALSE	FALSE	FALSE	FALSE	FALSE	FALSE	FALSE	FALSE	FALSE	FALSE	FALSE	FALSE	FALSE	FALSE				consensus.independent.component.792	0.0398719	1.04068	0.0164886	2.41815	0.0155995	1.04068	0.960912	1.00758	1.07486	1.80689	FALSE	FALSE	FALSE	FALSE	FALSE	FALSE	FALSE
consensus.independent.component.793	0.0379571	1.03869	0.0166785	2.27582	0.0228568	1.03869	0.962754	1.00528	1.0732	1.64098	FALSE	FALSE	FALSE	FALSE	FALSE	FALSE	FALSE	FALSE	FALSE	FALSE	FALSE	FALSE	FALSE	FALSE	FALSE	FALSE	FALSE	FALSE				consensus.independent.component.793	0.0711274	1.07372	0.0204631	3.47589	0.000509169	1.07372	0.931343	1.03151	1.11766	3.29314	FALSE	TRUE	TRUE	TRUE	TRUE	FALSE	TRUE
consensus.independent.component.807	-0.0011997	0.998801	0.0338608	-0.0354302	0.971737	0.998801	1.0012	0.934666	1.06734	0.0124514	FALSE	FALSE	FALSE	FALSE	FALSE	FALSE	FALSE	FALSE	FALSE	FALSE	FALSE	FALSE	FALSE	FALSE	FALSE	FALSE	FALSE	FALSE				consensus.independent.component.807	0.0582033	1.05993	0.0459721	1.26606	0.205493	1.05993	0.943458	0.968603	1.15987	0.687204	FALSE	FALSE	FALSE	FALSE	FALSE	FALSE	FALSE
consensus.independent.component.822	-0.0201637	0.980038	0.04405	-0.457747	0.647134	0.980038	1.02037	0.898975	1.06841	0.189006	FALSE	FALSE	FALSE	FALSE	FALSE	FALSE	FALSE	FALSE	FALSE	FALSE	FALSE	FALSE	FALSE	FALSE	FALSE	FALSE	FALSE	FALSE				consensus.independent.component.822	-0.0277571	0.972625	0.0484071	-0.573409	0.566368	0.972625	1.02815	0.884588	1.06942	0.246901	FALSE	FALSE	FALSE	FALSE	FALSE	FALSE	FALSE
consensus.independent.component.849	0.0416721	1.04255	0.012544	3.32208	0.000893482	1.04255	0.959184	1.01723	1.0685	3.04891	FALSE	FALSE	TRUE	TRUE	TRUE	FALSE	FALSE	TRUE	TRUE	TRUE	FALSE	FALSE	TRUE	TRUE	TRUE	FALSE	FALSE	TRUE				consensus.independent.component.849	0.0309076	1.03139	0.0145772	2.12027	0.0339832	1.03139	0.969565	1.00234	1.06128	1.46874	FALSE	FALSE	FALSE	FALSE	FALSE	FALSE	FALSE
consensus.independent.component.865	0.0310037	1.03149	0.0433393	0.715371	0.47438	1.03149	0.969472	0.947489	1.12294	0.323874	FALSE	FALSE	FALSE	FALSE	FALSE	FALSE	FALSE	FALSE	FALSE	FALSE	FALSE	FALSE	FALSE	FALSE	FALSE	FALSE	FALSE	FALSE				consensus.independent.component.865	0.0779958	1.08112	0.0461277	1.69086	0.0908626	1.08112	0.924968	0.987664	1.18342	1.04161	FALSE	FALSE	FALSE	FALSE	FALSE	FALSE	FALSE
consensus.independent.component.882	-0.0224891	0.977762	0.0460053	-0.488837	0.624957	0.977762	1.02274	0.893456	1.07002	0.20415	FALSE	FALSE	FALSE	FALSE	FALSE	FALSE	FALSE	FALSE	FALSE	FALSE	FALSE	FALSE	FALSE	FALSE	FALSE	FALSE	FALSE	FALSE				consensus.independent.component.882	-0.014194	0.985906	0.0496851	-0.285679	0.775124	0.985906	1.0143	0.894424	1.08675	0.110629	FALSE	FALSE	FALSE	FALSE	FALSE	FALSE	FALSE
consensus.independent.component.888	-0.0407912	0.96003	0.0436641	-0.934204	0.350199	0.96003	1.04163	0.881288	1.04581	0.455685	FALSE	FALSE	FALSE	FALSE	FALSE	FALSE	FALSE	FALSE	FALSE	FALSE	FALSE	FALSE	FALSE	FALSE	FALSE	FALSE	FALSE	FALSE				consensus.independent.component.888	-0.0187643	0.981411	0.0471439	-0.398021	0.690615	0.981411	1.01894	0.894791	1.07642	0.160764	FALSE	FALSE	FALSE	FALSE	FALSE	FALSE	FALSE
consensus.independent.component.918	-0.00059517	0.999405	0.0364528	-0.0163272	0.986973	0.999405	1.0006	0.930492	1.07342	0.00569456	FALSE	FALSE	FALSE	FALSE	FALSE	FALSE	FALSE	FALSE	FALSE	FALSE	FALSE	FALSE	FALSE	FALSE	FALSE	FALSE	FALSE	FALSE				consensus.independent.component.918	0.0224407	1.02269	0.0391828	0.572717	0.566836	1.02269	0.977809	0.947095	1.10433	0.246542	FALSE	FALSE	FALSE	FALSE	FALSE	FALSE	FALSE
consensus.independent.component.920	0.0178126	1.01797	0.036859	0.483263	0.628909	1.01797	0.982345	0.947025	1.09423	0.201412	FALSE	FALSE	FALSE	FALSE	FALSE	FALSE	FALSE	FALSE	FALSE	FALSE	FALSE	FALSE	FALSE	FALSE	FALSE	FALSE	FALSE	FALSE				consensus.independent.component.920	0.049185	1.05041	0.0380928	1.29119	0.196639	1.05041	0.952005	0.974846	1.13184	0.706331	FALSE	FALSE	FALSE	FALSE	FALSE	FALSE	FALSE
consensus.independent.component.921	-0.045554	0.955468	0.0419333	-1.08634	0.277327	0.955468	1.04661	0.880081	1.03731	0.557008	FALSE	FALSE	FALSE	FALSE	FALSE	FALSE	FALSE	FALSE	FALSE	FALSE	FALSE	FALSE	FALSE	FALSE	FALSE	FALSE	FALSE	FALSE				consensus.independent.component.921	-0.0131079	0.986978	0.0453424	-0.289087	0.772515	0.986978	1.01319	0.90305	1.07871	0.112093	FALSE	FALSE	FALSE	FALSE	FALSE	FALSE	FALSE
consensus.independent.component.943	0.0062443	1.00626	0.0367228	0.170039	0.86498	1.00626	0.993775	0.936383	1.08136	0.0629941	FALSE	FALSE	FALSE	FALSE	FALSE	FALSE	FALSE	FALSE	FALSE	FALSE	FALSE	FALSE	FALSE	FALSE	FALSE	FALSE	FALSE	FALSE				consensus.independent.component.943	-0.00840467	0.991631	0.0389125	-0.215989	0.828996	0.991631	1.00844	0.918814	1.07022	0.0814473	FALSE	FALSE	FALSE	FALSE	FALSE	FALSE	FALSE
consensus.independent.component.944	-0.005399	0.994616	0.0449057	-0.12023	0.904301	0.994616	1.00541	0.910818	1.08612	0.043687	FALSE	FALSE	FALSE	FALSE	FALSE	FALSE	FALSE	FALSE	FALSE	FALSE	FALSE	FALSE	FALSE	FALSE	FALSE	FALSE	FALSE	FALSE				consensus.independent.component.944	0.00348447	1.00349	0.0481564	0.0723572	0.942318	1.00349	0.996522	0.913109	1.10282	0.0258027	FALSE	FALSE	FALSE	FALSE	FALSE	FALSE	FALSE
consensus.independent.component.959	-0.0237764	0.976504	0.0477221	-0.498226	0.618325	0.976504	1.02406	0.88931	1.07225	0.208783	FALSE	FALSE	FALSE	FALSE	FALSE	FALSE	FALSE	FALSE	FALSE	FALSE	FALSE	FALSE	FALSE	FALSE	FALSE	FALSE	FALSE	FALSE				consensus.independent.component.959	-0.0393333	0.96143	0.0520125	-0.756229	0.449512	0.96143	1.04012	0.86825	1.06461	0.347259	FALSE	FALSE	FALSE	FALSE	FALSE	FALSE	FALSE
consensus.independent.component.976	0.00513108	1.00514	0.045014	0.113989	0.909247	1.00514	0.994882	0.920264	1.09785	0.0413182	FALSE	FALSE	FALSE	FALSE	FALSE	FALSE	FALSE	FALSE	FALSE	FALSE	FALSE	FALSE	FALSE	FALSE	FALSE	FALSE	FALSE	FALSE				consensus.independent.component.976	0.0189592	1.01914	0.051031	0.371523	0.710248	1.01914	0.981219	0.922139	1.12635	0.14859	FALSE	FALSE	FALSE	FALSE	FALSE	FALSE	FALSE
consensus.independent.component.977	0.0184227	1.01859	0.0479763	0.383996	0.700981	1.01859	0.981746	0.927179	1.11902	0.154293	FALSE	FALSE	FALSE	FALSE	FALSE	FALSE	FALSE	FALSE	FALSE	FALSE	FALSE	FALSE	FALSE	FALSE	FALSE	FALSE	FALSE	FALSE				consensus.independent.component.977	0.0164601	1.0166	0.0510722	0.322291	0.747232	1.0166	0.983675	0.919763	1.12362	0.126544	FALSE	FALSE	FALSE	FALSE	FALSE	FALSE	FALSE
consensus.independent.component.1041	0.0469425	1.04806	0.0420834	1.11546	0.264651	1.04806	0.954142	0.965085	1.13817	0.577326	FALSE	FALSE	FALSE	FALSE	FALSE	FALSE	FALSE	FALSE	FALSE	FALSE	FALSE	FALSE	FALSE	FALSE	FALSE	FALSE	FALSE	FALSE				consensus.independent.component.1041	0.0605346	1.0624	0.0431784	1.40196	0.160926	1.0624	0.941261	0.976194	1.15623	0.793373	FALSE	FALSE	FALSE	FALSE	FALSE	FALSE	FALSE
consensus.independent.component.1052	-0.0319597	0.968546	0.0429442	-0.744216	0.456746	0.968546	1.03248	0.890361	1.0536	0.340325	FALSE	FALSE	FALSE	FALSE	FALSE	FALSE	FALSE	FALSE	FALSE	FALSE	FALSE	FALSE	FALSE	FALSE	FALSE	FALSE	FALSE	FALSE				consensus.independent.component.1052	-0.0496125	0.951598	0.0464537	-1.068	0.285521	0.951598	1.05086	0.868785	1.04231	0.544362	FALSE	FALSE	FALSE	FALSE	FALSE	FALSE	FALSE
consensus.independent.component.1057	-0.020547	0.979663	0.0374515	-0.548631	0.583259	0.979663	1.02076	0.910328	1.05428	0.234139	FALSE	FALSE	FALSE	FALSE	FALSE	FALSE	FALSE	FALSE	FALSE	FALSE	FALSE	FALSE	FALSE	FALSE	FALSE	FALSE	FALSE	FALSE				consensus.independent.component.1057	0.00176072	1.00176	0.0402036	0.0437951	0.965068	1.00176	0.998241	0.925856	1.08389	0.0154422	FALSE	FALSE	FALSE	FALSE	FALSE	FALSE	FALSE
consensus.independent.component.1093	0.0554147	1.05698	0.0293194	1.89003	0.0587534	1.05698	0.946093	0.997952	1.1195	1.23097	FALSE	FALSE	FALSE	FALSE	FALSE	FALSE	FALSE	FALSE	FALSE	FALSE	FALSE	FALSE	FALSE	FALSE	FALSE	FALSE	FALSE	FALSE				consensus.independent.component.1093	0.0726542	1.07536	0.0304732	2.3842	0.0171165	1.07536	0.929922	1.01301	1.14154	1.76658	FALSE	FALSE	FALSE	FALSE	FALSE	FALSE	FALSE
consensus.independent.component.1099	-0.0533051	0.948091	0.0415198	-1.28385	0.199196	0.948091	1.05475	0.873993	1.02847	0.700719	FALSE	FALSE	FALSE	FALSE	FALSE	FALSE	FALSE	FALSE	FALSE	FALSE	FALSE	FALSE	FALSE	FALSE	FALSE	FALSE	FALSE	FALSE				consensus.independent.component.1099	-0.0424353	0.958452	0.045752	-0.927507	0.353664	0.958452	1.04335	0.876247	1.04837	0.45141	FALSE	FALSE	FALSE	FALSE	FALSE	FALSE	FALSE
consensus.independent.component.1109	0.0262331	1.02658	0.0148485	1.76671	0.077277	1.02658	0.974108	0.997135	1.0569	1.11195	FALSE	FALSE	FALSE	FALSE	FALSE	FALSE	FALSE	FALSE	FALSE	FALSE	FALSE	FALSE	FALSE	FALSE	FALSE	FALSE	FALSE	FALSE				consensus.independent.component.1109	0.0254763	1.0258	0.0167156	1.52411	0.127482	1.0258	0.974846	0.992741	1.05997	0.89455	FALSE	FALSE	FALSE	FALSE	FALSE	FALSE	FALSE
consensus.independent.component.1125	-0.0526452	0.948717	0.0371891	-1.41561	0.15689	0.948717	1.05406	0.882025	1.02045	0.804406	FALSE	FALSE	FALSE	FALSE	FALSE	FALSE	FALSE	FALSE	FALSE	FALSE	FALSE	FALSE	FALSE	FALSE	FALSE	FALSE	FALSE	FALSE				consensus.independent.component.1125	-0.0783094	0.924678	0.0390303	-2.00637	0.0448163	0.924678	1.08146	0.85658	0.99819	1.34856	FALSE	FALSE	FALSE	FALSE	FALSE	FALSE	FALSE
consensus.independent.component.1127	0.0451489	1.04618	0.0448455	1.00676	0.314048	1.04618	0.955855	0.958154	1.1423	0.503004	FALSE	FALSE	FALSE	FALSE	FALSE	FALSE	FALSE	FALSE	FALSE	FALSE	FALSE	FALSE	FALSE	FALSE	FALSE	FALSE	FALSE	FALSE				consensus.independent.component.1127	0.0702404	1.07277	0.0503601	1.39476	0.163087	1.07277	0.93217	0.971938	1.18405	0.78758	FALSE	FALSE	FALSE	FALSE	FALSE	FALSE	FALSE
consensus.independent.component.1148	0.0718884	1.07454	0.0475199	1.51281	0.130329	1.07454	0.930635	0.978975	1.17942	0.884959	FALSE	FALSE	FALSE	FALSE	FALSE	FALSE	FALSE	FALSE	FALSE	FALSE	FALSE	FALSE	FALSE	FALSE	FALSE	FALSE	FALSE	FALSE				consensus.independent.component.1148	0.0707602	1.07332	0.0508218	1.39232	0.163826	1.07332	0.931685	0.971563	1.18574	0.785617	FALSE	FALSE	FALSE	FALSE	FALSE	FALSE	FALSE
consensus.independent.component.1151	0.0590743	1.06085	0.027571	2.14262	0.0321435	1.06085	0.942637	1.00505	1.11976	1.49291	FALSE	FALSE	FALSE	FALSE	FALSE	FALSE	FALSE	FALSE	FALSE	FALSE	FALSE	FALSE	FALSE	FALSE	FALSE	FALSE	FALSE	FALSE				consensus.independent.component.1151	0.059805	1.06163	0.0295765	2.02205	0.0431716	1.06163	0.941948	1.00184	1.12499	1.3648	FALSE	FALSE	FALSE	FALSE	FALSE	FALSE	FALSE
consensus.independent.component.1154	-0.000383878	0.999616	0.0375022	-0.0102362	0.991833	0.999616	1.00038	0.928777	1.07586	0.00356151	FALSE	FALSE	FALSE	FALSE	FALSE	FALSE	FALSE	FALSE	FALSE	FALSE	FALSE	FALSE	FALSE	FALSE	FALSE	FALSE	FALSE	FALSE				consensus.independent.component.1154	0.0299264	1.03038	0.0396817	0.75416	0.450753	1.03038	0.970517	0.953278	1.11371	0.346061	FALSE	FALSE	FALSE	FALSE	FALSE	FALSE	FALSE
consensus.independent.component.1166	0.0222548	1.0225	0.0313161	0.710652	0.4773	1.0225	0.977991	0.961632	1.08723	0.321209	FALSE	FALSE	FALSE	FALSE	FALSE	FALSE	FALSE	FALSE	FALSE	FALSE	FALSE	FALSE	FALSE	FALSE	FALSE	FALSE	FALSE	FALSE				consensus.independent.component.1166	0.0105866	1.01064	0.0326244	0.324498	0.745561	1.01064	0.989469	0.948042	1.07738	0.127517	FALSE	FALSE	FALSE	FALSE	FALSE	FALSE	FALSE
consensus.independent.component.1170	-0.0379723	0.96274	0.0456258	-0.832256	0.405264	0.96274	1.0387	0.880384	1.0528	0.392261	FALSE	FALSE	FALSE	FALSE	FALSE	FALSE	FALSE	FALSE	FALSE	FALSE	FALSE	FALSE	FALSE	FALSE	FALSE	FALSE	FALSE	FALSE				consensus.independent.component.1170	-0.0453657	0.955648	0.0537422	-0.844135	0.398594	0.955648	1.04641	0.860107	1.0618	0.399469	FALSE	FALSE	FALSE	FALSE	FALSE	FALSE	FALSE
consensus.independent.component.1174	-0.0276313	0.972747	0.0484504	-0.5703	0.568474	0.972747	1.02802	0.884624	1.06965	0.245289	FALSE	FALSE	FALSE	FALSE	FALSE	FALSE	FALSE	FALSE	FALSE	FALSE	FALSE	FALSE	FALSE	FALSE	FALSE	FALSE	FALSE	FALSE				consensus.independent.component.1174	-0.0424772	0.958412	0.0501184	-0.847538	0.396695	0.958412	1.04339	0.868743	1.05734	0.401543	FALSE	FALSE	FALSE	FALSE	FALSE	FALSE	FALSE
consensus.independent.component.1175	0.0576897	1.05939	0.0328631	1.75545	0.079182	1.05939	0.943943	0.993302	1.12987	1.10137	FALSE	FALSE	FALSE	FALSE	FALSE	FALSE	FALSE	FALSE	FALSE	FALSE	FALSE	FALSE	FALSE	FALSE	FALSE	FALSE	FALSE	FALSE				consensus.independent.component.1175	0.0988657	1.10392	0.0358545	2.75741	0.00582605	1.10392	0.905864	1.029	1.18428	2.23463	FALSE	FALSE	FALSE	FALSE	TRUE	FALSE	FALSE
consensus.independent.component.1184	-0.0211035	0.979118	0.0324788	-0.649762	0.515846	0.979118	1.02133	0.918732	1.04347	0.28748	FALSE	FALSE	FALSE	FALSE	FALSE	FALSE	FALSE	FALSE	FALSE	FALSE	FALSE	FALSE	FALSE	FALSE	FALSE	FALSE	FALSE	FALSE				consensus.independent.component.1184	-0.0448783	0.956114	0.034231	-1.31104	0.189844	0.956114	1.0459	0.894071	1.02246	0.721604	FALSE	FALSE	FALSE	FALSE	FALSE	FALSE	FALSE
consensus.independent.component.1187	-0.0587231	0.942968	0.0491145	-1.19564	0.231839	0.942968	1.06048	0.856427	1.03825	0.634814	FALSE	FALSE	FALSE	FALSE	FALSE	FALSE	FALSE	FALSE	FALSE	FALSE	FALSE	FALSE	FALSE	FALSE	FALSE	FALSE	FALSE	FALSE				consensus.independent.component.1187	-0.0587	0.94299	0.0554867	-1.05791	0.290096	0.94299	1.06046	0.845817	1.05133	0.537458	FALSE	FALSE	FALSE	FALSE	FALSE	FALSE	FALSE
consensus.independent.component.1189	0.043946	1.04493	0.0424954	1.03414	0.301072	1.04493	0.957006	0.961421	1.13568	0.521329	FALSE	FALSE	FALSE	FALSE	FALSE	FALSE	FALSE	FALSE	FALSE	FALSE	FALSE	FALSE	FALSE	FALSE	FALSE	FALSE	FALSE	FALSE				consensus.independent.component.1189	0.0523905	1.05379	0.0454413	1.15293	0.24894	1.05379	0.948958	0.963992	1.15195	0.603906	FALSE	FALSE	FALSE	FALSE	FALSE	FALSE	FALSE
consensus.independent.component.1210	-0.0196461	0.980546	0.032385	-0.606643	0.544088	0.980546	1.01984	0.920241	1.0448	0.264331	FALSE	FALSE	FALSE	FALSE	FALSE	FALSE	FALSE	FALSE	FALSE	FALSE	FALSE	FALSE	FALSE	FALSE	FALSE	FALSE	FALSE	FALSE				consensus.independent.component.1210	-0.00887701	0.991162	0.0340571	-0.260651	0.794362	0.991162	1.00892	0.927161	1.05958	0.0999815	FALSE	FALSE	FALSE	FALSE	FALSE	FALSE	FALSE
consensus.independent.component.1214	-0.0446619	0.956321	0.0473136	-0.943954	0.345193	0.956321	1.04567	0.871626	1.04925	0.461938	FALSE	FALSE	FALSE	FALSE	FALSE	FALSE	FALSE	FALSE	FALSE	FALSE	FALSE	FALSE	FALSE	FALSE	FALSE	FALSE	FALSE	FALSE				consensus.independent.component.1214	-0.0424762	0.958413	0.0501193	-0.847502	0.396715	0.958413	1.04339	0.868743	1.05734	0.401521	FALSE	FALSE	FALSE	FALSE	FALSE	FALSE	FALSE
consensus.independent.component.1224	0.0385622	1.03932	0.0476865	0.80866	0.418711	1.03932	0.962172	0.946578	1.14114	0.378086	FALSE	FALSE	FALSE	FALSE	FALSE	FALSE	FALSE	FALSE	FALSE	FALSE	FALSE	FALSE	FALSE	FALSE	FALSE	FALSE	FALSE	FALSE				consensus.independent.component.1224	0.0337888	1.03437	0.0501017	0.674404	0.500054	1.03437	0.966776	0.937622	1.14109	0.300983	FALSE	FALSE	FALSE	FALSE	FALSE	FALSE	FALSE
consensus.independent.component.1225	-0.0323114	0.968205	0.05025	-0.643012	0.520217	0.968205	1.03284	0.877394	1.06842	0.283816	FALSE	FALSE	FALSE	FALSE	FALSE	FALSE	FALSE	FALSE	FALSE	FALSE	FALSE	FALSE	FALSE	FALSE	FALSE	FALSE	FALSE	FALSE				consensus.independent.component.1225	-0.00691141	0.993112	0.0536636	-0.128791	0.897523	0.993112	1.00694	0.893964	1.10326	0.0469546	FALSE	FALSE	FALSE	FALSE	FALSE	FALSE	FALSE
consensus.independent.component.1238	0.126111	1.13441	0.0434259	2.90406	0.00368363	1.13441	0.881517	1.04185	1.23519	2.43372	FALSE	FALSE	TRUE	TRUE	TRUE	FALSE	FALSE	TRUE	TRUE	TRUE	FALSE	FALSE	TRUE	TRUE	TRUE	FALSE	FALSE	TRUE				consensus.independent.component.1238	0.110867	1.11725	0.0468242	2.36772	0.0178979	1.11725	0.895058	1.01928	1.22463	1.7472	FALSE	FALSE	FALSE	FALSE	FALSE	FALSE	FALSE
consensus.independent.component.1257	0.00931616	1.00936	0.0447734	0.208074	0.835171	1.00936	0.990727	0.924559	1.10194	0.0782244	FALSE	FALSE	FALSE	FALSE	FALSE	FALSE	FALSE	FALSE	FALSE	FALSE	FALSE	FALSE	FALSE	FALSE	FALSE	FALSE	FALSE	FALSE				consensus.independent.component.1257	-0.0287894	0.971621	0.0491746	-0.585452	0.558244	0.971621	1.02921	0.882347	1.06993	0.253176	FALSE	FALSE	FALSE	FALSE	FALSE	FALSE	FALSE
[truncated: 18 more columns]

## Sheet: TCs <> CPs (SF2)
p-value ssociation TCs <> sex			p-value ssociation TCs <> primary diagnosis			p-value ssociation TCs <> age
TC6	0.464719		TC6	0.111261		TC6	0.281031
TC7	0.79638		TC7	0.523472		TC7	0.414179
TC11	0.516087		TC11	0.300215		TC11	0.390009
TC19	0.861729		TC19	0.0471569		TC19	0.870564
TC28	0.267193		TC28	0.104076		TC28	0.470854
TC73	0.00219853		TC73	0.000549252		TC73	0.0614679
TC671	0.750301		TC671	0.0194582		TC671	0.523898
TC100	0.509164		TC100	0.593175		TC100	0.293498
TC525	0.368748		TC525	0.00120145		TC525	0.186313
TC792	0.880354		TC792	0.0510974		TC792	0.80952
TC793	0.0190875		TC793	0.00024385		TC793	0.981904
TC849	0.0362259		TC849	0.00221099		TC849	0.145174
TC865	0.513313		TC865	0.245514		TC865	0.516661
TC1093	0.456876		TC1093	0.77584		TC1093	0.188298
TC1125	0.617873		TC1125	0.404958		TC1125	0.450018
TC1151	0.000435016		TC1151	0.211359		TC1151	0.420357
TC1175	0.836457		TC1175	0.7068		TC1175	0.470822
TC1238	0.54712		TC1238	0.0529921		TC1238	0.635498

## Sheet: Hallmark <> TCs (F2,SF1)
PATHWAYS	TC3	TC6	TC7	TC8	TC9	TC11	TC15	TC19	TC28	TC51	TC59	TC73	TC93	TC100	TC168	TC190	TC299	TC331	TC341	TC351	TC388	TC398	TC499	TC525	TC551	TC671	TC733	TC734	TC757	TC785	TC792	TC793	TC807	TC822	TC849	TC865	TC882	TC888	TC918	TC920	TC921	TC943	TC944	TC959	TC976	TC977	TC1041	TC1052	TC1057
ESTROGEN_RESPONSE_LATE	3.73611	1.97806	-1.57e-06	-0.0001459	0	0.674616	0.0135593	1.35597	-0.0135561	-0.0001471	1.91222	0.764887	-1.56e-06	2.53961	-1.56e-06	0	-0.0001458	-0.0001458	1.63015	3.53927	0	-2.30129	-0.0135585	0.53309	-0.0135545	0	0.0135561	-0.0135545	0.0135545	-0.0135545	1.50968	2.36124	0.0001458	0.0135545	4.40556	-0.0135545	0.0001458	0.0135545	-0.0135553	0.0135545	0	0.0135545	0.0135545	-0.0135553	-0.0001458	0	0	-0.0135553	0.0135545
G2M_CHECKPOINT	18.1808	0.717609	0.446984	-0.000169	1.04429	0.636594	0.0145911	3.13604	-0.0145876	0.288541	1.39146e-16	1.08827	-1.95e-06	0.633189	-1.95e-06	0	-0.000169	-0.0001689	-0.0001691	0.826263	2.78292e-16	-0.0001705	-0.0145902	-2.54e-10	-0.0145859	0	0.0145876	-0.0145859	0.0145859	-0.0145859	-2.57e-10	1.81473	0.00016889	0.0145859	-0.729349	-0.0145859	0.00016889	0.0145859	-0.0145868	0.0145859	0	0.0145859	0.0145859	-0.0145868	-0.0001689	0	0	-0.0145868	0.0145859
MYC_TARGETS_V1	4.3741	1.07611	0.826437	-0.0001724	0	1.32511	0.0147385	1.87348	-0.014735	5.70752	1.39146e-16	1.08536	-2.01e-06	1.55992	-2.01e-06	0	-0.0001724	-0.0001724	-0.0001725	0.825926	1.39146e-16	1.09803	-0.0147376	0.760862	-0.0147333	0	0.014735	-0.0147333	2.51941	-0.0147333	-2.7e-10	0.295082	0.00017233	0.0147333	1.55133	-0.0147333	0.00017233	0.0147333	-0.0147341	0.0147333	0	0.0147333	0.0147333	-0.0147341	-0.0001724	0	0	-0.0147341	0.0147333
E2F_TARGETS	17.691	0.348112	0.826437	-0.0001724	0	1.32511	0.0147385	1.05662	-0.014735	1.50857	1.39146e-16	1.08536	-2.01e-06	1.55992	-2.01e-06	0	-0.0001724	-0.0001724	-0.0001725	0.825926	1.39146e-16	-0.000174	-0.0147376	0.760862	-0.0147333	0	0.014735	-0.0147333	0.0147333	-0.0147333	-2.7e-10	-2.78e-16	0.00017233	0.0147333	0.622437	-0.0147333	0.00017233	0.0147333	-0.0147341	0.0147333	0	0.0147333	0.0147333	-0.0147341	-0.0001724	0	0	-0.0147341	0.0147333
MTORC1_SIGNALING	3.98164	0.712258	0.826437	-0.0001724	0	0.331291	0.0147385	2.76116	-0.014735	1.18567	1.39146e-16	1.08536	-2.01e-06	0.319946	-2.01e-06	0	-0.0001724	-0.0001724	-0.0001725	1.89056	1.39146e-16	-0.000174	-0.0147376	1.02261	-0.0147333	0	0.014735	-0.0147333	0.0147333	-0.0147333	0.454819	0.611076	0.00017233	0.0147333	1.26585	-0.0147333	0.00017233	0.0147333	-0.0147341	0.0147333	0	0.0147333	0.0147333	-0.0147341	-0.0001724	0	0	-0.0147341	0.0147333
SPERMATOGENESIS	5.58515	0.999208	-3.1e-07	-4.91e-05	0	0	0.00788488	0.350036	-0.007883	0.413502	0.846943	-4.92e-05	-3.03e-07	0.448712	-3.04e-07	0	-4.91e-05	-4.91e-05	-4.92e-05	0.606795	0	0.48191	-0.0078844	-1.13e-11	-0.0078821	0	-2.4977	-0.0078821	0.0078821	-0.0078821	-1.16e-11	-1.49158	4.91091e-05	0.0078821	1.86388	-0.0078821	4.91091e-05	0.0078821	-0.0078826	0.0078821	0	0.0078821	0.0078821	-0.0078826	-4.91e-05	0	0	-0.0078826	0.0078821
MITOTIC_SPINDLE	9.65311	0	0.445941	-0.0001707	0	0.636526	0.0146648	1.878	-0.0146613	1.75456	2.78292e-16	-0.0001707	-1.98e-06	0.632621	-1.98e-06	0	-0.0001707	-0.0001706	-0.0001708	0.82611	1.39146e-16	-0.0001723	-0.0146639	0.251342	-0.0146596	0	0.0146613	-0.0146596	0.0146596	-0.0146596	0.455723	0.884524	0.00017061	0.0146596	0.308169	-0.0146596	0.00017061	0.0146596	-0.0146605	0.0146596	0	0.0146596	0.0146596	-0.0146605	-0.0001706	0	0	-0.0146605	0.0146596
COAGULATION	0.46481	5.84823	0.562825	-5.98e-05	0	1.33707	0.00869549	-1.13224	-0.0086934	-6.06e-05	1.39146e-16	-6e-05	-4.08e-07	0.426215	-4.08e-07	0	-5.98e-05	-5.98e-05	-5.98e-05	1.24651	0	0.98365	2.11764	-2.11629	-0.0086924	0	0.00869345	-0.0086924	0.00869243	-0.0086924	0.589869	1.16011	5.97779e-05	0.00869243	1.20938	-0.0086924	5.97779e-05	0.00869243	-0.0086929	0.00869243	0	0.00869243	0.00869243	-0.0086929	-5.98e-05	0	0	-0.0086929	0.00869243
EPITHELIAL_MESENCHYMAL_TRANSITION	1.08893	6.01063	-1.7e-06	-0.0001539	0	1.03283	0.0139278	-0.872643	-0.0139245	0.884616	1.21849	3.34415	-1.69e-06	2.06172	-1.69e-06	0	2.13256	-0.0001539	-0.000154	1.406	0	2.05731	-0.013927	-3.24227	-0.0139229	0	0.0139245	-0.0139229	0.0139229	-0.0139229	-2.03e-10	0.310116	0.00015385	0.0139229	-2.32508	-0.0139229	0.00015385	0.0139229	-0.0139237	0.0139229	0	0.0139229	0.0139229	-0.0139237	-0.0001539	0	0	-0.0139237	0.0139229
INFLAMMATORY_RESPONSE	1.08592	1.44385	5.28272	-0.0001572	0	6.66842	0.0140752	0.534609	2.28688	1.22755	0.530781	0.748861	-1.75e-06	1.60581	-1.75e-06	0	-0.0001572	-0.0001572	-0.0001573	-2.29011	0	0.77078	-0.0140744	6.861	-0.0140702	0	0.0140719	-2.53558	0.0140702	-0.0140702	0.462559	0.622961	0.00015713	0.0140702	6.1276	-0.0140702	0.00015713	0.0140702	-0.0140711	0.0140702	0	0.0140702	0.0140702	-0.0140711	-0.0001572	0	0	-0.0140711	0.0140702
INTERFERON_GAMMA_RESPONSE	1.07182	0	19.3595	-0.0001707	1.97919	16.3726	0.0146648	0.769001	-0.0146613	1.51188	2.78292e-16	1.42601	-1.98e-06	2.39855	-1.98e-06	0	-0.0001707	-0.0001706	-0.0001708	0.442477	1.39146e-16	1.09892	-0.0146639	3.366	-0.0146596	0	0.0146613	-2.52118	0.0146596	-0.0146596	-2.63e-10	-2.17231	0.00017061	0.0146596	3.87618	-0.0146596	2.27144	0.0146596	-0.0146605	0.0146596	0	0.0146596	0.0146596	-0.0146605	-0.0001706	0	0	-0.0146605	0.0146596
INTERFERON_ALPHA_RESPONSE	0.482074	0.482497	19.2577	-4.03e-05	1.4127	12.8761	0.00714796	1.10658	-0.0071463	1.32868	1.39146e-16	0.48288	-2.25e-07	0.465686	-2.25e-07	0	-4.03e-05	-4.03e-05	-4.04e-05	0.660146	0	0.497021	-0.0071475	1.49221	-0.0071454	0	0.00714628	-0.0071454	0.00714544	-0.0071454	0.696559	1.39146e-16	4.03195e-05	0.00714544	-1.12031	-0.0071454	4.03195e-05	0.00714544	-0.0071459	0.00714544	0	0.00714544	0.00714544	-0.0071459	-4.03e-05	0	0	-0.0071459	0.00714544
APOPTOSIS	0	1.71349	1.63566	-0.0001047	0	4.20979	0.0114958	2.92634	-0.0114931	0.650656	2.73334	1.22218	-9.49e-07	3.68759	-9.49e-07	0	-0.0001047	-0.0001047	-0.0001048	0.477972	1.39146e-16	0.82147	-0.0114952	-1.99866	-0.0114918	0	0.0114931	-0.0114918	0.0114918	-0.0114918	1.06272	2.65758	0.0001047	0.0114918	3.20105	-0.0114918	0.0001047	0.0114918	-0.0114925	0.0114918	0	0.0114918	0.0114918	-0.0114925	-0.0001047	0	0	-0.0114925	0.0114918
IL6_JAK_STAT3_SIGNALING	0	1.89763	3.60947	2.34273	0	5.3932	0.00604259	0.420524	-0.0060412	-2.89e-05	0.992036	0.558201	-1.35e-07	0.481493	-1.35e-07	0	-2.88e-05	-2.88e-05	-2.88e-05	1.55339	0	-2.93e-05	-0.0060422	4.95692	-0.0060405	0	0.00604117	-0.0060405	0.00604046	-0.0060405	-2.98e-12	0	2.87588e-05	0.00604046	4.83536	-0.0060405	2.87588e-05	0.00604046	-0.0060408	0.00604046	0	0.00604046	0.00604046	-0.0060408	-2.88e-05	0	0	-0.0060408	0.00604046
ALLOGRAFT_REJECTION	1.08592	0.349753	1.97084	2.01254	1.06362	4.20521	0.0140752	1.08356	-0.0140719	3.00365	1.20942	1.96369	-2.12828	6.51098	-1.75e-06	0	-0.0001572	-0.0001572	-0.0001573	-0.0001578	0	-0.0001586	-0.0140744	4.44508	-0.0140702	0	0.0140719	-2.53558	0.0140702	-0.0140702	1.46834	-1.20127	0.00015713	0.0140702	-3.64481	-0.0140702	2.28691	0.0140702	2.53556	0.0140702	0	0.0140702	0.0140702	-0.0140711	-0.0001572	0	0	-0.0140711	0.0140702
TNFA_SIGNALING_VIA_NFKB	1.07565	1.4023	2.97038	-0.0001673	0	4.88048	0.0145174	0.260736	-0.014514	-0.0001672	1.39146e-16	1.91723	-1.92e-06	0.32313	-1.92e-06	0	-0.0001672	-0.0001672	1.5983	0.444648	0	0.356058	-0.0145165	6.81408	-0.0145123	0	0.014514	-0.0145123	0.0145123	-0.0145123	0.4575	-2.78e-16	0.00016718	0.0145123	-7.3068	-0.0145123	0.00016718	0.0145123	-0.0145131	0.0145123	0	0.0145123	0.0145123	-0.0145131	-0.0001672	0	0	-0.0145131	0.0145123
HEME_METABOLISM	0.347757	2.3292	0.826568	-0.000169	0	1.32866	0.0145911	16.4315	-0.0145876	0.881812	1.39146e-16	1.08827	-1.95e-06	1.5601	-1.95e-06	0	-0.000169	-0.0001689	-0.0001691	-0.0001696	2.78292e-16	0.354236	1.9044	0.515799	-0.0145859	0	0.0145876	-0.0145859	0.0145859	-0.0145859	17.0726	12.8556	0.00016889	0.0145859	0.624581	-0.0145859	0.00016889	0.0145859	-0.0145868	0.0145859	0	0.0145859	0.0145859	-0.0145868	-0.0001689	0	0	-0.0145868	0.0145859
OXIDATIVE_PHOSPHORYLATION	1.06984	1.07611	0.826437	-0.0001724	1.03889	5.56583e-16	0.0147385	1.05662	-0.014735	7.53918	1.39146e-16	1.08536	-2.01e-06	1.55992	-2.01e-06	0	-0.0001724	-0.0001724	-0.0001725	0.825926	1.39146e-16	-0.000174	-0.0147376	1.28781	-0.0147333	0	0.014735	-0.0147333	0.0147333	-2.51941	0.454819	0.884433	0.00017233	0.0147333	1.55133	-0.0147333	0.00017233	0.0147333	-0.0147341	0.0147333	0	0.0147333	2.51941	-0.0147341	-0.0001724	0	0	-0.0147341	0.0147333
UV_RESPONSE_UP	1.19444	0	0.480231	-0.0001007	0	2.50599	0.0112748	2.97981	-0.0112721	0.340807	0	-0.0001015	-8.95e-07	0.350004	-8.95e-07	0	-0.0001007	-0.0001007	3.93929	0.479291	0	1.30259	-0.0112741	0.877318	-0.0112708	0	0.0112721	-0.0112708	0.0112708	-0.0112708	1.07957	2.24941	0.0001007	0.0112708	3.64501	-0.0112708	0.0001007	0.0112708	-0.0112714	0.0112708	0	0.0112708	0.0112708	-0.0112714	-0.0001007	0	0	-0.0112714	0.0112708
P53_PATHWAY	0.348043	1.4023	0.826586	-0.0001673	0	2.52191	0.0145174	-0.855188	-0.014514	2.15127	1.39146e-16	1.08965	-1.92e-06	2.78292e-16	-1.92e-06	0	-0.0001672	-0.0001672	-0.0001674	0.826384	0	-0.0001688	-0.0145165	-1.90657	-0.0145123	0	0.014514	-0.0145123	0.0145123	-0.0145123	-1.90366	0.61538	0.00016718	0.0145123	5.98431	-0.0145123	0.00016718	0.0145123	-0.0145131	0.0145123	0	0.0145123	0.0145123	-0.0145131	-0.0001672	0	0	-0.0145131	0.0145123
COMPLEMENT	1.08271	1.90633	2.49148	-0.0001605	1.39146e-16	3.38913	0.0142226	0.265212	-0.0142192	0.607866	0.525252	0.744082	-1.8e-06	0.327177	-1.8e-06	0	-0.0001605	-0.0001605	-0.0001606	0.826546	0	-0.000162	-0.0142218	3.45288	-0.0142176	0	0.0142192	-0.0142176	0.0142176	-0.0142176	0.460919	1.39146e-16	0.00016045	0.0142176	2.36334	-0.0142176	0.00016045	0.0142176	-0.0142184	0.0142176	0	0.0142176	0.0142176	-0.0142184	-0.0001605	0	0	-0.0142184	0.0142176
[truncated: 21 more columns]

## Sheet: Small gene set-driven TC (F2)
ENS GENE ID	GENE SYMBOL	TC28	TC865	TC1093	TC1125	TC1175	TC1238					TC28	TC671	TC865	TC1093	TC1125	TC1175	TC1238
ENSG00000235291	PPP1R10	50.2562	0.1	0.1	0.1	0.1	0.1				PPP1R10_ENSG00000235291	50.2562	-0.183521	0.0482059	-0.219945	-0.0586397	-0.0584588	-0.0141471
ENSG00000231737	PPP1R10	50.2562	0.1	0.1	0.1	0.1	0.1				PPP1R10_ENSG00000231737	50.2562	-0.183521	0.0482059	-0.219945	-0.0586397	-0.0584588	-0.0141471
ENSG00000238104	PPP1R10	50.2369	0.1	0.1	0.1	0.1	0.1				PPP1R10_ENSG00000238104	50.2369	-0.171069	0.053632	-0.221544	-0.0619626	-0.0498154	-0.0282674
ENSG00000230995	PPP1R10	50.2369	0.1	0.1	0.1	0.1	0.1				PPP1R10_ENSG00000230995	50.2369	-0.171069	0.053632	-0.221544	-0.0619626	-0.0498154	-0.0282674
ENSG00000227804	PPP1R10	50.2369	0.1	0.1	0.1	0.1	0.1				PPP1R10_ENSG00000227804	50.2369	-0.171069	0.053632	-0.221544	-0.0619626	-0.0498154	-0.0282674
ENSG00000206489	PPP1R10	46.8297	0.1	0.1	0.1	0.1	0.1				PPP1R10_ENSG00000206489	46.8297	0.0935371	-0.140386	-0.198385	-0.388515	0.195061	0.145524
ENSG00000115353	TACR1	3.40326	0.1	0.1	0.1	0.1	0.1				TACR1_ENSG00000115353	3.40326	0.77488	1.45242	-0.230965	-0.443886	-0.474241	0.192677
ENSG00000243710	CFAP57	-3.1562	0.1	0.1	0.1	0.1	0.1				CFAP57_ENSG00000243710	-3.1562	0.183084	-0.773972	0.178586	-0.609392	-0.620215	1.25507
ENSG00000204569	PPP1R10	-40.5288	0.1	0.1	0.1	0.1	0.1				PPP1R10_ENSG00000204569	-40.5288	-0.470235	0.0305962	-0.249321	-0.461436	-0.233897	-0.188407
ENSG00000238130	LTA	0.1	129.001	0.1	0.1	0.1	0.1				GPANK1_ENSG00000228605	-0.210527	92.9454	-0.0859267	-0.3826	-0.0498258	0.0545606	0.0275844
ENSG00000225073	DDX39B	0.1	39.5068	0.1	0.1	0.1	0.1				GPANK1_ENSG00000206408	-0.210527	92.9454	-0.0859267	-0.3826	-0.0498258	0.0545606	0.0275844
ENSG00000227587	ATP6V1G2	0.1	13.08	0.1	0.1	0.1	0.1				CSNK2B_ENSG00000206406	0.545052	17.3145	0.125463	0.627627	0.17454	-0.545849	0.276222
ENSG00000206433	LST1	0.1	4.44991	0.1	0.1	0.1	0.1				LY6G5B_ENSG00000241713	-0.0401861	6.08842	0.713545	-0.239228	0.388407	0.0521664	0.0584111
ENSG00000225859	DDX39B	0.1	-3.35696	0.1	0.1	0.1	0.1				PRRC2A_ENSG00000225164	0.199569	5.00759	0.103611	0.702746	-0.398632	0.251947	-0.0982357
ENSG00000229215	HLA-A	0.1	0.1	99.0041	0.1	0.1	0.1				LTA_ENSG00000238130	0.302821	-0.104581	129.001	-0.0793249	0.344177	0.477912	0.561467
ENSG00000224320	HLA-A	0.1	0.1	99.0041	0.1	0.1	0.1				DDX39B_ENSG00000225073	-0.334903	-0.407562	39.5068	-0.365014	-1.13233	1.11551	-0.38258
ENSG00000206341	HLA-H	0.1	0.1	8.24939	0.1	0.1	0.1				ATP6V1G2_ENSG00000227587	-0.150917	0.264407	13.08	-0.284129	-0.179396	-0.244102	-0.229023
ENSG00000234831	ENSG00000234831	0.1	0.1	6.53161	0.1	0.1	0.1				LST1_ENSG00000206433	0.58936	0.786659	4.44991	-0.316336	-1.03989	0.0870222	-0.792773
ENSG00000223708	ENSG00000223708	0.1	0.1	6.53161	0.1	0.1	0.1				DDX39B_ENSG00000225859	0.82032	-0.562141	-3.35696	0.145336	0.226435	0.384269	-0.277549
ENSG00000229390	MICD	0.1	0.1	6.2456	0.1	0.1	0.1				HLA-A_ENSG00000229215	-0.260261	-0.295215	-0.0811882	99.0041	-0.472752	-0.11817	0.0441597
ENSG00000224859	POLR1H	0.1	0.1	5.88622	0.1	0.1	0.1				HLA-A_ENSG00000224320	-0.260261	-0.295215	-0.0811882	99.0041	-0.472752	-0.11817	0.0441597
ENSG00000227858	ZFP57	0.1	0.1	4.27446	0.1	0.1	0.1				HLA-H_ENSG00000206341	-0.255868	0.281674	-0.281192	8.24939	0.442529	-0.395581	0.132586
ENSG00000228029	HLA-W	0.1	0.1	3.77617	0.1	0.1	0.1				_ENSG00000234831	0.148561	0.27291	0.216329	6.53161	0.219055	0.181371	0.15037
ENSG00000232708	HLA-K	0.1	0.1	-3.42772	0.1	0.1	0.1				_ENSG00000223708	0.148561	0.27291	0.216329	6.53161	0.219055	0.181371	0.15037
ENSG00000230795	HLA-K	0.1	0.1	-5.10867	0.1	0.1	0.1				MICD_ENSG00000229390	-0.456877	0.274131	1.25652	6.2456	-0.609488	-0.148878	-0.748187
ENSG00000229998	PPP1R18	0.1	0.1	0.1	99.1903	0.1	0.1				POLR1H_ENSG00000224859	-0.45323	-0.19533	0.0355147	5.88622	-2.18353	-0.0446961	-0.10464
ENSG00000225060	PPP1R18	0.1	0.1	0.1	99.1903	0.1	0.1				ZFP57_ENSG00000227858	-0.00414572	0.480821	-0.0646831	4.27446	-0.679154	-0.299854	0.287289
ENSG00000206485	PPP1R18	0.1	0.1	0.1	9.85055	0.1	0.1				HLA-W_ENSG00000228029	-0.577799	-0.763545	0.413922	3.77617	-0.231718	0.572734	-0.536973
ENSG00000226882	GNL1	0.1	0.1	0.1	4.12264	0.1	0.1				HLA-K_ENSG00000232708	-0.314492	0.385387	0.0239192	-3.42772	-0.296725	-0.964216	-0.329171
ENSG00000234012	MDC1	0.1	0.1	0.1	-9.67413	0.1	0.1				HLA-K_ENSG00000230795	0.181983	-0.219292	0.130139	-5.10867	-0.435448	-0.337602	0.121848
ENSG00000225589	MDC1	0.1	0.1	0.1	-9.67413	0.1	0.1				PPP1R18_ENSG00000229998	-0.0522088	-0.0755405	0.0577528	-0.290459	99.1903	-0.0511427	-0.0979116
ENSG00000206306	HLA-DRB1	0.1	0.1	0.1	0.1	88.267	0.1				PPP1R18_ENSG00000225060	-0.0522088	-0.0755405	0.0577528	-0.290459	99.1903	-0.0511427	-0.0979116
ENSG00000206240	HLA-DRB1	0.1	0.1	0.1	0.1	88.267	0.1				PPP1R18_ENSG00000206485	-0.166719	-0.130051	0.177528	0.217382	9.85055	-0.395533	-0.184559
ENSG00000231679	HLA-DRB3	0.1	0.1	0.1	0.1	12.8481	0.1				GNL1_ENSG00000226882	-0.84106	-0.199549	0.912346	-0.54239	4.12264	-0.73297	-0.980587
ENSG00000233697	HLA-DRB8	0.1	0.1	0.1	0.1	4.48532	0.1				MDC1_ENSG00000234012	0.119874	-0.0984884	0.590291	1.18207	-9.67413	-0.605813	-0.32275
ENSG00000085552	IGSF9	0.1	0.1	0.1	0.1	-3.06745	0.1				MDC1_ENSG00000225589	0.119874	-0.0984884	0.590291	1.18207	-9.67413	-0.605813	-0.32275
ENSG00000225920	RIMKLBP2	0.1	0.1	0.1	0.1	-3.11883	0.1				HLA-DRB1_ENSG00000206306	0.0522825	0.075045	0.40097	-0.0471578	-0.0895487	88.267	-0.0933699
ENSG00000226084	ENSG00000226084	0.1	0.1	0.1	0.1	-3.16103	0.1				HLA-DRB1_ENSG00000206240	0.0522825	0.075045	0.40097	-0.0471578	-0.0895487	88.267	-0.0933699
ENSG00000188089	PLA2G4E	0.1	0.1	0.1	0.1	-3.17522	0.1				HLA-DRB3_ENSG00000231679	-0.0311381	-0.40128	-0.00960467	-0.387137	0.0385207	12.8481	0.008066
ENSG00000267127	ENSG00000267127	0.1	0.1	0.1	0.1	-3.26367	0.1				HLA-DRB8_ENSG00000233697	-0.0515372	-0.278036	-0.947056	-0.321714	0.234609	4.48532	0.371325
ENSG00000125823	CSTL1	0.1	0.1	0.1	0.1	-3.37576	0.1				IGSF9_ENSG00000085552	0.128833	0.414993	-0.287727	0.0269719	0.711131	-3.06745	0.377035
ENSG00000230463	HLA-DRB3	0.1	0.1	0.1	0.1	-25.945	0.1				RIMKLBP2_ENSG00000225920	0.597553	-1.07418	-0.510906	-0.273112	-0.742175	-3.11883	0.0580204
ENSG00000234114	CCHCR1	0.1	0.1	0.1	0.1	0.1	101.635				_ENSG00000226084	0.00454207	0.393771	0.0136223	0.0294137	-0.0423256	-3.16103	0.283388
ENSG00000206355	CCHCR1	0.1	0.1	0.1	0.1	0.1	100.347				PLA2G4E_ENSG00000188089	-0.216668	0.469884	-0.309043	0.0183023	0.797086	-3.17522	0.464847
ENSG00000233890	TCF19	0.1	0.1	0.1	0.1	0.1	3.66187				_ENSG00000267127	-1.04848	0.701075	-0.00303748	-0.88	0.120446	-3.26367	-0.102957
ENSG00000224379	TCF19	0.1	0.1	0.1	0.1	0.1	3.22523				CSTL1_ENSG00000125823	1.83504	-0.461651	-0.446295	-0.652764	0.252387	-3.37576	0.288321
ENSG00000204536	CCHCR1	0.1	0.1	0.1	0.1	0.1	-4.39241				HLA-DRB3_ENSG00000230463	-0.357318	0.403952	-0.571219	-0.0909138	-0.301264	-25.945	0.397372
ENSG00000206457	CCHCR1	0.1	0.1	0.1	0.1	0.1	-5.81343				CCHCR1_ENSG00000234114	-0.0777225	0.206011	0.189751	0.113235	-0.0520702	-0.0575389	101.635
											CCHCR1_ENSG00000206355	0.119228	-0.0582982	0.213062	-0.120991	0.0204568	-0.288395	100.347
											TCF19_ENSG00000233890	0.252805	0.321259	-0.0245213	-0.126444	-0.278431	-0.0350239	3.66187
											TCF19_ENSG00000224379	-0.0891236	-0.387786	0.458689	0.027074	-0.725299	0.0595595	3.22523
											CCHCR1_ENSG00000204536	-0.534725	-0.0546705	-0.948949	0.640102	0.256472	-0.117301	-4.3924
											CCHCR1_ENSG00000206457	0.180432	0.223867	0.475339	0.648561	0.614555	0.282286	-5.81343

## Sheet: SNP TCs (SF3)
tc_id	snv_name	num_samples_with_variant	mwu_pvalue_and_directionsign	gene_id	snp_id	chrom	pos	ref_base	alt_base	coding	hugo	transcript	variant_type	cchange	achange	all_mappings		tags
TC1093	HLA-A_chr6:29942499_T>G_rs41560714	51	-1.57783e-06	HLA-A	rs41560714	chr6	29942499	T	G		HLA-A	ENST00000376809.10	2kb_upstream_variant	c.-55T>G		ENST00000376802.2:HLA-A::2kb_upstream_variant::c.-55T>G; ENST00000376806.9:HLA-A::5_prime_UTR_variant::c.-55T>G; ENST00000376809.10:HLA-A:P16188:2kb_upstream_variant::c.-55T>G; ENST00000396634.5:HLA-A:P16188:5_prime_UTR_variant::c.-55T>G		rs2071594
TC1093	HLA-A_chr6:29942581_C>G_rs1143146	101	-0.000817111	HLA-A	rs1143146	chr6	29942581	C	G	Yes	HLA-A	ENST00000376809.10	missense_variant	c.28C>G	p.Leu10Val	ENST00000376802.2:HLA-A::missense_variant:p.Leu10Val:c.28C>G; ENST00000376806.9:HLA-A::missense_variant:p.Leu10Val:c.28C>G; ENST00000376809.10:HLA-A:P16188:missense_variant:p.Leu10Val:c.28C>G; ENST00000396634.5:HLA-A:P16188:missense_variant:p.Leu10Val:c.28C>G		rs1576
TC1093	HLA-A_chr6:29942719_C>G_rs2904759	15	6.812e-06	HLA-A	rs2904759	chr6	29942719	C	G		HLA-A	ENST00000376809.10	intron_variant	c.74-38C>G		ENST00000376802.2:HLA-A::intron_variant::c.74-38C>G; ENST00000376806.9:HLA-A::intron_variant::c.74-38C>G; ENST00000376809.10:HLA-A:P16188:intron_variant::c.74-38C>G; ENST00000396634.5:HLA-A:P16188:intron_variant::c.74-38C>G		rs130079
TC1093	HLA-A_chr6:29942745_G>C_rs9260130	13	-9.58458e-05	HLA-A	rs9260130	chr6	29942745	G	C		HLA-A	ENST00000376809.10	intron_variant	c.74-12G>C		ENST00000376802.2:HLA-A::intron_variant::c.74-12G>C; ENST00000376806.9:HLA-A::intron_variant::c.74-12G>C; ENST00000376809.10:HLA-A:P16188:intron_variant::c.74-12G>C; ENST00000396634.5:HLA-A:P16188:intron_variant::c.74-12G>C		rs130068
TC1093	HLA-A_chr6:29942886_G>A_rs707910	45	1.23065e-21	HLA-A	rs707910	chr6	29942886	G	A	Yes	HLA-A	ENST00000376809.10	missense_variant	c.203G>A	p.Arg68Lys	ENST00000376802.2:HLA-A::missense_variant:p.Arg68Lys:c.203G>A; ENST00000376806.9:HLA-A::missense_variant:p.Arg68Lys:c.203G>A; ENST00000376809.10:HLA-A:P16188:missense_variant:p.Arg68Lys:c.203G>A; ENST00000396634.5:HLA-A:P16188:missense_variant:p.Arg68Lys:c.203G>A		rs130067
TC1093	HLA-A_chr6:29943115_A>G_rs9260145	61	-1.96442e-12	HLA-A	rs9260145	chr6	29943115	A	G		HLA-A	ENST00000376809.10	intron_variant	c.343+89A>G		ENST00000376802.2:HLA-A::intron_variant::c.343+89A>G; ENST00000376806.9:HLA-A::intron_variant::c.343+89A>G; ENST00000376809.10:HLA-A:P16188:intron_variant::c.343+89A>G; ENST00000396634.5:HLA-A:P16188:intron_variant::c.343+89A>G		rs9281523
TC1093	HLA-A_chr6:29943133_C>T_rs9260146	25	3.65032e-09	HLA-A	rs9260146	chr6	29943133	C	T		HLA-A	ENST00000376809.10	intron_variant	c.343+107C>T		ENST00000376802.2:HLA-A::intron_variant::c.343+107C>T; ENST00000376806.9:HLA-A::intron_variant::c.343+107C>T; ENST00000376809.10:HLA-A:P16188:intron_variant::c.343+107C>T; ENST00000396634.5:HLA-A:P16188:intron_variant::c.343+107C>T		rs77689490
TC1093	HLA-A_chr6:29943146_C>T_rs9260147	25	7.17811e-10	HLA-A	rs9260147	chr6	29943146	C	T		HLA-A	ENST00000376809.10	intron_variant	c.343+120C>T		ENST00000376802.2:HLA-A::intron_variant::c.343+120C>T; ENST00000376806.9:HLA-A::intron_variant::c.343+120C>T; ENST00000376809.10:HLA-A:P16188:intron_variant::c.343+120C>T; ENST00000396634.5:HLA-A:P16188:intron_variant::c.343+120C>T		rs11796
TC1093	HLA-A_chr6:29943309_T>C_rs1136700	23	4.97271e-09	HLA-A	rs1136700	chr6	29943309	T	C	Yes	HLA-A	ENST00000376809.10	missense_variant	c.385T>C	p.Ser129Pro	ENST00000376802.2:HLA-A::missense_variant:p.Ser129Pro:c.385T>C; ENST00000376806.9:HLA-A::missense_variant:p.Ser129Pro:c.385T>C; ENST00000376809.10:HLA-A:P16188:missense_variant:p.Ser129Pro:c.385T>C; ENST00000396634.5:HLA-A:P16188:missense_variant:p.Ser129Pro:c.385T>C		rs1055384
TC1093	HLA-A_chr6:29943479_T>G_rs1059542	27	-1.35394e-05	HLA-A	rs1059542	chr6	29943479	T	G	Yes	HLA-A	ENST00000376809.10	missense_variant	c.555T>G	p.Asp185Glu	ENST00000376802.2:HLA-A::missense_variant:p.Asp185Glu:c.555T>G; ENST00000376806.9:HLA-A::missense_variant:p.Asp185Glu:c.555T>G; ENST00000376809.10:HLA-A:P16188:missense_variant:p.Asp185Glu:c.555T>G; ENST00000396634.5:HLA-A:P16188:missense_variant:p.Asp185Glu:c.555T>G		rs3830668
TC1093	HLA-A_chr6:29944193_G>A_rs9260180	79	-1.54465e-07	HLA-A	rs9260180	chr6	29944193	G	A	Yes	HLA-A	ENST00000376809.10	missense_variant	c.691G>A	p.Gly231Ser	ENST00000376802.2:HLA-A::missense_variant:p.Gly231Ser:c.691G>A; ENST00000376806.9:HLA-A::missense_variant:p.Gly231Ser:c.691G>A; ENST00000376809.10:HLA-A:P16188:missense_variant:p.Gly231Ser:c.691G>A; ENST00000396634.5:HLA-A:P16188:missense_variant:p.Gly231Ser:c.691G>A		rs34788230
TC1093	HLA-A_chr6:29944310_G>T_rs1059632	23	-0.000422529	HLA-A	rs1059632	chr6	29944310	G	T	Yes	HLA-A	ENST00000376809.10	missense_variant	c.808G>T	p.Ala270Ser	ENST00000376802.2:HLA-A::missense_variant:p.Ala270Ser:c.808G>T; ENST00000376806.9:HLA-A::missense_variant:p.Ala270Ser:c.808G>T; ENST00000376809.10:HLA-A:P16188:missense_variant:p.Ala270Ser:c.808G>T; ENST00000396634.5:HLA-A:P16188:missense_variant:p.Ala270Ser:c.808G>T		rs2239527
TC1093	HLA-A_chr6:29944331_G>C_rs2231095	89	-9.22629e-09	HLA-A	rs2231095	chr6	29944331	G	C	Yes	HLA-A	ENST00000376809.10	missense_variant	c.829G>C	p.Glu277Gln	ENST00000376802.2:HLA-A::missense_variant:p.Glu277Gln:c.829G>C; ENST00000376806.9:HLA-A::missense_variant:p.Glu277Gln:c.829G>C; ENST00000376809.10:HLA-A:P16188:missense_variant:p.Glu277Gln:c.829G>C; ENST00000396634.5:HLA-A:P16188:missense_variant:p.Glu277Gln:c.829G>C		rs7029
TC1093	HLA-A_chr6:29944503_T>C_rs1136903	81	-1.8526e-10	HLA-A	rs1136903	chr6	29944503	T	C	Yes	HLA-A	ENST00000376809.10	missense_variant	c.899T>C	p.Leu300Pro	ENST00000376802.2:HLA-A::intron_variant::c.895+106T>C; ENST00000376806.9:HLA-A::missense_variant:p.Leu300Pro:c.899T>C; ENST00000376809.10:HLA-A:P16188:missense_variant:p.Leu300Pro:c.899T>C; ENST00000396634.5:HLA-A:P16188:missense_variant:p.Leu300Pro:c.899T>C		rs3130618
TC1093	HLA-A_chr6:29944556_C>T_rs3179982	78	-3.22419e-07	HLA-A	rs3179982	chr6	29944556	C	T	Yes	HLA-A	ENST00000376809.10	missense_variant	c.952C>T	p.Leu318Phe	ENST00000376802.2:HLA-A::intron_variant::c.895+159C>T; ENST00000376806.9:HLA-A::missense_variant:p.Leu318Phe:c.952C>T; ENST00000376809.10:HLA-A:P16188:missense_variant:p.Leu318Phe:c.952C>T; ENST00000396634.5:HLA-A:P16188:missense_variant:p.Leu318Phe:c.952C>T		rs2295665
TC1093	HLA-A_chr6:29944621_A>G_rs9260191	70	-0.000106682	HLA-A	rs9260191	chr6	29944621	A	G		HLA-A	ENST00000376809.10	intron_variant	c.1012+5A>G		ENST00000376802.2:HLA-A::intron_variant::c.895+224A>G; ENST00000376806.9:HLA-A::synonymous_variant:p.Gly339=:c.1017A>G; ENST00000376809.10:HLA-A:P16188:intron_variant::c.1012+5A>G; ENST00000396634.5:HLA-A:P16188:intron_variant::c.1012+5A>G		rs41560714
TC1093	HLA-A_chr6:29944637_G>-_rs9278466	76	-2.98412e-06	HLA-A	rs9278466	chr6	29944637	G	-		HLA-A	ENST00000376809.10	intron_variant	c.1012+24del		ENST00000376802.2:HLA-A::intron_variant::c.895+243del; ENST00000376806.9:HLA-A::intron_variant::c.1030+6del; ENST00000376809.10:HLA-A:P16188:intron_variant::c.1012+24del; ENST00000396634.5:HLA-A:P16188:intron_variant::c.1012+24del		rs1143146
TC1093	HLA-A_chr6:29944818_G>A_rs2975058	81	-1.85161e-05	HLA-A	rs2975058	chr6	29944818	G	A		HLA-A	ENST00000376809.10	intron_variant	c.1012+202G>A		ENST00000376802.2:HLA-A::intron_variant::c.895+421G>A; ENST00000376806.9:HLA-A::intron_variant::c.1030+184G>A; ENST00000376809.10:HLA-A:P16188:intron_variant::c.1012+202G>A; ENST00000396634.5:HLA-A:P16188:intron_variant::c.1012+202G>A		rs2904759
TC1093	HLA-A_chr6:29944876_AGA>-_rs67131684	104	-5.12585e-06	HLA-A	rs67131684	chr6	29944876	AGA	-		HLA-A	ENST00000376809.10	intron_variant	c.1013-183_1013-181del		ENST00000376802.2:HLA-A::intron_variant::c.895+479_895+481del; ENST00000376806.9:HLA-A::intron_variant::c.1031-183_1031-181del; ENST00000376809.10:HLA-A:P16188:intron_variant::c.1013-183_1013-181del; ENST00000396634.5:HLA-A:P16188:intron_variant::c.1013-183_1013-181del		rs9260130
TC1093	HLA-A_chr6:29944977_G>A_rs3823323	104	-1.13631e-08	HLA-A	rs3823323	chr6	29944977	G	A		HLA-A	ENST00000376809.10	intron_variant	c.1013-82G>A		ENST00000376802.2:HLA-A::intron_variant::c.896-474G>A; ENST00000376806.9:HLA-A::intron_variant::c.1031-82G>A; ENST00000376809.10:HLA-A:P16188:intron_variant::c.1013-82G>A; ENST00000396634.5:HLA-A:P16188:intron_variant::c.1013-82G>A		rs707910
TC1093	HLA-A_chr6:29944989_A>T_rs3823324	101	-3.47282e-08	HLA-A	rs3823324	chr6	29944989	A	T		HLA-A	ENST00000376809.10	intron_variant	c.1013-70A>T		ENST00000376802.2:HLA-A::intron_variant::c.896-462A>T; ENST00000376806.9:HLA-A::intron_variant::c.1031-70A>T; ENST00000376809.10:HLA-A:P16188:intron_variant::c.1013-70A>T; ENST00000396634.5:HLA-A:P16188:intron_variant::c.1013-70A>T		rs9260145
TC1093	HLA-A_chr6:29945019_G>A_rs2735103	84	-2.26662e-07	HLA-A	rs2735103	chr6	29945019	G	A		HLA-A	ENST00000376809.10	intron_variant	c.1013-40G>A		ENST00000376802.2:HLA-A::intron_variant::c.896-432G>A; ENST00000376806.9:HLA-A::intron_variant::c.1031-40G>A; ENST00000376809.10:HLA-A:P16188:intron_variant::c.1013-40G>A; ENST00000396634.5:HLA-A:P16188:intron_variant::c.1013-40G>A		rs9260146
TC1093	HLA-A_chr6:29945053_T>C_rs2571381	22	2.54692e-07	HLA-A	rs2571381	chr6	29945053	T	C		HLA-A	ENST00000376809.10	intron_variant	c.1013-6T>C		ENST00000376802.2:HLA-A::intron_variant::c.896-398T>C; ENST00000376806.9:HLA-A::intron_variant::c.1031-6T>C; ENST00000376809.10:HLA-A:P16188:intron_variant::c.1013-6T>C; ENST00000396634.5:HLA-A:P16188:intron_variant::c.1013-6T>C		rs9260147
TC1093	HLA-A_chr6:29945597_C>G_rs1061815	45	1.13454e-20	HLA-A	rs1061815	chr6	29945597	C	G		HLA-A	ENST00000376809.10	3_prime_UTR_variant	c.*142C>G		ENST00000376802.2:HLA-A::3_prime_UTR_variant::c.*142C>G; ENST00000376806.9:HLA-A::3_prime_UTR_variant::c.*142C>G; ENST00000376809.10:HLA-A:P16188:3_prime_UTR_variant::c.*142C>G; ENST00000396634.5:HLA-A:P16188:3_prime_UTR_variant::c.*142C>G		rs1136700
TC1093	HLA-A_chr6:29945653_C>T_rs112863520	55	2.58891e-15	HLA-A	rs112863520	chr6	29945653	C	T		HLA-A	ENST00000376809.10	3_prime_UTR_variant	c.*198C>T		ENST00000376802.2:HLA-A::3_prime_UTR_variant::c.*198C>T; ENST00000376806.9:HLA-A::3_prime_UTR_variant::c.*198C>T; ENST00000376809.10:HLA-A:P16188:3_prime_UTR_variant::c.*198C>T; ENST00000396634.5:HLA-A:P16188:3_prime_UTR_variant::c.*198C>T		rs1059542
TC1093	HLA-A_chr6:29945861_G>C_rs13488	106	-4.95175e-12	HLA-A	rs13488	chr6	29945861	G	C		HLA-A	ENST00000376809.10	3_prime_UTR_variant	c.*406G>C		ENST00000376802.2:HLA-A::3_prime_UTR_variant::c.*406G>C; ENST00000376806.9:HLA-A::3_prime_UTR_variant::c.*406G>C; ENST00000376809.10:HLA-A:P16188:3_prime_UTR_variant::c.*406G>C; ENST00000396634.5:HLA-A:P16188:3_prime_UTR_variant::c.*406G>C		rs9260180
TC1125	PPP1R18_chr6:30685004_C>T_rs9262143	31	-2.79225e-11	PPP1R18	rs9262143	chr6	30685004	C	T	Yes	PPP1R18	ENST00000274853.8	missense_variant	c.1015G>A	p.Gly339Arg	ENST00000274853.8:PPP1R18:Q6NYC8:missense_variant:p.Gly339Arg:c.1015G>A; ENST00000399199.7:PPP1R18:Q6NYC8:missense_variant:p.Gly339Arg:c.1015G>A; ENST00000467662.5:PPP1R18::intron_variant,processed_transcript::; ENST00000488324.1:PPP1R18::intron_variant,processed_transcript::; ENST00000615527.1:PPP1R18:Q6NYC8:missense_variant:p.Gly339Arg:c.1015G>A; ENST00000615892.4:PPP1R18:Q6NYC8:2kb_upstream_va…		rs1059632
TC1175	HLA-DRB1_chr6:32578414_A>G_rs16871402	15	-7.78743e-05	HLA-DRB1	rs16871402	chr6	32578414	A	G		HLA-DRB1	ENST00000360004.5	2kb_downstream_variant	c.*677T>C		ENST00000360004.5:HLA-DRB1:Q9GIY3:2kb_downstream_variant::c.*677T>C		rs2231095
TC1175	HLA-DRB1_chr6:32578433_G>-_rs66850812	57	2.16034e-09	HLA-DRB1	rs66850812	chr6	32578433	G	-		HLA-DRB1	ENST00000360004.5	2kb_downstream_variant	c.*658del		ENST00000360004.5:HLA-DRB1:Q9GIY3:2kb_downstream_variant::c.*658del		rs1136903
TC1175	HLA-DRB1_chr6:32578589_G>A_rs9269666	22	-1.12638e-05	HLA-DRB1	rs9269666	chr6	32578589	G	A		HLA-DRB1	ENST00000360004.5	2kb_downstream_variant	c.*502C>T		ENST00000360004.5:HLA-DRB1:Q9GIY3:2kb_downstream_variant::c.*502C>T		rs3179982
TC1175	HLA-DRB1_chr6:32578716_->CTTC_rs9281861	51	4.71062e-07	HLA-DRB1	rs9281861	chr6	32578716	-	CTTC		HLA-DRB1	ENST00000360004.5	2kb_downstream_variant	c.*372_*375dup		ENST00000360004.5:HLA-DRB1:Q9GIY3:2kb_downstream_variant::c.*372_*375dup		rs9260191
TC1175	HLA-DRB1_chr6:32578723_->TTTTC_rs141643218	54	2.05325e-07	HLA-DRB1	rs141643218	chr6	32578723	-	TTTTC		HLA-DRB1	ENST00000360004.5	2kb_downstream_variant	c.*364_*368dup		ENST00000360004.5:HLA-DRB1:Q9GIY3:2kb_downstream_variant::c.*364_*368dup		rs9278466
TC1175	HLA-DRB1_chr6:32578815_A>G_rs1141883	16	-3.09354e-07	HLA-DRB1	rs1141883	chr6	32578815	A	G		HLA-DRB1	ENST00000360004.5	3_prime_UTR_variant	c.*276T>C		ENST00000360004.5:HLA-DRB1:Q9GIY3:3_prime_UTR_variant::c.*276T>C		rs2975058
TC1175	HLA-DRB1_chr6:32578826_A>G_rs1060270	18	-7.28774e-08	HLA-DRB1	rs1060270	chr6	32578826	A	G		HLA-DRB1	ENST00000360004.5	3_prime_UTR_variant	c.*265T>C		ENST00000360004.5:HLA-DRB1:Q9GIY3:3_prime_UTR_variant::c.*265T>C		rs67131684
TC1175	HLA-DRB1_chr6:32578893_C>T_rs34981130	24	-4.2261e-05	HLA-DRB1	rs34981130	chr6	32578893	C	T		HLA-DRB1	ENST00000360004.5	3_prime_UTR_variant	c.*198G>A		ENST00000360004.5:HLA-DRB1:Q9GIY3:3_prime_UTR_variant::c.*198G>A		rs3823323
TC1175	HLA-DRB1_chr6:32578903_->TG_rs9281863	38	2.97433e-05	HLA-DRB1	rs9281863	chr6	32578903	-	TG		HLA-DRB1	ENST00000360004.5	3_prime_UTR_variant	c.*187_*188dup		ENST00000360004.5:HLA-DRB1:Q9GIY3:3_prime_UTR_variant::c.*187_*188dup		rs3823324
TC1175	HLA-DRB1_chr6:32578966_C>T_rs1064707	72	1.52798e-10	HLA-DRB1	rs1064707	chr6	32578966	C	T		HLA-DRB1	ENST00000360004.5	3_prime_UTR_variant	c.*125G>A		ENST00000360004.5:HLA-DRB1:Q9GIY3:3_prime_UTR_variant::c.*125G>A		rs2735103
TC1175	HLA-DRB1_chr6:32578981_C>T_rs1060129	36	2.96123e-06	HLA-DRB1	rs1060129	chr6	32578981	C	T		HLA-DRB1	ENST00000360004.5	3_prime_UTR_variant	c.*110G>A		ENST00000360004.5:HLA-DRB1:Q9GIY3:3_prime_UTR_variant::c.*110G>A		rs2571381
TC1175	HLA-DRB1_chr6:32579023_->GG_rs753402410	56	1.46751e-12	HLA-DRB1	rs753402410	chr6	32579023	-	GG		HLA-DRB1	ENST00000360004.5	3_prime_UTR_variant	c.*68_*69insCC		ENST00000360004.5:HLA-DRB1:Q9GIY3:3_prime_UTR_variant::c.*68_*69insCC		rs1061815
TC1175	HLA-DRB1_chr6:32579025_CA>-_rs754848562	57	1.46751e-12	HLA-DRB1	rs754848562	chr6	32579025	CA	-		HLA-DRB1	ENST00000360004.5	3_prime_UTR_variant	c.*65_*66del		ENST00000360004.5:HLA-DRB1:Q9GIY3:3_prime_UTR_variant::c.*65_*66del		rs112863520
TC1175	HLA-DRB1_chr6:32579078_G>-_rs68069105	55	1.48992e-11	HLA-DRB1	rs68069105	chr6	32579078	G	-		HLA-DRB1	ENST00000360004.5	3_prime_UTR_variant	c.*13del		ENST00000360004.5:HLA-DRB1:Q9GIY3:3_prime_UTR_variant::c.*13del		rs13488
TC1175	HLA-DRB1_chr6:32580249_G>C_rs9269744	60	5.95936e-11	HLA-DRB1	rs9269744	chr6	32580249	G	C	Yes	HLA-DRB1	ENST00000360004.5	missense_variant	c.785C>G	p.Thr262Arg	ENST00000360004.5:HLA-DRB1:Q9GIY3:missense_variant:p.Thr262Arg:c.785C>G		rs16871402
TC1175	HLA-DRB1_chr6:32581698_T>C_rs701829	12	-0.00112267	HLA-DRB1	rs701829	chr6	32581698	T	C	Yes	HLA-DRB1	ENST00000360004.5	missense_variant	c.511A>G	p.Met171Val	ENST00000360004.5:HLA-DRB1:Q9GIY3:missense_variant:p.Met171Val:c.511A>G		rs66850812
TC1175	HLA-DRB1_chr6:32581763_C>T_rs1059351	23	-0.000843553	HLA-DRB1	rs1059351	chr6	32581763	C	T	Yes	HLA-DRB1	ENST00000360004.5	missense_variant	c.446G>A	p.Ser149Asn	ENST00000360004.5:HLA-DRB1:Q9GIY3:missense_variant:p.Ser149Asn:c.446G>A		rs9269666
TC1175	HLA-DRB1_chr6:32581834_T>A_rs1071752	25	0.00094373	HLA-DRB1	rs1071752	chr6	32581834	T	A	Yes	HLA-DRB1	ENST00000360004.5	missense_variant	c.375A>T	p.Gln125His	ENST00000360004.5:HLA-DRB1:Q9GIY3:missense_variant:p.Gln125His:c.375A>T		rs9281861
TC1175	HLA-DRB1_chr6:32584162_G>T_rs9269941	38	2.35274e-15	HLA-DRB1	rs9269941	chr6	32584162	G	T	Yes	HLA-DRB1	ENST00000360004.5	missense_variant	c.317C>A	p.Thr106Asn	ENST00000360004.5:HLA-DRB1:Q9GIY3:missense_variant:p.Thr106Asn:c.317C>A		rs141643218
TC1175	HLA-DRB1_chr6:32584171_G>-_rs67476479;rs772090580	30	3.56582e-14	HLA-DRB1	rs67476479;rs772090580	chr6	32584171	G	-	Yes	HLA-DRB1	ENST00000360004.5	frameshift_truncation	c.308del	p.Ala103GlyfsTer26	ENST00000360004.5:HLA-DRB1:Q9GIY3:frameshift_truncation:p.Ala103GlyfsTer26:c.308del		rs1141883
TC1175	HLA-DRB1_chr6:32584178_G>-_rs1554126624	30	3.94416e-14	HLA-DRB1	rs1554126624	chr6	32584178	G	-	Yes	HLA-DRB1	ENST00000360004.5	frameshift_truncation	c.301del	p.Arg101GlyfsTer28	ENST00000360004.5:HLA-DRB1:Q9GIY3:frameshift_truncation:p.Arg101GlyfsTer28:c.301del		rs1060270
TC1175	HLA-DRB1_chr6:32584182_->TT_rs1064592;rs1064592;rs200320734;rs200320734	30	2.58637e-14	HLA-DRB1	rs1064592;rs1064592;rs200320734;rs200320734	chr6	32584182	-	TT	Yes	HLA-DRB1	ENST00000360004.5	frameshift_elongation	c.297_298insAA	p.Ala100LysfsTer30	ENST00000360004.5:HLA-DRB1:Q9GIY3:frameshift_elongation:p.Ala100LysfsTer30:c.297_298insAA		rs34981130
TC1175	HLA-DRB1_chr6:32589775_A>C_rs1059546	58	1.79227e-09	HLA-DRB1	rs1059546	chr6	32589775	A	C		HLA-DRB1	ENST00000360004.5	5_prime_UTR_variant	c.-33T>G		ENST00000360004.5:HLA-DRB1:Q9GIY3:5_prime_UTR_variant::c.-33T>G		rs9281863
TC1238	CCHCR1_chr6:31142614_G>C_rs1576	28	4.37589e-09	CCHCR1	rs1576	chr6	31142614	G	C	Yes	CCHCR1	ENST00000396268.7	missense_variant	c.2594C>G	p.Ser865Cys	ENST00000376266.9:CCHCR1:Q8TD31:missense_variant:p.Ser776Cys:c.2327C>G; ENST00000396263.6:CCHCR1::missense_variant:p.Ser723Cys:c.2168C>G; ENST00000396268.7:CCHCR1:Q8TD31:missense_variant:p.Ser865Cys:c.2594C>G; ENST00000451521.6:CCHCR1:Q8TD31:missense_variant:p.Ser829Cys:c.2486C>G; ENST00000652427.1:CCHCR1::NMD_transcript_variant,3_prime_UTR_variant::c.*1280C>G; ENST00000652535.1:CCHCR1::NMD_trans…		rs1064707
TC1238	CCHCR1_chr6:31144960_C>A_rs130079	24	3.0272e-08	CCHCR1	rs130079	chr6	31144960	C	A	Yes	CCHCR1	ENST00000396268.7	missense_variant	c.1990G>T	p.Gly664Cys	ENST00000376266.9:CCHCR1:Q8TD31:missense_variant:p.Gly575Cys:c.1723G>T; ENST00000396263.6:CCHCR1::missense_variant:p.Gly522Cys:c.1564G>T; ENST00000396268.7:CCHCR1:Q8TD31:missense_variant:p.Gly664Cys:c.1990G>T; ENST00000451521.6:CCHCR1:Q8TD31:missense_variant:p.Gly628Cys:c.1882G>T; ENST00000652427.1:CCHCR1::NMD_transcript_variant,3_prime_UTR_variant::c.*676G>T; ENST00000652535.1:CCHCR1::NMD_transc…		rs1060129
TC1238	CCHCR1_chr6:31148469_G>A_rs130068	55	3.35436e-05	CCHCR1	rs130068	chr6	31148469	G	A	Yes	CCHCR1	ENST00000396268.7	missense_variant	c.1516C>T	p.Arg506Trp	ENST00000376266.9:CCHCR1:Q8TD31:missense_variant:p.Arg417Trp:c.1249C>T; ENST00000396263.6:CCHCR1::missense_variant:p.Arg417Trp:c.1249C>T; ENST00000396268.7:CCHCR1:Q8TD31:missense_variant:p.Arg506Trp:c.1516C>T; ENST00000451521.6:CCHCR1:Q8TD31:missense_variant:p.Arg470Trp:c.1408C>T; ENST00000480060.5:CCHCR1::2kb_downstream_variant,processed_transcript::; ENST00000652427.1:CCHCR1::NMD_transcript_var…		rs753402410
TC1238	CCHCR1_chr6:31150734_T>G_rs130067	32	-0.000277566	CCHCR1	rs130067	chr6	31150734	T	G	Yes	CCHCR1	ENST00000396268.7	missense_variant	c.1092A>C	p.Glu364Asp	ENST00000376266.9:CCHCR1:Q8TD31:missense_variant:p.Glu275Asp:c.825A>C; ENST00000396263.6:CCHCR1::missense_variant:p.Glu275Asp:c.825A>C; ENST00000396268.7:CCHCR1:Q8TD31:missense_variant:p.Glu364Asp:c.1092A>C; ENST00000451521.6:CCHCR1:Q8TD31:missense_variant:p.Glu328Asp:c.984A>C; ENST00000480060.5:CCHCR1::intron_variant,processed_transcript::; ENST00000507459.5:CCHCR1::2kb_downstream_variant,NMD_tr…		rs754848562
TC1238	TCF19_chr6:31161533_C>T_rs7750641	12	2.4569e-05	TCF19	rs7750641	chr6	31161533	C	T	Yes	TCF19	ENST00000376257.8	missense_variant	c.325C>T	p.Pro109Ser	ENST00000376255.4:TCF19:Q9Y242:missense_variant:p.Pro109Ser:c.325C>T; ENST00000376257.8:TCF19:Q9Y242:missense_variant:p.Pro109Ser:c.325C>T; ENST00000496421.1:TCF19::processed_transcript::		rs68069105
TC1238	TCF19_chr6:31161930_C>T_rs2073724	15	0.00139544	TCF19	rs2073724	chr6	31161930	C	T	Yes	TCF19	ENST00000376257.8	missense_variant	c.722C>T	p.Pro241Leu	ENST00000376255.4:TCF19:Q9Y242:missense_variant:p.Pro241Leu:c.722C>T; ENST00000376257.8:TCF19:Q9Y242:missense_variant:p.Pro241Leu:c.722C>T; ENST00000496421.1:TCF19::processed_transcript::		rs9269744
TC1238	TCF19_chr6:31163088_G>A_rs17190776	16	0.00131131	TCF19	rs17190776	chr6	31163088	G	A		TCF19	ENST00000376257.8	3_prime_UTR_variant	c.*371G>A		ENST00000259915.13:POU5F1:Q01860:2kb_downstream_variant::c.*1513C>T; ENST00000376255.4:TCF19:Q9Y242:3_prime_UTR_variant::c.*371G>A; ENST00000376257.8:TCF19:Q9Y242:3_prime_UTR_variant::c.*371G>A; ENST00000441888.7:POU5F1::2kb_downstream_variant::c.*1513C>T; ENST00000471529.6:POU5F1::2kb_downstream_variant::c.*1513C>T; ENST00000496421.1:TCF19::2kb_downstream_variant,processed_transcript::; ENST0000…		rs701829
TC671	GPANK1_chr6:31662176_A>G_rs7029	28	4.3775e-07	GPANK1	rs7029	chr6	31662176	A	G		GPANK1	ENST00000375896.9	3_prime_UTR_variant	c.*90T>C		ENST00000364337.1:AL662899.1::2kb_upstream_variant,misc_RNA::; ENST00000375893.6:GPANK1:O95872:3_prime_UTR_variant::c.*90T>C; ENST00000375895.6:GPANK1:O95872:3_prime_UTR_variant::c.*90T>C; ENST00000375896.9:GPANK1:O95872:3_prime_UTR_variant::c.*90T>C; ENST00000375900.8:GPANK1:O95872:3_prime_UTR_variant::c.*90T>C; ENST00000375906.5:GPANK1:O95872:3_prime_UTR_variant::c.*90T>C; ENST00000375911.2:C6o…		rs1059351
TC671	GPANK1_chr6:31664357_C>A_rs3130618	39	1.22396e-09	GPANK1	rs3130618	chr6	31664357	C	A	Yes	GPANK1	ENST00000375896.9	missense_variant	c.122G>T	p.Arg41Leu	ENST00000364337.1:AL662899.1::2kb_downstream_variant,misc_RNA::; ENST00000375865.6:CSNK2B:P67870:2kb_upstream_variant::c.-2051C>A; ENST00000375866.2:CSNK2B:P67870:2kb_upstream_variant::c.-2142C>A; ENST00000375880.6:AL662899.4::2kb_upstream_variant::c.-1863C>A; ENST00000375882.6:CSNK2B:P67870:2kb_upstream_variant::c.-1863C>A; ENST00000375885.8:CSNK2B::2kb_upstream_variant::c.-1091C>A; ENST00000375…		rs1071752
TC671	GPANK1_chr6:31664909_C>T_rs2295665	24	4.60858e-05	GPANK1	rs2295665	chr6	31664909	C	T		GPANK1	ENST00000375896.9	5_prime_UTR_variant	c.-168G>A		ENST00000364337.1:AL662899.1::2kb_downstream_variant,misc_RNA::; ENST00000375865.6:CSNK2B:P67870:2kb_upstream_variant::c.-1499C>T; ENST00000375866.2:CSNK2B:P67870:2kb_upstream_variant::c.-1590C>T; ENST00000375880.6:AL662899.4::2kb_upstream_variant::c.-1311C>T; ENST00000375882.6:CSNK2B:P67870:2kb_upstream_variant::c.-1311C>T; ENST00000375885.8:CSNK2B::2kb_upstream_variant::c.-539C>T; ENST000003758…		rs9269941
TC671	PRRC2A_chr6:31627996_CCTGCTGCCCCA>-_rs149965706	23	0.000762443	PRRC2A	rs149965706	chr6	31627996	CCTGCTGCCCCA	-	Yes	PRRC2A	ENST00000376033.3	inframe_deletion	c.1533_1544del	p.Pro512_Pro515del	ENST00000376007.8:PRRC2A:P48634:inframe_deletion:p.Pro512_Pro515del:c.1533_1544del; ENST00000376033.3:PRRC2A:P48634:inframe_deletion:p.Pro512_Pro515del:c.1533_1544del; ENST00000469577.5:PRRC2A::2kb_downstream_variant,processed_transcript::		rs67476479;rs772090580
TC671	PRRC2A_chr6:31634066_T>C_rs3115663	28	0.00310963	PRRC2A	rs3115663	chr6	31634066	T	C		PRRC2A	ENST00000376033.3	intron_variant	c.4719+77T>C		ENST00000376007.8:PRRC2A:P48634:intron_variant::c.4719+77T>C; ENST00000376033.3:PRRC2A:P48634:intron_variant::c.4719+77T>C; ENST00000616110.1:MIR6832::2kb_downstream_variant,miRNA::		rs1554126624
TC671	PRRC2A_chr6:31634712_T>C_rs2242657	16	6.31487e-05	PRRC2A	rs2242657	chr6	31634712	T	C		PRRC2A	ENST00000376033.3	intron_variant	c.4936-41T>C		ENST00000376007.8:PRRC2A:P48634:intron_variant::c.4936-41T>C; ENST00000376033.3:PRRC2A:P48634:intron_variant::c.4936-41T>C; ENST00000616110.1:MIR6832::2kb_downstream_variant,miRNA::		rs1064592;rs1064592;rs200320734;rs200320734
TC671	PRRC2A_chr6:31635190_G>A_rs1046089	70	3.72175e-20	PRRC2A	rs1046089	chr6	31635190	G	A	Yes	PRRC2A	ENST00000376033.3	missense_variant	c.5219G>A	p.Arg1740His	ENST00000376007.8:PRRC2A:P48634:missense_variant:p.Arg1740His:c.5219G>A; ENST00000376033.3:PRRC2A:P48634:missense_variant:p.Arg1740His:c.5219G>A; ENST00000616110.1:MIR6832::2kb_downstream_variant,miRNA::		rs1059546
TC671	PRRC2A_chr6:31636814_C>T_rs10885	47	2.29228e-09	PRRC2A	rs10885	chr6	31636814	C	T	Yes	PRRC2A	ENST00000376033.3	missense_variant	c.6016C>T	p.Pro2006Ser	ENST00000376007.8:PRRC2A:P48634:missense_variant:p.Pro2006Ser:c.6016C>T; ENST00000376033.3:PRRC2A:P48634:missense_variant:p.Pro2006Ser:c.6016C>T		rs2256965
TC671	PRRC2A_chr6:31637422_G>C_rs2736155	75	-0.00216709	PRRC2A	rs2736155	chr6	31637422	G	C		PRRC2A	ENST00000376033.3	intron_variant	c.6334-24G>C		ENST00000211379.9:BAG6:P46379:2kb_downstream_variant::c.*1709C>G; ENST00000362049.10:BAG6:P46379:2kb_downstream_variant::c.*1709C>G; ENST00000375964.10:BAG6:P46379:2kb_downstream_variant::c.*1709C>G; ENST00000375976.8:BAG6:P46379:2kb_downstream_variant::c.*1709C>G; ENST00000376007.8:PRRC2A:P48634:intron_variant::c.6334-24G>C; ENST00000376033.3:PRRC2A:P48634:intron_variant::c.6334-24G>C; ENST00000…		rs2256974
TC865	ATP6V1G2_chr6:31544943_G>C_rs2071594	38	1.04763e-11	ATP6V1G2	rs2071594	chr6	31544943	G	C		ATP6V1G2	ENST00000303892.9	3_prime_UTR_variant	c.*465C>G		ENST00000303892.9:ATP6V1G2:O95670:3_prime_UTR_variant::c.*465C>G; ENST00000376146.8:NFKBIL1::2kb_upstream_variant::c.-2043G>C; ENST00000376151.4:ATP6V1G2:O95670:3_prime_UTR_variant::c.*465C>G; ENST00000376185.5:ATP6V1G2-DDX39B::intron_variant,NMD_transcript_variant::c.183+1166C>G; ENST00000416684.1:DDX39B-AS1::2kb_downstream_variant,lnc_RNA::; ENST00000420520.1:DDX39B-AS1::2kb_downstream_variant,…		rs9279359
TC865	DDX39B_chr6:31530468_->C_rs9281523	14	0.000200417	DDX39B	rs9281523	chr6	31530468	-	C		DDX39B	ENST00000396172.6	intron_variant	c.1271-18dup		ENST00000376177.6:DDX39B::intron_variant::c.*16-18dup; ENST00000376185.5:ATP6V1G2-DDX39B::intron_variant,NMD_transcript_variant::c.*1485-18dup; ENST00000376191.3:MCCD1:P59942:2kb_downstream_variant::c.*533dup; ENST00000396172.6:DDX39B:Q13838:intron_variant::c.1271-18dup; ENST00000458640.5:DDX39B:Q13838:intron_variant::c.1271-18dup; ENST00000462421.1:DDX39B::processed_transcript::		rs1800683
TC865	DDX39B_chr6:31533232_G>C_rs77689490	20	0.000830986	DDX39B	rs77689490	chr6	31533232	G	C		DDX39B	ENST00000396172.6	intron_variant	c.736-321C>G		ENST00000376177.6:DDX39B::intron_variant::c.736-321C>G; ENST00000376185.5:ATP6V1G2-DDX39B::intron_variant,NMD_transcript_variant::c.*950-321C>G; ENST00000396172.6:DDX39B:Q13838:intron_variant::c.736-321C>G; ENST00000458640.5:DDX39B:Q13838:intron_variant::c.736-321C>G		rs2239704
TC865	DDX39B_chr6:31533435_A>T_rs11796	79	1.51587e-20	DDX39B	rs11796	chr6	31533435	A	T		DDX39B	ENST00000396172.6	intron_variant	c.736-524T>A		ENST00000376177.6:DDX39B::intron_variant::c.736-524T>A; ENST00000376185.5:ATP6V1G2-DDX39B::intron_variant,NMD_transcript_variant::c.*950-524T>A; ENST00000396172.6:DDX39B:Q13838:intron_variant::c.736-524T>A; ENST00000458640.5:DDX39B:Q13838:intron_variant::c.736-524T>A		rs2229092
TC865	DDX39B_chr6:31533781_C>T_rs1055384	34	7.04154e-05	DDX39B	rs1055384	chr6	31533781	C	T		DDX39B	ENST00000396172.6	intron_variant	c.736-870G>A		ENST00000376177.6:DDX39B::intron_variant::c.736-870G>A; ENST00000376185.5:ATP6V1G2-DDX39B::intron_variant,NMD_transcript_variant::c.*950-870G>A; ENST00000396172.6:DDX39B:Q13838:intron_variant::c.736-870G>A; ENST00000458640.5:DDX39B:Q13838:intron_variant::c.736-870G>A		rs1041981
TC865	DDX39B_chr6:31535106_TGT>-_rs3830668	10	0.000259241	DDX39B	rs3830668	chr6	31535106	TGT	-		DDX39B	ENST00000396172.6	intron_variant	c.735+259_735+261del		ENST00000364915.1:SNORD117::2kb_downstream_variant,snoRNA::; ENST00000376177.6:DDX39B::intron_variant::c.735+259_735+261del; ENST00000376185.5:ATP6V1G2-DDX39B::NMD_transcript_variant,3_prime_UTR_variant::c.*949+259_*949+261del; ENST00000396172.6:DDX39B:Q13838:intron_variant::c.735+259_735+261del; ENST00000458640.5:DDX39B:Q13838:intron_variant::c.735+259_735+261del		rs9262143
TC865	DDX39B_chr6:31540676_A>-_rs34788230	60	3.26352e-06	DDX39B	rs34788230	chr6	31540676	A	-		DDX39B	ENST00000396172.6	5_prime_UTR_variant	c.-132-12del		ENST00000376177.6:DDX39B::2kb_upstream_variant::c.-144del; ENST00000376185.5:ATP6V1G2-DDX39B::NMD_transcript_variant,3_prime_UTR_variant::c.*83-12del; ENST00000396172.6:DDX39B:Q13838:5_prime_UTR_variant::c.-132-12del; ENST00000416684.1:DDX39B-AS1::2kb_upstream_variant,lnc_RNA::; ENST00000420520.1:DDX39B-AS1::2kb_upstream_variant,lnc_RNA::; ENST00000458640.5:DDX39B:Q13838:5_prime_UTR_variant::c.-2…		rs149965706
TC865	DDX39B_chr6:31542002_C>G_rs2239527	28	0.000130985	DDX39B	rs2239527	chr6	31542002	C	G		DDX39B	ENST00000396172.6	5_prime_UTR_variant	c.-185G>C		ENST00000376177.6:DDX39B::2kb_upstream_variant::c.-1470G>C; ENST00000376185.5:ATP6V1G2-DDX39B::NMD_transcript_variant,3_prime_UTR_variant::c.*30G>C; ENST00000396172.6:DDX39B:Q13838:5_prime_UTR_variant::c.-185G>C; ENST00000416684.1:DDX39B-AS1::2kb_upstream_variant,lnc_RNA::; ENST00000420520.1:DDX39B-AS1::2kb_upstream_variant,lnc_RNA::; ENST00000458640.5:DDX39B:Q13838:5_prime_UTR_variant::c.-55G>C;…		rs3115663
TC865	LST1_chr6:31587353_A>G_rs2256965	107	0.00109889	LST1	rs2256965	chr6	31587353	A	G		LST1	ENST00000438075.6	intron_variant	c.19+35A>G		ENST00000211921.11:LST1::intron_variant::c.19+35A>G; ENST00000303757.12:LST1::intron_variant::c.19+35A>G; ENST00000339530.8:LST1::intron_variant::c.19+35A>G; ENST00000340027.10:NCR3:O14931:2kb_downstream_variant::c.*1714T>C; ENST00000376071.4:NCR3:O14931:2kb_downstream_variant::c.*1959T>C; ENST00000376072.7:NCR3:O14931:2kb_downstream_variant::c.*1959T>C; ENST00000376073.8:NCR3:O14931:2kb_downstre…		rs2242657
TC865	LST1_chr6:31587615_C>A_rs2256974	47	1.72403e-06	LST1	rs2256974	chr6	31587615	C	A		LST1	ENST00000438075.6	intron_variant	c.20-26C>A		ENST00000211921.11:LST1::intron_variant::c.19+297C>A; ENST00000303757.12:LST1::intron_variant::c.20-26C>A; ENST00000339530.8:LST1::intron_variant::c.20-26C>A; ENST00000340027.10:NCR3:O14931:2kb_downstream_variant::c.*1452G>T; ENST00000376071.4:NCR3:O14931:2kb_downstream_variant::c.*1697G>T; ENST00000376072.7:NCR3:O14931:2kb_downstream_variant::c.*1697G>T; ENST00000376073.8:NCR3:O14931:2kb_downstr…		rs1046089
TC865	LST1_chr6:31588375_AGAG>-_rs9279359	31	7.6034e-06	LST1	rs9279359	chr6	31588375	AGAG	-		LST1	ENST00000438075.6	intron_variant	c.136-119_136-116del		ENST00000211921.11:LST1::intron_variant::c.20-119_20-116del; ENST00000303757.12:LST1::intron_variant::c.113-119_113-116del; ENST00000339530.8:LST1::intron_variant::c.113-98_113-95del; ENST00000340027.10:NCR3:O14931:2kb_downstream_variant::c.*689_*692del; ENST00000376071.4:NCR3:O14931:2kb_downstream_variant::c.*934_*937del; ENST00000376072.7:NCR3:O14931:2kb_downstream_variant::c.*934_*937del; ENST…		rs10885
TC865	LTA_chr6:31572294_G>A_rs1800683	23	2.76728e-09	LTA	rs1800683	chr6	31572294	G	A		LTA	ENST00000418386.2	5_prime_UTR_variant	c.-162G>A		ENST00000418386.2:LTA:P01374:5_prime_UTR_variant::c.-162G>A; ENST00000454783.5:LTA:P01374:5_prime_UTR_variant::c.-18G>A		rs2736155
TC865	LTA_chr6:31572364_A>C_rs2239704	60	2.82438e-05	LTA	rs2239704	chr6	31572364	A	C		LTA	ENST00000418386.2	5_prime_UTR_variant	c.-92A>C		ENST00000418386.2:LTA:P01374:5_prime_UTR_variant::c.-92A>C; ENST00000454783.5:LTA:P01374:intron_variant::c.-10+62A>C		rs7750641
TC865	LTA_chr6:31572980_A>C_rs2229092	10	-0.000926106	LTA	rs2229092	chr6	31572980	A	C	Yes	LTA	ENST00000418386.2	missense_variant	c.152A>C	p.His51Pro	ENST00000418386.2:LTA:P01374:missense_variant:p.His51Pro:c.152A>C; ENST00000454783.5:LTA:P01374:missense_variant:p.His51Pro:c.152A>C		rs2073724
TC865	LTA_chr6:31573007_C>A_rs1041981	47	4.53565e-20	LTA	rs1041981	chr6	31573007	C	A	Yes	LTA	ENST00000418386.2	missense_variant	c.179C>A	p.Thr60Asn	ENST00000418386.2:LTA:P01374:missense_variant:p.Thr60Asn:c.179C>A; ENST00000454783.5:LTA:P01374:missense_variant:p.Thr60Asn:c.179C>A		rs17190776

## Sheet: HLA per sample (SF4)
	A1	A2	B1	B2	C1	C2	DPB11	DPB12	DQA11	DQA12	DQB11	DQB12	DRB11	DRB12
PRIMERO_064	A*01:01P	A*32:01P	B*18:01P	B*40:02P	C*02:02P	C*05:01P	DPB1*04:01P	DPB1*03:01P	DQA1*05:01P	DQA1*05:01P	DQB1*02:01P	DQB1*03:01P	DRB1*03:01P	DRB1*11:01P
PRIMERO_032	A*26:01P	A*68:01P	B*35:01P	B*27:05P	C*02:02P	C*04:01P	DPB1*02:01P	DPB1*04:01P	DQA1*01:02P	DQA1*03:01P	DQB1*06:02P	DQB1*03:02P	DRB1*04:04P	DRB1*15:01P
PRIMERO_010	A*02:05P	A*68:02P	B*53:01P	B*58:01P	C*07:01P	C*04:01P	DPB1*04:02P	DPB1*04:01P	DQA1*01:02P	DQA1*01:02P	DQB1*06:04P	DQB1*06:118P	DRB1*13:02P	DRB1*13:02P
PRIMERO_082	A*01:01P	A*32:01P	B*14:01P	B*08:01P	C*07:01P	C*08:02P	DPB1*01:01P	DPB1*04:01P	DQA1*02:01P	DQA1*02:01P	DQB1*02:01P	DQB1*02:01P	DRB1*03:01P	DRB1*07:01P
PRIMERO_105	A*01:01P	A*01:01P	B*57:01P	B*08:01P	C*07:01P	C*06:02P	DPB1*04:01P	DPB1*04:01P	DQA1*02:01P	DQA1*05:01P	DQB1*02:01P	DQB1*02:01P	DRB1*03:01P	DRB1*07:01P
PRIMERO_022	A*02:01P	A*01:01P	B*08:01P	B*40:01P	C*07:01P	C*03:04P	DPB1*04:01P	DPB1*04:01P	DQA1*05:01P	DQA1*01:02P	DQB1*06:04P	DQB1*06:118P	DRB1*03:01P	DRB1*13:02P
PRIMERO_035	A*01:01P	A*03:01P	B*08:01P	B*27:05P	C*07:01P	C*01:02P	DPB1*04:01P	DPB1*04:01P	DQA1*05:01P	DQA1*01:01P	DQB1*05:01P	DQB1*02:01P	DRB1*01:01P	DRB1*03:01P
PRIMERO_110	A*02:01P	A*24:02P	B*57:01P	B*44:02P	C*06:02P	C*05:01P	DPB1*20:01P	DPB1*13:01P	DQA1*02:01P	DQA1*03:01P	DQB1*03:01P	DQB1*03:03P	DRB1*04:01P	DRB1*07:01P
PRIMERO_003	A*68:01P	A*29:02P	B*44:02P	B*44:03P	C*16:01P	C*05:01P	DPB1*04:01P	DPB1*02:01P	DQA1*02:01P	DQA1*02:01P	DQB1*03:03P	DQB1*03:03P	DRB1*07:01P	DRB1*07:01P
PRIMERO_134	A*03:01P	A*03:01P	B*47:01P	B*39:06P	C*07:02P	C*06:02P	DPB1*15:01P	DPB1*15:01P	DQA1*01:03P	DQA1*03:01P	DQB1*06:03P	DQB1*03:01P	DRB1*04:01P	DRB1*13:01P
PRIMERO_073	A*01:01P	A*01:01P	B*08:01P	B*08:01P	C*07:01P	C*07:01P	DPB1*01:01P	DPB1*03:01P	DQA1*05:01P	DQA1*05:01P	DQB1*02:01P	DQB1*03:01P	DRB1*03:01P	DRB1*11:01P
PRIMERO_012	A*30:02P	A*24:02P	B*07:02P	B*41:02P	C*17:01P	C*07:02P	DPB1*02:01P	DPB1*02:01P	DQA1*01:01P	DQA1*01:01P	DQB1*05:01P	DQB1*05:03P	DRB1*01:01P	DRB1*14:01P
PRIMERO_054	A*03:01P	A*02:01P	B*07:02P	B*15:01P	C*07:02P	C*03:04P	DPB1*04:01P	DPB1*04:02P	DQA1*01:01P	DQA1*05:01P	DQB1*05:01P	DQB1*05:01P	DRB1*01:01P	DRB1*11:01P
PRIMERO_052	A*01:01P	A*03:01P	B*07:02P	B*08:01P	C*07:01P	C*07:02P	DPB1*05:01P	DPB1*04:02P	DQA1*01:03P	DQA1*05:01P	DQB1*06:03P	DQB1*06:03P	DRB1*03:01P	DRB1*13:01P
PRIMERO_007	A*03:01P	A*02:01P	B*15:01P	B*35:01P	C*04:01P	C*03:03P	DPB1*04:01P	DPB1*04:02P	DQA1*05:01P	DQA1*01:01P	DQB1*05:01P	DQB1*03:01P	DRB1*01:01P	DRB1*13:03P
PRIMERO_029	A*23:01P	A*02:01P	B*07:02P	B*15:01P	C*03:04P	C*07:02P	DPB1*04:01P	DPB1*04:02P	DQA1*03:01P	DQA1*01:02P	DQB1*06:02P	DQB1*03:02P	DRB1*04:01P	DRB1*15:01P
PRIMERO_051	A*25:01P	A*24:02P	B*07:02P	B*40:01P	C*03:04P	C*07:02P	DPB1*02:01P	DPB1*04:01P	DQA1*01:02P	DQA1*01:01P	DQB1*06:02P	DQB1*05:01P	DRB1*01:01P	DRB1*15:01P
PRIMERO_056	A*02:01P	A*02:01P	B*41:01P	B*07:02P	C*17:01P	C*07:02P	DPB1*14:01P	DPB1*04:01P	DQA1*01:02P	DQA1*02:01P	DQB1*06:02P	DQB1*03:03P	DRB1*07:01P	DRB1*15:01P
PRIMERO_023	A*03:01P	A*02:01P	B*40:01P	B*15:01P	C*03:04P	C*03:04P	DPB1*04:01P	DPB1*04:01P	DQA1*01:01P	DQA1*01:02P	DQB1*06:04P	DQB1*05:01P	DRB1*01:01P	DRB1*13:02P
PRIMERO_144	A*01:01P	A*68:02P	B*51:01P	B*41:01P	C*17:01P	C*15:02P	DPB1*01:01P	DPB1*14:01P	DQA1*05:01P	DQA1*05:01P	DQB1*02:01P	DQB1*03:01P	DRB1*03:01P	DRB1*11:01P
PRIMERO_103	A*02:01P	A*68:01P	B*55:01P	B*57:01P	C*06:02P	C*03:03P	DPB1*04:01P	DPB1*04:01P	DQA1*01:01P	DQA1*02:01P	DQB1*05:03P	DQB1*03:03P	DRB1*07:01P	DRB1*14:01P
PRIMERO_132	A*02:01P	A*02:01P	B*07:02P	B*44:02P	C*07:02P	C*05:01P	DPB1*04:01P	DPB1*05:01P	DQA1*01:02P	DQA1*01:02P	DQB1*06:02P	DQB1*06:02P	DRB1*15:01P	DRB1*15:01P
PRIMERO_080	A*02:01P	A*02:01P	B*07:02P	B*44:02P	C*07:02P	C*07:04P	DPB1*04:01P	DPB1*04:01P	DQA1*01:02P	DQA1*01:02P	DQB1*06:02P	DQB1*06:02P	DRB1*15:01P	DRB1*15:01P
PRIMERO_048	A*30:01P	A*02:01P	B*44:02P	B*15:01P	C*07:04P	C*03:03P	DPB1*19:01P	DPB1*02:01P	DQA1*01:03P	DQA1*01:03P	DQB1*06:03P	DQB1*06:03P	DRB1*11:01P	DRB1*13:01P
PRIMERO_038	A*26:01P	A*11:01P	B*35:01P	B*57:01P	C*04:01P	C*06:02P	DPB1*19:01P	DPB1*02:01P	DQA1*02:01P	DQA1*01:01P	DQB1*05:01P	DQB1*03:03P	DRB1*01:01P	DRB1*07:01P
PRIMERO_041	A*11:01P	A*01:01P	B*35:01P	B*08:01P	C*07:01P	C*04:01P	DPB1*10:01P	DPB1*02:01P	DQA1*03:01P	DQA1*03:01P	DQB1*02:01P	DQB1*03:01P	DRB1*03:01P	DRB1*04:07P
PRIMERO_015	A*02:01P	A*02:01P	B*08:01P	B*15:01P	C*07:01P	C*03:04P	DPB1*04:01P	DPB1*04:01P	DQA1*03:01P	DQA1*03:01P	DQB1*02:01P	DQB1*03:02P	DRB1*03:01P	DRB1*04:01P
PRIMERO_101	A*25:01P	A*24:02P	B*07:02P	B*40:01P	C*07:02P	C*03:04P	DPB1*02:01P	DPB1*04:01P	DQA1*01:02P	DQA1*01:01P	DQB1*05:01P	DQB1*06:02P	DRB1*01:01P	DRB1*15:01P
PRIMERO_133	A*24:02P	A*02:01P	B*13:02P	B*18:01P	C*05:01P	C*06:02P	DPB1*02:02P	DPB1*04:01P	DQA1*02:01P	DQA1*05:01P	DQB1*02:01P	DQB1*02:01P	DRB1*03:01P	DRB1*07:01P
PRIMERO_078	A*29:02P	A*02:01P	B*44:02P	B*44:03P	C*16:01P	C*05:01P	DPB1*11:01P	DPB1*04:01P	DQA1*02:01P	DQA1*03:01P	DQB1*02:01P	DQB1*03:01P	DRB1*04:01P	DRB1*07:01P
PRIMERO_005	A*01:01P	A*02:01P	B*08:01P	B*15:01P	C*07:01P	C*03:04P	DPB1*04:01P	DPB1*03:01P	DQA1*03:01P	DQA1*03:01P	DQB1*02:01P	DQB1*03:01P	DRB1*03:01P	DRB1*04:01P
PRIMERO_113	A*26:01P	A*02:01P	B*39:01P	B*15:01P	C*07:02P	C*03:04P	DPB1*04:01P	DPB1*04:01P	DQA1*01:02P	DQA1*03:01P	DQB1*06:02P	DQB1*03:02P	DRB1*04:01P	DRB1*15:01P
PRIMERO_063	A*30:02P	A*02:01P	B*18:01P	B*08:01P	C*07:01P	C*05:01P	DPB1*02:02P	DPB1*04:02P	DQA1*01:02P	DQA1*05:01P	DQB1*06:02P	DQB1*06:02P	DRB1*03:01P	DRB1*15:01P
PRIMERO_033	A*03:01P	A*32:01P	B*40:01P	B*18:01P	C*03:04P	C*07:01P	DPB1*04:01P	DPB1*04:01P	DQA1*03:01P	DQA1*02:01P	DQB1*02:12	DQB1*03:02P	DRB1*04:03P	DRB1*07:01P
PRIMERO_140	A*11:01P	A*02:01P	B*15:01P	B*15:01P	C*03:03P	C*03:04P	DPB1*02:01P	DPB1*02:01P	DQA1*01:03P	DQA1*03:01P	DQB1*06:03P	DQB1*03:02P	DRB1*04:01P	DRB1*13:01P
PRIMERO_001	A*32:01P	A*03:01P	B*51:01P	B*07:02P	C*07:02P	C*15:02P	DPB1*02:01P	DPB1*02:01P	DQA1*01:02P	DQA1*01:03P	DQB1*06:04P	DQB1*06:03P	DRB1*13:01P	DRB1*13:02P
PRIMERO_093	A*01:01P	A*02:01P	B*08:01P	B*44:02P	C*07:01P	C*07:04P	DPB1*04:01P	DPB1*04:01P	DQA1*01:02P	DQA1*01:02P	DQB1*05:02P	DQB1*05:02P	DRB1*03:01P	DRB1*16:01P
PRIMERO_120	A*03:01P	A*68:01P	B*07:02P	B*51:01P	C*04:01P	C*07:02P	DPB1*04:01P	DPB1*20:01P	DQA1*04:01P	DQA1*01:01P	DQB1*05:01P	DQB1*04:02P	DRB1*01:01P	DRB1*08:01P
PRIMERO_045	A*31:01P	A*24:02P	B*57:01P	B*40:01P	C*03:04P	C*06:02P	DPB1*04:01P	DPB1*04:01P	DQA1*02:01P	DQA1*03:01P	DQB1*03:02P	DQB1*03:03P	DRB1*04:04P	DRB1*07:01P
PRIMERO_046	A*31:01P	A*03:01P	B*51:01P	B*07:02P	C*07:02P	C*04:01P	DPB1*20:01P	DPB1*03:01P	DQA1*05:01P	DQA1*01:01P	DQB1*02:01P	DQB1*05:01P	DRB1*01:01P	DRB1*03:01P
PRIMERO_092	A*03:01P	A*26:01P	B*47:01P	B*07:02P	C*07:02P	C*06:02P	DPB1*04:01P	DPB1*02:01P	DQA1*01:02P	DQA1*01:02P	DQB1*06:113	DQB1*06:02P	DRB1*15:01P	DRB1*15:01P
PRIMERO_141	A*24:02P	A*11:01P	B*08:01P	B*40:01P	C*07:01P	C*07:02P	DPB1*04:02P	DPB1*04:01P	DQA1*03:01P	DQA1*03:01P	DQB1*03:01P	DQB1*03:01P	DRB1*03:01P	DRB1*04:01P
PRIMERO_107	A*01:01P	A*02:01P	B*08:01P	B*41:01P	C*17:01P	C*07:01P	DPB1*01:01P	DPB1*14:01P	DQA1*02:01P	DQA1*05:01P	DQB1*02:53Q	DQB1*03:03P	DRB1*03:01P	DRB1*07:01P
PRIMERO_042	A*02:01P	A*02:01P	B*13:02P	B*40:01P	C*03:04P	C*06:02P	DPB1*04:01P	DPB1*04:01P	DQA1*02:01P	DQA1*03:01P	DQB1*02:01P	DQB1*03:01P	DRB1*04:07P	DRB1*07:01P
PRIMERO_102	A*11:01P	A*01:01P	B*39:01P	B*15:01P	C*04:01P	C*07:02P	DPB1*02:01P	DPB1*03:01P	DQA1*01:02P	DQA1*01:03P	DQB1*06:02P	DQB1*06:03P	DRB1*13:01P	DRB1*15:01P
PRIMERO_018	A*02:01P	A*02:01P	B*73:01P	B*07:02P	C*15:05P	C*07:02P	DPB1*03:01P	DPB1*06:01P	DQA1*03:01P	DQA1*03:01P	DQB1*02:01P	DQB1*03:02P	DRB1*04:04P	DRB1*04:05P
PRIMERO_118	A*29:02P	A*02:01P	B*44:03P	B*27:05P	C*16:01P	C*01:02P	DPB1*04:01P	DPB1*04:01P	DQA1*02:01P	DQA1*01:01P	DQB1*02:01P	DQB1*05:01P	DRB1*01:01P	DRB1*07:01P
PRIMERO_086	A*02:01P	A*02:01P	B*57:01P	B*44:03P	C*04:01P	C*06:02P	DPB1*04:01P	DPB1*13:01P	DQA1*02:01P	DQA1*02:01P	DQB1*03:03P	DQB1*03:03P	DRB1*07:01P	DRB1*07:01P
PRIMERO_044	A*31:01P	A*03:01P	B*39:01P	B*56:01P	C*07:02P	C*01:02P	DPB1*04:01P	DPB1*04:01P	DQA1*03:01P	DQA1*01:02P	DQB1*06:02P	DQB1*03:02P	DRB1*04:01P	DRB1*15:01P
PRIMERO_104	A*68:01P	A*03:01P	B*07:02P	B*40:01P	C*07:02P	C*03:04P	DPB1*01:01P	DPB1*10:01P	DQA1*01:02P	DQA1*05:01P	DQB1*06:02P	DQB1*06:02P	DRB1*03:01P	DRB1*15:01P
PRIMERO_138	A*24:02P	A*03:01P	B*14:02P	B*18:01P	C*07:01P	C*08:02P	DPB1*04:02P	DPB1*04:02P	DQA1*05:01P	DQA1*05:01P	DQB1*03:01P	DQB1*03:01P	DRB1*01:03P	DRB1*11:04P
PRIMERO_067	A*03:01P	A*02:01P	B*55:01P	B*07:02P	C*07:02P	C*01:02P	DPB1*04:01P	DPB1*04:01P	DQA1*01:02P	DQA1*03:01P	DQB1*06:02P	DQB1*03:276N	DRB1*04:01P	DRB1*15:01P
PRIMERO_006	A*02:01P	A*02:01P	B*35:03P	B*51:01P	C*04:01P	C*05:01P	DPB1*03:01P	DPB1*04:01P	DQA1*01:02P	DQA1*05:01P	DQB1*06:02P	DQB1*03:276N	DRB1*15:01P	DRB1*12:01P
PRIMERO_050	A*02:01P	A*02:01P	B*15:01P	B*51:01P	C*01:02P	C*03:03P	DPB1*19:01P	DPB1*04:01P	DQA1*01:03P	DQA1*01:01P	DQB1*05:03P	DQB1*06:03P	DRB1*13:01P	DRB1*14:01P
PRIMERO_099	A*01:01P	A*01:01P	B*08:01P	B*15:01P	C*03:04P	C*07:01P	DPB1*04:01P	DPB1*04:02P	DQA1*03:01P	DQA1*01:02P	DQB1*06:118P	DQB1*03:02P	DRB1*04:01P	DRB1*13:02P
PRIMERO_142	A*11:01P	A*24:02P	B*07:02P	B*40:02P	C*07:02P	C*02:02P	DPB1*04:02P	DPB1*04:02P	DQA1*01:02P	DQA1*01:03P	DQB1*06:02P	DQB1*06:03P	DRB1*13:01P	DRB1*15:01P
PRIMERO_126	A*01:01P	A*26:01P	B*55:01P	B*35:03P	C*03:03P	C*12:03P	DPB1*81:01P	DPB1*04:01P	DQA1*01:01P	DQA1*01:02P	DQB1*05:01P	DQB1*05:02P	DRB1*01:01P	DRB1*16:01P
PRIMERO_040	A*01:01P	A*68:01P	B*08:01P	B*35:03P	C*04:01P	C*07:01P	DPB1*04:01P	DPB1*04:02P	DQA1*02:01P	DQA1*05:01P	DQB1*02:01P	DQB1*02:01P	DRB1*03:01P	DRB1*07:01P
PRIMERO_135	A*02:01P	A*68:01P	B*40:01P	B*15:01P	C*03:04P	C*03:04P	DPB1*04:01P	DPB1*04:01P	DQA1*01:02P	DQA1*03:01P	DQB1*06:04P	DQB1*03:02P	DRB1*04:01P	DRB1*13:02P
PRIMERO_088	A*03:01P	A*68:01P	B*35:01P	B*50:01P	C*06:02P	C*04:01P	DPB1*04:02P	DPB1*04:01P	DQA1*02:01P	DQA1*03:01P	DQB1*02:01P	DQB1*03:02P	DRB1*04:01P	DRB1*07:01P
PRIMERO_106	A*02:01P	A*26:01P	B*39:01P	B*15:01P	C*04:01P	C*12:03P	DPB1*10:01P	DPB1*04:01P	DQA1*03:01P	DQA1*01:02P	DQB1*05:02P	DQB1*03:02P	DRB1*04:01P	DRB1*16:01P
PRIMERO_028	A*66:01P	A*03:01P	B*07:02P	B*49:01P	C*07:01P	C*07:02P	DPB1*03:01P	DPB1*04:01P	DQA1*02:01P	DQA1*05:01P	DQB1*03:02P	DQB1*03:01P	DRB1*07:01P	DRB1*11:02P
PRIMERO_062	A*11:01P	A*03:01P	B*35:01P	B*35:01P	C*04:01P	C*04:01P	DPB1*02:01P	DPB1*04:01P	DQA1*03:01P	DQA1*03:01P	DQB1*03:01P	DQB1*03:01P	DRB1*04:07P	DRB1*11:01P
PRIMERO_019	A*02:01P	A*02:01P	B*27:05P	B*44:02P	C*05:01P	C*02:02P	DPB1*04:01P	DPB1*04:02P	DQA1*01:01P	DQA1*05:01P	DQB1*05:01P	DQB1*03:01P	DRB1*01:01P	DRB1*11:01P
PRIMERO_037	A*24:02P	A*01:01P	B*08:01P	B*44:02P	C*07:01P	C*05:01P	DPB1*04:02P	DPB1*02:01P	DQA1*01:03P	DQA1*05:01P	DQB1*06:03P	DQB1*06:03P	DRB1*03:01P	DRB1*13:01P
PRIMERO_131	A*24:02P	A*02:01P	B*51:01P	B*41:01P	C*17:01P	C*15:02P	DPB1*03:01P	DPB1*14:01P	DQA1*02:01P	DQA1*05:01P	DQB1*03:01P	DQB1*03:03P	DRB1*07:01P	DRB1*11:03P
PRIMERO_024	A*24:02P	A*02:01P	B*35:01P	B*27:05P	C*04:01P	C*01:02P	DPB1*02:01P	DPB1*03:01P	DQA1*03:01P	DQA1*01:01P	DQB1*03:02P	DQB1*05:01P	DRB1*01:01P	DRB1*04:04P
PRIMERO_090	A*02:01P	A*68:01P	B*08:01P	B*35:01P	C*07:01P	C*04:01P	DPB1*04:01P	DPB1*04:02P	DQA1*01:01P	DQA1*01:01P	DQB1*02:01P	DQB1*05:01P	DRB1*01:01P	DRB1*03:01P
PRIMERO_083	A*24:02P	A*24:02P	B*15:24P	B*07:02P	C*07:02P	C*03:03P	DPB1*04:01P	DPB1*04:01P	DQA1*01:02P	DQA1*03:01P	DQB1*03:02P	DQB1*06:02P	DRB1*04:01P	DRB1*15:01P
PRIMERO_058	A*01:01P	A*02:01P	B*08:01P	B*44:03P	C*16:01P	C*07:01P	DPB1*01:01P	DPB1*04:01P	DQA1*05:01P	DQA1*05:01P	DQB1*02:01P	DQB1*02:01P	DRB1*03:01P	DRB1*03:01P
PRIMERO_145	A*03:01P	A*02:01P	B*40:01P	B*40:02P	C*03:04P	C*03:04P	DPB1*03:01P	DPB1*03:01P	DQA1*01:02P	DQA1*01:02P	DQB1*06:04P	DQB1*03:276N	DRB1*11:01P	DRB1*13:02P
PRIMERO_021	A*11:01P	A*02:01P	B*35:01P	B*50:01P	C*06:02P	C*04:01P	DPB1*04:01P	DPB1*16:01P	DQA1*01:01P	DQA1*02:01P	DQB1*05:03P	DQB1*02:01P	DRB1*07:01P	DRB1*14:01P
PRIMERO_036	A*01:01P	A*01:01P	B*08:01P	B*08:01P	C*07:01P	C*07:01P	DPB1*01:01P	DPB1*03:01P	DQA1*05:01P	DQA1*05:01P	DQB1*02:01P	DQB1*02:01P	DRB1*03:01P	DRB1*03:01P
PRIMERO_084	A*02:01P	A*32:01P	B*51:01P	B*27:05P	C*15:02P	C*02:02P	DPB1*01:01P	DPB1*04:01P	DQA1*05:01P	DQA1*01:01P	DQB1*05:01P	DQB1*03:01P	DRB1*01:01P	DRB1*11:01P
PRIMERO_096	A*02:01P	A*02:01P	B*13:02P	B*15:01P	C*06:02P	C*03:03P	DPB1*14:01P	DPB1*04:02P	DQA1*02:01P	DQA1*03:01P	DQB1*02:12	DQB1*02:12	DRB1*04:01P	DRB1*07:01P
PRIMERO_119	A*03:01P	A*02:01P	B*57:01P	B*44:02P	C*07:02P	C*07:04P	DPB1*02:01P	DPB1*04:01P	DQA1*02:01P	DQA1*05:01P	DQB1*03:01P	DQB1*03:03P	DRB1*07:01P	DRB1*12:01P
PRIMERO_026	A*01:01P	A*02:01P	B*35:01P	B*51:01P	C*02:02P	C*04:01P	DPB1*04:01P	DPB1*04:02P	DQA1*03:01P	DQA1*05:01P	DQB1*03:02P	DQB1*03:01P	DRB1*04:01P	DRB1*12:01P
PRIMERO_057	A*29:02P	A*01:01P	B*07:02P	B*08:01P	C*07:01P	C*07:02P	DPB1*01:01P	DPB1*04:01P	DQA1*01:02P	DQA1*05:01P	DQB1*06:02P	DQB1*06:02P	DRB1*03:01P	DRB1*15:01P
PRIMERO_139	A*02:01P	A*30:01P	B*13:02P	B*27:05P	C*02:02P	C*06:02P	DPB1*19:01P	DPB1*19:01P	DQA1*01:01P	DQA1*01:02P	DQB1*06:04P	DQB1*05:01P	DRB1*01:01P	DRB1*13:02P
PRIMERO_017	A*32:01P	A*02:01P	B*07:02P	B*15:01P	C*07:02P	C*04:01P	DPB1*02:01P	DPB1*04:02P	DQA1*01:02P	DQA1*05:01P	DQB1*03:276N	DQB1*06:02P	DRB1*15:01P	DRB1*12:01P
PRIMERO_055	A*02:01P	A*02:01P	B*57:01P	B*07:02P	C*07:02P	C*06:02P	DPB1*04:01P	DPB1*04:01P	DQA1*02:01P	DQA1*05:01P	DQB1*03:03P	DQB1*03:01P	DRB1*07:01P	DRB1*11:01P
PRIMERO_108	A*68:01P	A*68:01P	B*40:01P	B*51:01P	C*03:04P	C*15:02P	DPB1*02:01P	DPB1*03:01P	DQA1*01:02P	DQA1*01:03P	DQB1*06:04P	DQB1*06:03P	DRB1*13:01P	DRB1*13:02P
PRIMERO_070	A*11:01P	A*01:01P	B*38:01P	B*40:01P	C*03:04P	C*12:03P	DPB1*04:01P	DPB1*04:01P	DQA1*01:02P	DQA1*01:02P	DQB1*06:04P	DQB1*06:04P	DRB1*13:02P	DRB1*13:02P
PRIMERO_075	A*31:01P	A*01:01P	B*07:02P	B*08:01P	C*07:01P	C*07:02P	DPB1*02:01P	DPB1*03:01P	DQA1*01:03P	DQA1*05:01P	DQB1*06:03P	DQB1*06:03P	DRB1*03:01P	DRB1*15:01P
PRIMERO_030	A*02:01P	A*24:02P	B*15:01P	B*51:01P	C*01:02P	C*03:03P	DPB1*04:01P	DPB1*03:01P	DQA1*01:01P	DQA1*01:01P	DQB1*05:01P	DQB1*05:01P	DRB1*01:01P	DRB1*01:01P
PRIMERO_027	A*03:01P	A*02:01P	B*57:01P	B*07:02P	C*07:02P	C*07:02P	DPB1*04:01P	DPB1*04:01P	DQA1*02:01P	DQA1*01:02P	DQB1*06:02P	DQB1*03:03P	DRB1*15:01P	DRB1*07:01P
PRIMERO_117	A*03:01P	A*01:01P	B*08:01P	B*08:01P	C*07:01P	C*07:01P	DPB1*01:01P	DPB1*04:01P	DQA1*05:01P	DQA1*05:01P	DQB1*02:53Q	DQB1*02:53Q	DRB1*03:01P	DRB1*03:01P
PRIMERO_077	A*29:02P	A*02:01P	B*41:01P	B*45:01P	C*17:01P	C*06:02P	DPB1*03:01P	DPB1*04:02P	DQA1*01:01P	DQA1*03:01P	DQB1*05:01P	DQB1*05:01P	DRB1*01:01P	DRB1*04:01P
PRIMERO_116	A*01:01P	A*03:01P	B*57:01P	B*18:01P	C*07:02P	C*05:01P	DPB1*04:01P	DPB1*04:01P	DQA1*02:01P	DQA1*05:01P	DQB1*02:53Q	DQB1*03:03P	DRB1*03:01P	DRB1*07:01P
PRIMERO_031	A*02:01P	A*03:01P	B*07:02P	B*44:02P	C*07:02P	C*07:04P	DPB1*09:01P	DPB1*03:01P	DQA1*01:02P	DQA1*01:02P	DQB1*06:02P	DQB1*06:02P	DRB1*15:01P	DRB1*15:01P
PRIMERO_047	A*01:01P	A*68:01P	B*35:01P	B*35:01P	C*04:01P	C*04:01P	DPB1*19:01P	DPB1*05:01P	DQA1*01:02P	DQA1*01:01P	DQB1*05:01P	DQB1*06:02P	DRB1*01:01P	DRB1*15:01P
PRIMERO_065	A*02:07P	A*02:01P	B*46:01P	B*51:01P	C*14:02P	C*01:02P	DPB1*05:01P	DPB1*04:01P	DQA1*01:02P	DQA1*01:02P	DQB1*05:02P	DQB1*03:276N	DRB1*16:01P	DRB1*12:01P
PRIMERO_115	A*02:01P	A*02:01P	B*39:06P	B*27:05P	C*07:02P	C*01:02P	DPB1*04:02P	DPB1*02:01P					DRB1*01:01P	DRB1*11:01P
PRIMERO_013	A*01:01P	A*02:01P	B*15:01P	B*57:01P	C*06:02P	C*06:02P	DPB1*04:02P	DPB1*04:01P	DQA1*02:01P	DQA1*03:01P	DQB1*03:02P	DQB1*03:03P	DRB1*04:01P	DRB1*07:01P
PRIMERO_143	A*11:01P	A*02:01P	B*15:01P	B*35:01P	C*04:01P	C*03:03P	DPB1*04:02P	DPB1*04:02P	DQA1*01:01P	DQA1*03:01P	DQB1*05:01P	DQB1*03:01P	DRB1*01:01P	DRB1*04:01P
PRIMERO_130	A*02:01P	A*02:01P	B*15:01P	B*18:01P	C*07:01P	C*03:04P	DPB1*04:01P	DPB1*04:01P	DQA1*03:01P	DQA1*05:01P			DRB1*04:01P	DRB1*11:04P
PRIMERO_136	A*03:01P	A*02:01P	B*35:01P	B*51:01P	C*04:01P	C*14:02P	DPB1*03:01P	DPB1*02:01P	DQA1*03:01P	DQA1*06:01P	DQB1*03:01P	DQB1*03:02P	DRB1*04:04P	DRB1*08:03P
PRIMERO_069	A*30:01P	A*26:01P	B*13:02P	B*27:05P	C*01:02P	C*06:02P	DPB1*04:01P	DPB1*04:02P	DQA1*05:01P	DQA1*01:01P	DQB1*05:01P	DQB1*03:01P	DRB1*01:01P	DRB1*11:01P
PRIMERO_039	A*30:02P	A*03:01P	B*18:01P	B*55:01P	C*05:01P	C*03:03P	DPB1*02:02P	DPB1*04:01P	DQA1*03:01P	DQA1*05:01P	DQB1*02:01P	DQB1*03:02P	DRB1*03:01P	DRB1*04:01P
PRIMERO_009	A*24:02P	A*24:02P	B*07:02P	B*40:01P	C*07:02P	C*03:04P	DPB1*02:01P	DPB1*02:01P	DQA1*01:01P	DQA1*01:01P	DQB1*05:01P	DQB1*05:01P	DRB1*01:01P	DRB1*01:03P
PRIMERO_125	A*01:01P	A*03:01P	B*07:02P	B*07:02P	C*07:02P	C*07:02P	DPB1*03:01P	DPB1*03:01P	DQA1*01:02P	DQA1*01:02P	DQB1*06:02P	DQB1*06:02P	DRB1*15:01P	DRB1*15:01P
PRIMERO_025	A*01:01P	A*24:02P	B*35:03P	B*35:03P	C*12:03P	C*04:01P	DPB1*04:01P	DPB1*04:01P	DQA1*01:01P	DQA1*03:01P	DQB1*03:04P	DQB1*05:01P	DRB1*01:01P	DRB1*04:08P
PRIMERO_121	A*01:01P	A*03:01P	B*07:02P	B*44:02P	C*07:02P	C*05:01P	DPB1*04:01P	DPB1*04:02P	DQA1*05:01P	DQA1*01:02P	DQB1*06:02P	DQB1*03:01P	DRB1*12:01P	DRB1*15:01P
PRIMERO_020	A*03:01P	A*68:01P	B*27:05P	B*44:02P	C*07:04P	C*01:02P	DPB1*02:01P	DPB1*04:01P	DQA1*01:01P	DQA1*01:03P	DQB1*05:01P	DQB1*05:03P	DRB1*01:01P	DRB1*14:01P
PRIMERO_094	A*01:01P	A*01:01P	B*08:01P	B*08:01P	C*07:01P	C*07:01P	DPB1*04:01P	DPB1*04:02P	DQA1*05:01P	DQA1*05:01P			DRB1*03:01P	DRB1*03:01P
PRIMERO_079	A*01:01P	A*02:01P	B*08:01P	B*44:02P	C*07:01P	C*05:01P	DPB1*02:01P	DPB1*04:01P	DQA1*05:01P	DQA1*05:01P	DQB1*02:53Q	DQB1*03:01P	DRB1*12:01P	DRB1*03:01P
PRIMERO_114	A*01:01P	A*01:01P	B*08:01P	B*08:01P	C*07:01P	C*07:01P	DPB1*01:01P	DPB1*01:01P					DRB1*03:01P	DRB1*03:01P
PRIMERO_129	A*02:01P	A*11:01P	B*57:01P	B*51:01P	C*01:02P	C*06:02P	DPB1*04:01P	DPB1*04:01P					DRB1*07:01P	DRB1*07:01P
PRIMERO_061	A*01:01P	A*03:01P	B*07:02P	B*08:01P	C*07:01P	C*07:02P	DPB1*04:02P	DPB1*03:01P	DQA1*01:02P	DQA1*01:01P	DQB1*05:03P	DQB1*06:02P	DRB1*15:01P	DRB1*14:01P
PRIMERO_100	A*24:02P	A*01:01P	B*08:01P	B*27:02P	C*07:01P	C*02:02P	DPB1*01:01P	DPB1*04:02P	DQA1*05:01P	DQA1*01:02P	DQB1*05:02P	DQB1*05:02P	DRB1*03:01P	DRB1*16:01P
PRIMERO_002	A*01:01P	A*02:01P	B*08:01P	B*44:02P	C*07:01P	C*05:01P	DPB1*04:01P	DPB1*04:02P	DQA1*01:03P	DQA1*01:01P	DQB1*06:03P	DQB1*05:01P	DRB1*01:01P	DRB1*13:01P
PRIMERO_068	A*01:01P	A*68:01P	B*35:03P	B*37:01P	C*04:01P	C*06:02P	DPB1*02:01P	DPB1*04:01P	DQA1*01:02P	DQA1*05:01P	DQB1*06:04P	DQB1*03:01P	DRB1*12:01P	DRB1*13:02P
PRIMERO_089	A*29:02P	A*02:01P	B*07:02P	B*44:03P	C*16:01P	C*07:02P	DPB1*11:01P	DPB1*04:01P	DQA1*01:02P	DQA1*02:01P	DQB1*06:02P	DQB1*06:02P	DRB1*07:01P	DRB1*15:01P
PRIMERO_008	A*11:01P	A*24:02P	B*35:01P	B*07:02P	C*07:02P	C*04:01P	DPB1*04:01P	DPB1*04:02P	DQA1*01:07P	DQA1*01:01P	DQB1*05:03P	DQB1*05:01P	DRB1*01:01P	DRB1*14:01P
PRIMERO_034	A*24:02P	A*24:02P	B*44:05P	B*47:01P	C*02:02P	C*06:02P	DPB1*06:01P	DPB1*13:01P	DQA1*01:01P	DQA1*01:02P	DQB1*05:01P	DQB1*05:02P	DRB1*01:02P	DRB1*16:01P
PRIMERO_016	A*02:01P	A*02:01P	B*15:01P	B*51:01P	C*03:04P	C*02:02P	DPB1*04:01P	DPB1*04:01P	DQA1*03:01P	DQA1*03:01P	DQB1*03:276N	DQB1*03:99Q	DRB1*04:01P	DRB1*11:01P
PRIMERO_004	A*11:01P	A*03:01P	B*51:01P	B*07:02P	C*07:02P	C*02:02P	DPB1*19:01P	DPB1*02:01P	DQA1*01:02P	DQA1*01:01P	DQB1*05:01P	DQB1*06:02P	DRB1*01:01P	DRB1*15:01P
PRIMERO_014	A*01:01P	A*03:01P	B*39:06P	B*35:03P	C*07:02P	C*12:03P	DPB1*04:01P	DPB1*06:01P	DQA1*01:01P	DQA1*01:01P	DQB1*05:01P	DQB1*05:01P	DRB1*01:01P	DRB1*01:01P
PRIMERO_059	A*26:01P	A*02:01P	B*15:03P	B*51:01P	C*14:04	C*12:03P	DPB1*02:01P	DPB1*02:01P	DQA1*05:01P	DQA1*05:01P	DQB1*03:01P	DQB1*03:01P	DRB1*11:01P	DRB1*11:21
PRIMERO_072	A*29:02P	A*02:01P	B*51:01P	B*44:02P	C*02:02P	C*05:01P	DPB1*04:01P	DPB1*04:01P	DQA1*01:02P	DQA1*05:01P	DQB1*06:02P	DQB1*06:02P	DRB1*11:01P	DRB1*15:01P
PRIMERO_095	A*02:01P	A*02:01P	B*37:01P	B*41:01P	C*17:01P	C*06:02P	DPB1*14:01P	DPB1*03:01P	DQA1*01:01P	DQA1*02:01P	DQB1*05:01P	DQB1*03:03P	DRB1*07:01P	DRB1*10:01P
PRIMERO_071	A*02:01P	A*01:01P	B*35:01P	B*08:01P	C*07:01P	C*04:01P	DPB1*11:01P	DPB1*04:01P	DQA1*01:01P	DQA1*01:01P	DQB1*05:01P	DQB1*05:01P	DRB1*01:01P	DRB1*03:01P
PRIMERO_111	A*03:01P	A*02:01P	B*18:01P	B*07:02P	C*07:01P	C*07:02P	DPB1*04:01P	DPB1*04:01P	DQA1*01:02P	DQA1*05:01P	DQB1*06:02P	DQB1*03:01P	DRB1*11:01P	DRB1*15:01P
PRIMERO_112	A*02:01P	A*02:01P	B*07:44N	B*13:02P	C*07:02P	C*02:02P	DPB1*738:01N	DPB1*05:01P	DQA1*02:01P	DQA1*01:02P	DQB1*06:02P	DQB1*06:02P	DRB1*07:01P	DRB1*15:01P
PRIMERO_091	A*32:01P	A*01:01P	B*08:01P	B*44:02P	C*07:01P	C*05:01P	DPB1*01:01P	DPB1*03:01P	DQA1*03:01P	DQA1*05:01P	DQB1*02:01P	DQB1*03:02P	DRB1*03:01P	DRB1*04:01P
PRIMERO_122	A*29:02P	A*32:01P	B*55:01P	B*44:03P	C*16:01P	C*03:03P	DPB1*04:01P	DPB1*04:01P	DQA1*01:01P	DQA1*01:01P	DQB1*05:01P	DQB1*05:03P	DRB1*01:01P	DRB1*14:01P
PRIMERO_128	A*31:01P	A*29:02P	B*40:01P	B*44:03P	C*16:01P	C*03:04P	DPB1*11:01P	DPB1*02:01P	DQA1*02:01P	DQA1*03:01P	DQB1*02:01P	DQB1*03:02P	DRB1*04:04P	DRB1*07:01P
PRIMERO_123	A*32:01P	A*24:02P	B*40:02P	B*15:01P	C*02:02P	C*07:02P	DPB1*02:01P	DPB1*10:01P	DQA1*01:03P	DQA1*01:03P	DQB1*06:03P	DQB1*03:276N	DRB1*11:01P	DRB1*13:01P
PRIMERO_081	A*31:01P	A*24:02P	B*15:01P	B*07:02P	C*07:02P	C*03:04P	DPB1*04:01P	DPB1*04:01P	DQA1*01:01P	DQA1*05:01P	DQB1*05:01P	DQB1*03:01P	DRB1*01:01P	DRB1*11:01P
PRIMERO_124	A*31:01P	A*68:01P	B*45:01P	B*51:01P	C*04:01P	C*06:02P	DPB1*11:01P	DPB1*20:01P	DQA1*01:01P	DQA1*03:01P	DQB1*05:01P	DQB1*03:02P	DRB1*01:01P	DRB1*04:05P
PRIMERO_109	A*24:02P	A*24:02P	B*39:01P	B*15:01P	C*07:04P	C*12:03P	DPB1*04:02P	DPB1*03:01P	DQA1*01:02P	DQA1*01:02P	DQB1*05:02P	DQB1*05:02P	DRB1*16:01P	DRB1*16:01P
PRIMERO_011	A*32:01P	A*02:01P	B*07:02P	B*44:02P	C*05:01P	C*07:02P	DPB1*04:01P	DPB1*04:01P	DQA1*01:02P	DQA1*03:01P	DQB1*06:02P	DQB1*06:02P	DRB1*04:07P	DRB1*15:01P
PRIMERO_043	A*03:01P	A*68:01P	B*07:02P	B*44:02P	C*07:02P	C*05:01P	DPB1*02:01P	DPB1*04:01P	DQA1*01:02P	DQA1*01:02P	DQB1*06:02P	DQB1*06:03P	DRB1*15:01P	DRB1*15:01P
PRIMERO_076	A*30:01P	A*68:01P	B*13:02P	B*51:01P	C*06:02P	C*15:02P	DPB1*04:01P	DPB1*04:01P	DQA1*04:01P	DQA1*01:01P	DQB1*05:01P	DQB1*04:02P	DRB1*01:01P	DRB1*08:01P
PRIMERO_053	A*02:01P	A*02:01P	B*27:05P	B*44:02P	C*01:02P	C*05:01P	DPB1*23:01P	DPB1*03:01P	DQA1*03:01P	DQA1*01:01P	DQB1*05:01P	DQB1*03:01P	DRB1*01:01P	DRB1*04:01P
PRIMERO_098	A*01:01P	A*01:01P	B*08:01P	B*08:01P	C*07:01P	C*07:01P	DPB1*04:02P	DPB1*03:01P	DQA1*01:01P	DQA1*01:02P	DQB1*05:03P	DQB1*06:02P	DRB1*15:01P	DRB1*14:01P
PRIMERO_066	A*11:01P	A*01:01P	B*55:01P	B*08:01P	C*03:03P	C*07:01P	DPB1*02:01P	DPB1*04:01P	DQA1*01:01P	DQA1*01:01P	DQB1*05:03P	DQB1*05:03P	DRB1*14:01P	DRB1*14:01P
PRIMERO_060	A*03:01P	A*02:01P	B*15:01P	B*44:03P	C*16:01P	C*03:03P	DPB1*11:01P	DPB1*04:01P	DQA1*01:03P	DQA1*02:01P	DQB1*06:03P	DQB1*06:03P	DRB1*07:01P	DRB1*13:01P
PRIMERO_085	A*02:01P	A*02:01P	B*15:01P	B*15:01P	C*06:02P	C*03:04P	DPB1*02:01P	DPB1*04:01P	DQA1*03:01P	DQA1*01:02P	DQB1*06:02P	DQB1*03:02P	DRB1*04:01P	DRB1*15:01P
PRIMERO_137	A*25:01P	A*02:01P	B*13:02P	B*57:01P	C*06:02P	C*06:02P	DPB1*04:01P	DPB1*20:01P	DQA1*04:01P	DQA1*01:01P	DQB1*05:01P	DQB1*04:02P	DRB1*01:01P	DRB1*08:01P
PRIMERO_074	A*02:01P	A*68:01P	B*07:02P	B*40:01P	C*03:04P	C*07:02P	DPB1*04:01P	DPB1*03:01P	DQA1*01:02P	DQA1*01:02P	DQB1*06:04P	DQB1*06:02P	DRB1*13:02P	DRB1*15:01P
PRIMERO_087	A*30:01P	A*02:01P	B*15:01P	B*07:02P	C*07:02P	C*07:02P	DPB1*04:01P	DPB1*04:02P	DQA1*01:03P	DQA1*03:01P	DQB1*06:03P	DQB1*03:02P	DRB1*13:01P	DRB1*09:01P
PRIMERO_127	A*01:01P	A*02:01P	B*52:01P	B*07:02P	C*07:02P	C*12:02P	DPB1*02:01P	DPB1*04:01P	DQA1*01:02P	DQA1*01:03P	DQB1*06:01P	DQB1*06:02P	DRB1*15:01P	DRB1*15:02P
PRIMERO_049	A*02:01P	A*02:01P	B*57:01P	B*07:02P	C*06:02P	C*07:02P	DPB1*10:01P	DPB1*14:01P	DQA1*03:01P	DQA1*05:01P	DQB1*03:02P	DQB1*03:01P	DRB1*04:04P	DRB1*11:01P
PRIMERO_097	A*01:01P	A*03:01P	B*07:02P	B*07:02P	C*07:02P	C*03:04P	DPB1*04:01P	DPB1*04:01P	DQA1*01:02P	DQA1*01:02P	DQB1*06:02P	DQB1*06:02P	DRB1*15:01P	DRB1*15:01P

## Sheet:  HLA <> TCs (SF4)
tc_id	hla_allele	hla_allele_tc_mm_mwu_pvalue	hla_allele_tc_mm_mwu_pvalue_bonferroni	hla_allele_tc_mm_mwu_pvalue_bonferroni_passed
TC671	B*07:02	0.000236018	0.00944073	TRUE
TC671	C*07:02	0.00197471	0.0789883	FALSE
TC671	DRB1*03:01	0.00229061	0.0916243	FALSE
TC671	DQA1*01:01	0.00678501	0.2714	FALSE
TC671	DQB1*05:01	0.0181438	0.725751	FALSE
TC671	DRB1*13:01	0.027869	1	FALSE
TC671	DQB1*03:02	0.0302116	1	FALSE
TC671	DQB1*06:03	0.0457977	1	FALSE
TC671	DRB1*01:01	0.0467334	1	FALSE
TC671	DQB1*06:02	0.0645857	1	FALSE
TC671	DRB1*15:01	0.0739088	1	FALSE
TC671	B*40:01	0.0914033	1	FALSE
TC671	DQB1*02:01	0.0932541	1	FALSE
TC671	C*07:01	0.0948639	1	FALSE
TC671	C*06:02	0.10248	1	FALSE
TC671	DQA1*01:03	0.10668	1	FALSE
TC671	B*08:01	0.121842	1	FALSE
TC671	B*44:02	0.122282	1	FALSE
TC671	A*01:01	0.124181	1	FALSE
TC671	DQB1*03:03	0.171743	1	FALSE
TC671	DQB1*03:01	0.188793	1	FALSE
TC671	DQA1*03:01	0.210145	1	FALSE
TC671	A*68:01	0.217855	1	FALSE
TC671	B*51:01	0.243278	1	FALSE
TC671	DRB1*04:01	0.287291	1	FALSE
TC671	A*03:01	0.289372	1	FALSE
TC671	DQA1*05:01	0.338064	1	FALSE
TC671	B*15:01	0.441601	1	FALSE
TC671	A*02:01	0.446518	1	FALSE
TC671	DQA1*01:02	0.469504	1	FALSE
TC671	B*35:01	0.661221	1	FALSE
TC671	A*24:02	0.673309	1	FALSE
TC671	C*04:01	0.67891	1	FALSE
TC671	C*03:04	0.697605	1	FALSE
TC671	DRB1*07:01	0.701133	1	FALSE
TC671	DRB1*11:01	0.749471	1	FALSE
TC671	B*57:01	0.796611	1	FALSE
TC671	DQA1*02:01	0.913592	1	FALSE
TC671	C*05:01	0.951992	1	FALSE
TC671	A*11:01	0.981307	1	FALSE
TC865	B*08:01	0.000167202	0.00668809	TRUE
TC865	C*07:01	0.00043456	0.0173824	TRUE
TC865	DRB1*03:01	0.00199005	0.0796021	FALSE
TC865	DQB1*06:03	0.0175072	0.700288	FALSE
TC865	DQB1*05:01	0.0204651	0.818603	FALSE
TC865	DQB1*03:02	0.0279327	1	FALSE
TC865	DRB1*13:01	0.0319074	1	FALSE
TC865	DRB1*01:01	0.0367542	1	FALSE
TC865	B*44:02	0.037138	1	FALSE
TC865	DQB1*02:01	0.0402786	1	FALSE
TC865	DQA1*01:01	0.0452933	1	FALSE
TC865	B*07:02	0.0553121	1	FALSE
TC865	C*06:02	0.0578195	1	FALSE
TC865	DQA1*01:03	0.0604401	1	FALSE
TC865	B*51:01	0.0611938	1	FALSE
TC865	C*07:02	0.153154	1	FALSE
TC865	DQB1*03:03	0.15985	1	FALSE
TC865	B*15:01	0.161721	1	FALSE
TC865	A*01:01	0.211548	1	FALSE
TC865	DQA1*05:01	0.255778	1	FALSE
TC865	A*02:01	0.257235	1	FALSE
TC865	C*04:01	0.294249	1	FALSE
TC865	DQA1*03:01	0.304653	1	FALSE
TC865	B*57:01	0.307301	1	FALSE
TC865	A*11:01	0.340105	1	FALSE
TC865	C*05:01	0.351468	1	FALSE
TC865	DQB1*06:02	0.402731	1	FALSE
TC865	DQB1*03:01	0.413683	1	FALSE
TC865	DRB1*04:01	0.417868	1	FALSE
TC865	DQA1*01:02	0.472011	1	FALSE
TC865	C*03:04	0.472326	1	FALSE
TC865	A*68:01	0.493176	1	FALSE
TC865	DRB1*15:01	0.507224	1	FALSE
TC865	A*24:02	0.591028	1	FALSE
TC865	B*40:01	0.656402	1	FALSE
TC865	DRB1*07:01	0.687049	1	FALSE
TC865	DQA1*02:01	0.697854	1	FALSE
TC865	DRB1*11:01	0.718584	1	FALSE
TC865	A*03:01	0.729689	1	FALSE
TC865	B*35:01	0.873621	1	FALSE
TC1093	A*01:01	1.4168e-21	5.66721e-20	TRUE
TC1093	B*08:01	1.02856e-09	4.11424e-08	TRUE
TC1093	DRB1*03:01	3.34177e-07	1.33671e-05	TRUE
TC1093	C*07:01	7.33068e-07	2.93227e-05	TRUE
TC1093	A*02:01	9.13301e-07	3.6532e-05	TRUE
TC1093	A*11:01	0.00135866	0.0543465	FALSE
TC1093	B*51:01	0.00963053	0.385221	FALSE
TC1093	DQB1*03:02	0.032231	1	FALSE
TC1093	DQA1*05:01	0.0356588	1	FALSE
TC1093	A*68:01	0.0547834	1	FALSE
TC1093	DQA1*03:01	0.0642663	1	FALSE
TC1093	C*03:04	0.0648527	1	FALSE
TC1093	DRB1*11:01	0.0990622	1	FALSE
TC1093	B*40:01	0.101514	1	FALSE
TC1093	DQA1*02:01	0.108821	1	FALSE
TC1093	DRB1*07:01	0.131313	1	FALSE
TC1093	B*07:02	0.137238	1	FALSE
TC1093	C*07:02	0.169167	1	FALSE
TC1093	DQA1*01:02	0.178065	1	FALSE
TC1093	A*24:02	0.181393	1	FALSE
TC1093	A*03:01	0.189785	1	FALSE
TC1093	DQB1*06:02	0.230305	1	FALSE
TC1093	DQB1*02:01	0.271947	1	FALSE
TC1093	B*15:01	0.308502	1	FALSE
TC1093	DRB1*15:01	0.343936	1	FALSE
TC1093	DQA1*01:03	0.408451	1	FALSE
TC1093	B*44:02	0.440589	1	FALSE
TC1093	DQB1*03:03	0.445557	1	FALSE
TC1093	DRB1*04:01	0.497729	1	FALSE
TC1093	B*35:01	0.539533	1	FALSE
TC1093	DQA1*01:01	0.577578	1	FALSE
TC1093	B*57:01	0.646543	1	FALSE
TC1093	DQB1*03:01	0.694289	1	FALSE
TC1093	C*06:02	0.708912	1	FALSE
TC1093	DQB1*06:03	0.726167	1	FALSE
TC1093	C*04:01	0.781923	1	FALSE
TC1093	DRB1*01:01	0.794264	1	FALSE
TC1093	DRB1*13:01	0.832985	1	FALSE
TC1093	C*05:01	0.897349	1	FALSE
TC1093	DQB1*05:01	0.922992	1	FALSE
TC1125	A*01:01	2.09638e-10	8.38553e-09	TRUE
TC1125	B*08:01	2.39858e-08	9.59434e-07	TRUE
TC1125	C*07:01	3.00108e-08	1.20043e-06	TRUE
TC1125	DRB1*03:01	0.000251179	0.0100472	TRUE
TC1125	DQA1*05:01	0.00739376	0.29575	FALSE
TC1125	A*02:01	0.0121039	0.484155	FALSE
TC1125	DQA1*02:01	0.0309191	1	FALSE
TC1125	DQB1*03:02	0.039984	1	FALSE
TC1125	DQB1*06:02	0.0542025	1	FALSE
TC1125	DRB1*07:01	0.0660756	1	FALSE
TC1125	DQA1*03:01	0.0903776	1	FALSE
TC1125	DQB1*03:03	0.0971609	1	FALSE
TC1125	DRB1*15:01	0.111981	1	FALSE
TC1125	C*03:04	0.117134	1	FALSE
TC1125	C*07:02	0.123611	1	FALSE
TC1125	B*40:01	0.124393	1	FALSE
TC1125	B*51:01	0.171463	1	FALSE
TC1125	C*05:01	0.190136	1	FALSE
TC1125	DRB1*01:01	0.192273	1	FALSE
TC1125	DQB1*05:01	0.245143	1	FALSE
TC1125	DRB1*04:01	0.256295	1	FALSE
TC1125	B*15:01	0.278188	1	FALSE
TC1125	B*07:02	0.322155	1	FALSE
TC1125	A*24:02	0.336194	1	FALSE
TC1125	DQB1*02:01	0.33692	1	FALSE
TC1125	DQA1*01:03	0.358195	1	FALSE
TC1125	B*44:02	0.38817	1	FALSE
TC1125	DRB1*11:01	0.407046	1	FALSE
TC1125	DQB1*03:01	0.554676	1	FALSE
TC1125	C*06:02	0.571172	1	FALSE
TC1125	DQA1*01:02	0.606226	1	FALSE
TC1125	DQB1*06:03	0.62034	1	FALSE
TC1125	B*35:01	0.656522	1	FALSE
TC1125	A*03:01	0.665381	1	FALSE
TC1125	A*11:01	0.680553	1	FALSE
TC1125	C*04:01	0.705136	1	FALSE
TC1125	DQA1*01:01	0.758469	1	FALSE
TC1125	B*57:01	0.770892	1	FALSE
TC1125	DRB1*13:01	0.991988	1	FALSE
TC1125	A*68:01	1	1	FALSE
TC1175	DRB1*03:01	1.2119e-17	4.8476e-16	TRUE
TC1175	B*08:01	1.79068e-13	7.16271e-12	TRUE
TC1175	C*07:01	8.38919e-12	3.35567e-10	TRUE
TC1175	DQA1*05:01	4.23757e-11	1.69503e-09	TRUE
TC1175	A*01:01	1.44423e-06	5.77693e-05	TRUE
TC1175	DQB1*06:02	0.00034283	0.0137132	TRUE
TC1175	DQB1*02:01	0.000594539	0.0237815	TRUE
TC1175	DRB1*15:01	0.00107217	0.0428866	TRUE
TC1175	DQA1*03:01	0.00192663	0.0770654	FALSE
TC1175	DQB1*05:01	0.00208716	0.0834862	FALSE
TC1175	DQA1*01:01	0.00415251	0.166101	FALSE
TC1175	DRB1*01:01	0.00462195	0.184878	FALSE
TC1175	DRB1*13:01	0.00912098	0.364839	FALSE
TC1175	DQB1*06:03	0.0106931	0.427724	FALSE
TC1175	DQA1*01:02	0.012	0.479999	FALSE
TC1175	DRB1*07:01	0.0120682	0.48273	FALSE
TC1175	DQA1*01:03	0.0133714	0.534857	FALSE
TC1175	DQB1*03:02	0.0161993	0.647972	FALSE
TC1175	DQA1*02:01	0.0194627	0.778508	FALSE
TC1175	C*06:02	0.0230309	0.921238	FALSE
TC1175	DRB1*11:01	0.023534	0.94136	FALSE
TC1175	DQB1*03:03	0.042475	1	FALSE
TC1175	C*07:02	0.0444559	1	FALSE
TC1175	B*07:02	0.0611358	1	FALSE
TC1175	A*24:02	0.0728271	1	FALSE
TC1175	DQB1*03:01	0.0891375	1	FALSE
TC1175	B*57:01	0.136352	1	FALSE
TC1175	DRB1*04:01	0.14008	1	FALSE
TC1175	A*02:01	0.185914	1	FALSE
TC1175	C*03:04	0.375449	1	FALSE
TC1175	C*05:01	0.394507	1	FALSE
TC1175	B*40:01	0.428384	1	FALSE
TC1175	C*04:01	0.664094	1	FALSE
TC1175	B*35:01	0.670659	1	FALSE
TC1175	A*11:01	0.776017	1	FALSE
TC1175	B*51:01	0.776545	1	FALSE
TC1175	A*68:01	0.890017	1	FALSE
TC1175	B*15:01	0.933211	1	FALSE
TC1175	B*44:02	0.9383	1	FALSE
TC1175	A*03:01	0.939805	1	FALSE
TC1238	B*08:01	7.65202e-09	3.06081e-07	TRUE
TC1238	C*07:01	3.30344e-07	1.32138e-05	TRUE
TC1238	DRB1*03:01	1.55212e-06	6.2085e-05	TRUE
TC1238	C*07:02	5.07519e-06	0.000203008	TRUE
TC1238	C*06:02	1.15534e-05	0.000462138	TRUE
TC1238	A*01:01	1.8949e-05	0.00075796	TRUE
TC1238	B*07:02	3.92886e-05	0.00157154	TRUE
TC1238	DQA1*01:02	5.6256e-05	0.00225024	TRUE
TC1238	C*04:01	0.000211189	0.00844755	TRUE
TC1238	B*35:01	0.000417841	0.0167136	TRUE
TC1238	DQB1*06:02	0.000923004	0.0369202	TRUE
TC1238	DRB1*15:01	0.00146793	0.058717	FALSE
TC1238	DQB1*02:01	0.00346266	0.138507	FALSE
TC1238	B*57:01	0.00967025	0.38681	FALSE
TC1238	A*03:01	0.0127027	0.508108	FALSE
TC1238	B*15:01	0.0157293	0.629171	FALSE
TC1238	DQB1*06:03	0.0287742	1	FALSE
TC1238	DRB1*13:01	0.0293286	1	FALSE
TC1238	DQA1*01:03	0.0293526	1	FALSE
TC1238	C*03:04	0.0389537	1	FALSE
TC1238	A*02:01	0.0469099	1	FALSE
TC1238	A*68:01	0.0488662	1	FALSE
TC1238	DQB1*03:03	0.0550518	1	FALSE
TC1238	DQA1*02:01	0.0672237	1	FALSE
TC1238	DRB1*07:01	0.0674932	1	FALSE
TC1238	DQA1*05:01	0.0849436	1	FALSE
TC1238	B*51:01	0.101629	1	FALSE
TC1238	A*11:01	0.116451	1	FALSE
TC1238	DRB1*11:01	0.200448	1	FALSE
TC1238	DRB1*01:01	0.29795	1	FALSE
TC1238	B*40:01	0.345471	1	FALSE
TC1238	C*05:01	0.375685	1	FALSE
TC1238	DQB1*03:01	0.40275	1	FALSE
TC1238	DQA1*03:01	0.413767	1	FALSE
TC1238	B*44:02	0.533863	1	FALSE
TC1238	DRB1*04:01	0.581573	1	FALSE
TC1238	DQB1*05:01	0.654618	1	FALSE
TC1238	A*24:02	0.747143	1	FALSE
TC1238	DQB1*03:02	0.770893	1	FALSE
TC1238	DQA1*01:01	0.882051	1	FALSE

## Sheet: Robustness resp uni (SF5)
TC	V1	V2	V3	V4	V5	V6	V7	V8	V9	V10	V11	V12	V13	V14	V15	V16	V17	V18	V19	V20	V21	V22	V23	V24	V25	V26	V27	V28	V29	V30	V31	V32	V33	V34	V35	V36	V37	V38	V39	V40	V41	V42	V43	V44	V45	V46	V47	V48	V49
TC3	-0.364459	0.0460274	-0.884136	-0.189389	-0.274661	-0.177882	-0.270043	-0.868148	-0.467308	-1.01851	-0.206269	-1.02656	-0.223333	-0.774079	-0.177076	-0.481699	-0.491991	-0.552907	-0.486226	-0.395361	-0.256189	-0.584407	-0.311416	-0.378075	-0.634899	-0.279398	-0.772357	-1.10665	-0.449963	-0.686347	-0.239054	-0.149013	-0.578666	-0.499828	-0.618605	0.0324156	-0.267516	-0.684555	-0.420328	-0.518947	-0.961955	-0.263771	-0.605673	-0.535529	-0.506808	-0.347875	-0.874247	-0.442424	-0.598213
TC6	0.495955	0.290683	0.492097	0.086404	0.359595	0.418895	0.888595	-0.0388422	0.146918	0.356708	0.192495	0.409387	0.675443	0.41655	0.227378	0.149871	0.348643	0.372648	0.772848	0.250485	0.335768	-0.0411308	0.0877734	-0.0944286	0.095364	0.270536	-0.108838	0.418005	0.0596857	0.454289	-0.133949	0.185351	0.225666	0.350992	0.187775	0.596518	-0.0729683	0.756286	-0.0890252	0.323629	0.351604	0.0340993	0.387033	0.504555	0.55651	0.393679	0.827994	0.250751	0.568743
TC7	-0.0695752	-0.191565	-0.74779	-0.412433	-0.497704	-0.564531	-0.117745	-0.929161	-0.463065	-0.330505	-0.696014	-0.651509	-0.121666	-0.528439	-0.606807	-0.249891	-0.553247	-0.781548	-0.448395	-0.967801	-0.639318	-0.53806	-1.29111	-0.266203	-0.568887	-0.271593	-0.735007	-0.374886	-0.254221	-0.0879141	-1.004	-0.332829	-0.877931	-0.470731	-0.279979	-0.768322	-1.44389	-0.766786	-0.440472	-0.668019	-0.50031	-0.718845	-0.436808	-0.311642	-0.225309	0.0715766	-0.350102	-0.927805	-0.346583
TC8	-0.0259656	-0.558049	-0.252541	-0.425023	-0.0639624	-0.329669	-0.00484372	-0.439163	-0.117607	-0.200959	-0.384835	-0.338998	-0.318982	0.448387	-0.177601	-0.113345	-0.542337	-0.669756	0.0299212	-0.292125	-0.0526336	0.0158505	-0.122897	0.0012466	-0.367241	-0.37522	-0.115298	0.130809	-0.100144	-0.072431	-0.175778	-0.42059	-0.0756767	-0.129767	-0.0103832	0.0825089	-0.621254	-0.126895	-0.0689626	-0.134463	-0.0534349	-0.0179815	0.206547	-0.00743816	-0.219856	-0.238755	-0.0558583	-0.00166002	-0.166077
TC9	0.0235378	0.187353	0.143226	0.182556	-0.189169	0.426052	0.143128	0.198272	0.0194713	-0.0220034	0.303975	0.220709	0.0293262	-0.216613	-0.0778687	0.11881	0.152853	0.641715	0.12915	0.0121392	-0.186679	-0.135804	-0.23878	-0.0328566	0.126087	0.018773	-0.276702	-0.245852	-0.0105341	-0.189627	-0.129372	0.0532913	-0.096696	0.0922324	-0.101975	-0.13957	0.0910736	-0.0550611	-0.101142	-0.085992	-0.123654	0.0136755	-0.109875	-0.0109447	0.28158	0.0546956	0.0512737	-0.2466	0.0497522
TC11	-0.379361	-0.106303	-1.24576	-0.279922	-0.308959	-0.647637	-0.531242	-0.818643	-0.292195	-0.615467	-0.955507	-0.849242	-0.3851	-0.558695	-0.0939934	-0.377602	-0.844514	-0.613284	-0.532179	-1.25557	-0.749202	-0.646665	-0.429338	-0.506849	-0.755756	-0.48664	-0.863922	-0.663772	-0.655878	-0.676662	-0.352533	-0.475578	-1.11504	-0.40883	-0.794633	-0.757196	-1.79454	-0.668896	-0.797986	-0.736673	-1.21102	-1.38698	-0.539323	-0.690681	-0.499698	-0.249136	-0.636322	-0.464118	-0.195135
TC15	0.695739	0.484692	0.963245	0.310423	0.600892	0.514186	0.0223336	0.0748051	0.55968	0.420955	0.326382	0.687252	0.312842	1.12433	0.675317	0.830153	0.385465	0.322965	0.0569745	1.06915	0.438553	0.324038	0.853418	1.14978	0.904589	0.611059	0.659257	0.552544	0.494251	0.32934	0.417296	0.313145	0.0969752	0.645919	0.480965	0.893603	0.425975	0.22957	0.0939037	0.900827	0.772993	0.413652	0.19368	0.0141032	0.456928	0.648411	0.653843	0.00994856	0.0329665
TC19	-0.145874	-0.112763	-0.317247	-0.191327	-0.253435	-0.374344	0.0339309	-0.761325	-0.110969	-0.36294	-0.722795	-0.464657	0.0414996	-0.778804	-0.348226	-0.61396	-1.07511	-0.582632	-0.171818	-0.129507	-0.380134	-0.996132	-0.449312	-0.601846	-0.744958	-0.598765	-0.766234	-0.62126	-0.875683	-0.390032	-0.657654	-0.385474	-0.509797	-0.644402	-0.674109	0.010896	-0.749827	0.00951448	-0.56746	-0.80523	-0.461712	-0.526142	-0.3347	-0.397307	-0.0927085	-0.388618	0.00713197	-0.215053	-0.542334
TC28	-0.222207	-0.229308	-0.784666	-0.19941	-0.720835	-0.0186221	0.0379141	0.213771	-0.0492295	-0.345332	0.158922	0.119316	-0.306953	-0.304767	-0.403058	-0.197254	0.0208113	-0.285829	-0.191678	-0.395153	0.13623	-0.252335	0.00270774	0.0947793	-0.0582857	0.0187325	-0.723809	-0.499841	-0.181278	-0.140525	-0.362084	-0.00120558	-0.409557	-0.122256	-0.602177	-0.0603301	-0.249538	0.065813	-0.402367	0.0509267	-0.316118	-0.0981789	-0.102559	-0.12389	-0.139475	0.219199	-0.354373	0.0365177	-0.0605961
TC51	-0.0496684	-0.137763	-0.241178	-0.00544057	0.0536241	-0.336853	-0.0787732	-0.434689	-0.0699645	-0.346653	-0.408254	-0.549348	0.229668	-0.152048	0.055837	-0.238818	-0.23469	-0.118535	0.215594	-0.023941	-0.246734	-0.157913	-0.0278091	-0.199148	-0.298288	-0.207293	-0.0931099	-0.0440188	-0.314442	-0.245519	0.168232	-0.391734	-0.331134	-0.278817	-0.0253431	-0.0392116	-0.436708	-0.13125	-0.0299939	-0.286394	-0.0732336	-0.274862	-0.00470243	0.0727527	0.0785533	-0.306455	-0.237642	0.0240162	-0.236928
TC59	0.0875028	0.0309402	0.501892	0.384898	0.166845	0.458681	0.445124	0.870548	0.177555	0.182796	0.85475	0.490413	0.188384	0.172691	0.0616542	0.0718596	0.320068	0.0385032	0.468949	0.118362	0.394879	0.0453504	0.299084	0.0449835	0.238722	0.0829975	0.0737059	0.171716	0.314375	0.33247	-0.0309026	0.456424	0.679873	0.22024	0.494061	0.290609	0.754549	0.280082	0.294321	0.349305	0.248225	0.20214	0.477349	0.257817	0.286386	0.0744817	0.126995	0.412103	0.91206
TC73	-0.0204288	0.0797615	0.697097	-0.0719412	0.141094	0.0455246	0.000279283	0.135326	-0.049998	0.156666	-0.0434218	0.138004	-0.155995	0.197282	0.0793383	0.248292	-0.099567	0.194571	0.143885	0.29079	0.302801	0.00924163	0.052643	0.255988	0.101894	0.0912382	0.1706	0.17053	0.191281	0.176167	0.245788	0.0113642	0.443994	0.0740731	-0.0705954	0.179569	0.478498	-0.131642	0.351658	0.15716	0.15633	0.610319	0.23465	0.0862843	0.0629813	-0.153519	-0.0266354	-0.108902	0.0646724
TC93	-0.194694	-0.240999	-0.182121	-0.0566462	-0.255157	-0.155492	-0.76785	-0.400006	-0.140051	-0.291553	-0.410093	-0.0149467	-0.206693	-0.755109	-0.287727	-0.327247	-0.2688	-0.350277	-0.600931	-0.0980428	-0.402402	-0.750038	-0.412235	-0.660088	-0.013679	8.458e-05	-0.797938	-0.708529	-1.03817	-0.332007	-0.388643	-0.309805	-0.638388	0.019329	-0.506324	-0.263217	-0.0832263	-0.492018	-0.913963	-0.702009	-0.39366	-0.548092	-1.14054	-0.977379	0.0733361	-0.205126	-0.222141	-0.616633	-0.531611
TC100	0.0788886	0.337752	0.901269	0.843841	0.101421	0.587199	0.00903168	0.207384	0.496869	0.369467	0.20712	0.361115	0.2496	0.0576867	0.783127	0.176274	0.216451	0.382345	0.131847	0.538034	0.450188	0.112893	0.188848	0.684439	0.651047	0.565044	0.47631	0.14238	0.184366	0.300035	0.317529	0.301745	0.375015	0.696049	0.0318911	0.0286309	0.140606	0.292902	0.165284	0.690508	0.708096	0.396787	0.0876059	0.276639	0.443713	0.137749	0.565518	-0.00591067	0.319995
TC168	-0.066886	0.0283851	-0.0167461	0.0551769	-0.0379679	0.250392	0.121877	-0.0196858	0.133286	-0.133579	0.262823	-0.030692	0.186965	0.508499	0.196935	0.127089	-0.0303801	0.290657	0.212423	0.0163227	-0.0099328	0.550699	0.00103996	0.0898712	-0.182728	-0.0661602	-0.0186942	0.105641	0.0931673	-0.141366	0.102708	0.203638	-0.0512986	0.0803439	0.0623776	0.095458	-0.0176664	0.0807349	0.00110049	0.106983	-0.170814	0.123137	0.222884	0.247032	0.272936	-0.0440929	0.220254	0.244329	-0.0585822
TC190	0.458914	0.993908	0.522411	0.974309	0.581292	0.296592	0.203142	0.739722	0.845671	0.837651	0.499362	0.603748	0.65363	0.0727294	0.799775	0.276731	0.932974	0.272041	0.610366	-0.228193	0.17033	0.222877	0.207348	0.474727	0.794834	0.124357	0.677365	0.125421	0.309896	0.420967	0.255843	-0.120616	0.412492	0.675174	0.605447	-0.0480812	0.226966	0.419814	0.435561	0.243958	0.392812	0.373358	0.508981	0.0276916	0.470593	0.168633	0.0905909	0.534768	0.211296
TC299	0.0618434	0.440321	0.0364695	0.258493	0.116648	0.129092	-0.229511	0.290016	0.144479	0.273747	0.264866	0.320812	0.169086	-0.128539	0.205168	-0.0131002	0.641958	-0.0751207	0.163872	-0.171212	-0.386522	-0.0127168	0.00115678	0.0405294	0.196788	-0.0926983	0.0862334	-0.066966	0.0663631	0.113055	0.0677991	-0.219398	0.309222	0.11944	0.35354	-0.386538	0.277688	-0.0237728	0.0178959	-0.0244843	0.0619851	0.183875	0.200681	-0.201245	0.0112105	-0.0107514	-0.298661	-0.137252	0.263832
TC331	0.454409	0.415407	0.143163	1.09473	0.747485	0.737238	1.05538	0.74874	1.32537	0.457228	0.923495	0.667115	0.513394	0.246304	0.658661	1.16421	0.675467	0.068683	0.448009	0.821953	0.506662	0.832535	0.33351	0.284841	1.38545	0.0258739	0.705591	0.436339	0.319647	0.692048	0.542546	0.854259	1.28462	0.780865	0.975098	0.819644	0.605325	0.776724	0.337374	1.10663	1.0587	1.09122	1.66967	0.534467	0.250945	0.959025	0.34597	0.854281	0.276357
TC341	0.341881	0.997943	0.880247	0.714626	0.235992	1.0177	0.365126	0.595228	0.550312	0.272105	0.69798	1.52112	0.376787	0.41086	0.3607	0.510338	0.870253	1.2932	0.566288	0.483515	0.0964423	0.415212	0.0960006	0.453176	0.761832	0.938065	0.636979	0.560942	0.798633	-0.145645	0.982459	1.35634	0.407927	0.767107	0.404431	0.359496	0.910901	0.476061	0.462591	0.428164	0.254353	0.64351	0.45274	0.308561	0.892306	0.535629	0.281856	0.107583	0.612757
TC351	0.175747	0.033743	0.357366	-0.018576	-0.0524903	0.0677806	-0.00494781	0.00942814	0.150499	-0.164404	0.166894	0.0987195	-0.37152	-0.0144667	0.0237915	-0.282353	0.107365	-0.0941635	0.0466859	-0.359908	0.183677	-0.0181118	0.239526	-0.151985	-0.0920948	0.198847	0.0437578	-0.190826	0.0136224	0.0422303	0.159971	0.0733429	0.229697	0.105388	0.0150272	0.0681922	0.246692	-0.188352	0.109635	-0.0524	0.0187119	0.0606875	0.0443609	-0.14672	0.159818	0.131122	-4.73702e-06	-0.379103	0.163314
TC388	0.0988624	0.369525	0.0816348	1.04173	0.337823	0.288507	0.883207	0.79591	0.677458	0.590691	0.706517	0.707165	0.162944	0.084007	0.477888	0.998789	0.693583	-0.0213472	0.418035	0.582982	0.561891	0.727403	0.192997	0.199982	1.20588	0.166335	0.305564	0.227058	0.208617	0.441097	0.364842	0.829719	1.19361	0.438605	0.496961	0.753755	0.652476	0.499662	0.0955993	0.846867	0.534584	1.04437	0.894038	0.47772	0.192746	0.418825	0.331574	0.666605	0.199004
TC398	-0.147241	-0.234478	-0.229968	-0.0226772	0.0787737	-0.0473456	0.174999	0.0570456	-0.0907253	-0.209572	0.135887	-0.330151	0.129055	-1.17225	-0.0555734	-0.0939717	-0.110317	0.0548146	0.195043	0.0978421	-0.136941	-0.0186753	-0.16889	-0.229645	-0.0244386	-0.359127	-0.746521	-0.310363	-0.149806	-0.0181794	-0.041554	0.0906661	-0.112863	-0.478721	0.0112042	-0.343913	-0.430262	0.0354125	0.00366056	-0.210286	-0.0976427	-0.15635	0.181691	0.111955	0.145482	-0.0993108	-0.110241	0.415264	-0.0176847
TC499	-0.206429	0.0433712	-0.0716776	0.165859	-0.114109	-0.160255	-0.116741	-0.119973	-0.113121	-0.234684	-0.0201681	0.0305282	0.0130107	-1.00773	-0.353725	0.217293	0.106559	0.139446	0.0897036	-0.470847	-0.560425	-0.268641	-0.432832	-0.612081	-0.14134	-0.383982	-0.654483	-0.848507	-0.140249	-0.180385	-0.409873	-0.212302	-0.360595	-0.17677	-0.511289	-0.116621	-0.588497	-0.117733	-0.207429	-0.430846	-0.255282	-0.158862	-0.452913	-0.187669	-0.125493	-0.438363	-0.26914	-0.332631	-0.350186
TC525	-0.144381	-0.105156	-0.586317	-0.158761	-0.0808498	0.0569182	-0.0386599	0.13619	-0.201056	0.389563	-0.0463773	-0.0382946	-0.149429	-0.10555	-0.143175	-0.0753046	0.0333326	-0.131458	0.202446	-0.183085	-0.104848	0.0287832	-0.166109	-0.458223	-0.446666	-0.196614	-0.188889	0.0577918	-0.0479532	-0.0837602	-0.0713781	-0.155749	0.0583026	-0.127823	0.0445533	0.0206924	-0.152923	-0.0333685	0.112952	-0.352014	-0.120208	-0.213395	-0.00618382	-0.12242	-0.335705	0.136374	-0.105499	0.0800584	0.142953
TC551	0.30957	0.611925	0.21254	0.63534	0.560733	0.503395	0.152104	0.520584	0.476577	0.512456	0.3155	0.442602	0.691867	0.026919	0.490465	0.297291	0.618593	0.24696	0.644659	-0.0647655	-0.112335	0.262074	0.0382633	0.467917	0.437011	-0.0619769	0.299645	0.0851605	0.0355881	0.145617	0.0893363	0.00797083	0.289724	0.48642	0.741605	-0.20644	0.434857	0.19662	0.484638	0.036791	0.0992519	0.362795	0.256578	-0.0748052	0.228437	0.0212158	0.0040199	0.100454	0.447661
TC671	-0.775847	-0.574854	-0.34173	-0.745367	0.0680177	-0.432254	-0.388539	-0.778944	-0.354147	-0.035558	-0.374455	-0.545592	-0.771558	-0.175572	-0.0210668	-0.345367	-0.843091	-0.192429	-0.427198	-0.252588	-0.66834	-0.251584	-0.592599	-0.0289101	-0.5506	-0.207608	-0.444118	-0.236253	-0.992317	-0.497107	-0.935412	-0.661565	-0.345217	-0.0639778	-0.507012	-0.038783	-0.560252	-0.440253	-0.334223	-0.683421	-0.619475	-0.678492	-0.0155553	-0.359519	-0.556289	-0.682571	-0.412248	-0.323757	-0.781111
TC733	-0.0263112	-0.176281	-0.193344	-0.570066	-0.399348	-0.269546	-0.200284	-0.00506288	-0.444833	-0.719409	-0.0646979	-0.205605	-0.380416	0.2534	-0.648818	-0.727367	-0.120174	-0.395891	-0.197881	-0.341945	0.0289122	-0.332209	-0.328099	-0.105309	-0.0828487	-0.405704	-0.262904	-0.238706	-0.196971	-0.653057	-0.0760471	-0.219136	-0.0739238	-0.224765	-0.216093	-0.593691	-0.153625	-0.186073	-0.530128	-0.0283518	-0.549007	-0.044506	-0.174094	-0.299415	-0.576229	-0.0329617	-0.257023	-0.125631	0.0655034
TC734	-0.252383	-0.452862	-1.09465	-0.652847	-0.87231	-1.04142	-0.506009	-1.05477	-0.435011	-0.743041	-0.169739	-0.96689	-0.266313	-0.923247	-0.943978	-0.323458	-0.143367	-0.480902	-0.569977	-0.473301	-0.813051	-0.636243	-0.330177	-0.161761	-0.222645	-0.813047	-0.228483	-1.34885	-0.327785	-0.538911	-0.328004	-0.39931	-1.32873	-0.51839	-1.27669	-0.641261	-0.543367	-0.723402	-0.0955734	-0.820471	-0.749151	-0.200653	-0.294362	-0.366241	-0.793814	-0.289291	-1.46314	-0.351397	-1.65833
TC757	0.314387	-0.0310899	-0.047786	-0.380162	-0.0387922	-0.0280376	-0.232496	-0.0915274	0.136786	0.124053	-0.206512	0.246376	0.0827172	0.235412	0.00620341	0.262086	0.219498	0.0926577	-0.106167	0.0674477	0.21034	0.199747	0.184073	0.192823	0.376455	-0.0166922	0.261408	0.0102149	0.0930767	0.0144896	-0.277371	0.0665966	-0.30986	0.268976	-0.0698426	0.0467613	0.17501	0.213744	-0.129631	0.383453	0.734828	0.230382	-0.511584	-0.0643433	-0.206826	0.435699	-0.104953	0.0365609	0.0593858
TC785	0.417446	0.683785	0.609563	0.840431	0.12338	1.31114	0.414242	0.841071	0.571083	0.654794	1.39163	1.32206	0.306062	0.345375	0.47762	0.943697	1.20823	1.4345	0.714638	0.416697	0.653823	0.538372	0.665688	0.373833	0.698437	0.706389	0.396966	0.397195	0.275738	0.501076	0.512494	0.488617	0.579515	0.919285	0.186668	0.823209	0.54868	0.388932	0.321814	0.939529	0.18441	0.946631	0.294081	0.680931	0.285488	0.422045	0.224149	0.21384	0.363478
TC792	-0.105976	-0.0307908	-0.299502	-0.374969	-0.105312	-0.409391	0.0759412	-0.443501	-0.201389	-0.121697	-0.638677	-0.352253	-0.027481	-0.561485	-0.55227	-0.668109	-0.435323	-0.393215	0.032556	-0.0500468	-0.344531	-0.785117	-0.622057	-0.504994	-0.329634	-0.222095	-1.14249	-0.750331	-0.91282	-0.401501	-0.671862	-0.195732	-0.289285	-0.325925	-0.548758	-0.0220584	-0.635302	0.0699067	-0.681921	-0.437655	-0.291772	-0.490959	-0.293576	-0.455925	-0.0837161	-0.50326	0.0484856	-0.206754	-0.268193
TC793	0.0820968	0.294849	0.104123	0.0813503	0.147389	0.0822429	0.439715	-0.0224849	0.155858	0.0839723	-0.247749	0.160644	0.155292	-0.118271	-0.146603	-0.059667	-0.0565138	0.00896664	0.232914	0.0316109	-0.0770636	-0.212723	-0.329634	-0.275104	-0.0113798	-0.157524	-0.605059	-0.22656	-0.240574	-0.0867	-0.336508	0.139367	-0.078892	0.00519299	-0.282505	0.29515	-0.51001	0.549844	-0.221191	-0.199339	-0.0255103	-0.0204845	-0.163395	-0.0858345	0.132578	0.0612784	0.372819	0.011704	-0.0681325
TC807	-0.188324	0.0339915	0.0287967	0.0201205	-0.204793	-0.0144975	-0.0345895	-0.0619759	-0.264875	-0.177755	-0.0233434	0.16187	-0.080974	-0.9981	-0.29901	0.277914	0.0684937	0.192847	0.11705	-0.352043	-0.339066	-0.258635	-0.473664	-0.521562	-0.282087	-0.19596	-0.55513	-0.664145	0.034261	-0.0691188	-0.292701	-0.122478	-0.153697	-0.0518087	-0.302305	-0.133383	-0.316406	-0.15187	-0.122626	-0.260836	-0.151506	0.0152754	-0.488109	-0.11473	-0.083352	-0.221084	-0.0313656	-0.434487	-0.283918
TC822	0.201453	-0.273081	-0.340053	-0.384044	0.232646	-0.510194	-0.0132597	-0.471857	-0.0417689	-0.102905	-0.516451	-0.369255	-0.00838231	-0.0674987	-0.117177	-0.0787915	-0.206987	-0.767677	-0.071838	-0.311288	0.0826204	0.0471189	0.122857	0.123184	-0.0612248	-0.344644	0.0762317	0.121683	0.102224	0.277809	-0.104154	-0.0373194	0.0557287	0.0468389	0.397069	-0.0751499	-0.583787	0.0192724	0.0177585	0.0402672	-0.0257331	-0.209557	0.17645	0.114167	-0.139169	-0.0933527	0.0683768	0.160562	-0.0123152
TC849	-1.05408	-0.509114	-1.27547	-1.01708	-0.29811	-0.773929	-0.764404	-1.07455	-0.592895	-0.240574	-0.934464	-0.587971	-0.192136	-0.892983	-0.663073	-0.621869	-0.934669	-0.674822	-0.718295	-0.793272	-0.680209	-0.86962	-0.717042	-1.04111	-1.0973	-0.869227	-0.907676	-0.229931	-1.06626	-0.472608	-0.546592	-0.944356	-0.353074	-0.859159	-0.124422	-0.782678	-0.880705	-0.247697	-0.58348	-0.42958	-0.486989	-1.0786	-0.408445	-1.23186	-0.826243	-0.753003	-0.580163	-0.0721156	-0.562261
TC865	-1.93501	-0.678166	-0.373671	-0.64724	-0.760016	-0.213132	-0.426058	-0.374308	-1.21602	-1.21218	-1.02446	-0.40535	-1.04603	-1.14429	-0.245818	-0.717118	-1.53298	-0.808133	-0.469002	-1.08839	-0.817988	-1.03656	-1.57813	-0.466699	-0.882948	-0.53773	-1.91303	-0.425695	-0.630422	-0.748913	-1.6519	-0.693753	-0.909633	-0.296226	-0.677164	-1.16432	-0.801757	-0.948801	-0.815519	-0.805099	-0.894596	-0.887741	-0.73724	-0.640205	-0.384163	-1.14897	-0.384108	-1.43042	-0.937801
TC882	0.0115237	0.0976582	0.220184	-0.116707	0.0892224	0.0576564	0.0476131	0.215115	-0.00157951	0.677022	-0.0231307	0.112959	0.387332	0.0892074	0.323913	0.4826	0.292048	0.0105631	0.192986	0.668352	0.305513	0.287552	0.324691	0.292433	0.121644	-0.0868226	-0.237086	0.422682	0.132165	0.231219	0.237527	0.634611	0.241932	0.208131	0.120537	-0.137315	0.000356396	0.205196	0.16969	0.533911	0.609671	0.0506652	0.363119	0.059341	-0.102623	0.0639808	0.0204604	0.361553	-0.0206071
TC888	0.594226	0.260539	0.432838	0.284749	0.582433	0.161282	0.468243	-0.197814	0.351082	0.0616433	0.448189	0.132917	0.471195	-0.0283551	0.248287	0.288779	0.221018	-0.103581	0.594856	0.0667951	0.387035	-0.0566569	0.276005	0.177455	0.407448	0.247434	0.2379	0.0900612	0.0110513	0.618501	0.15956	0.0116761	0.0148744	0.340689	0.154694	0.261935	0.0963163	0.10174	0.343485	-0.250518	0.559825	0.176707	0.263738	0.106293	0.253375	0.37125	0.263336	0.250211	0.167397
TC918	-0.115018	-0.322497	-0.0162717	-0.690035	-0.301807	-0.537592	0.0510941	-0.103357	-0.0553824	-0.178602	-0.245127	-0.290571	-0.309532	-0.168433	-0.239344	-0.709991	-0.259292	-0.343397	0.0787998	-0.313423	0.199105	-0.194182	-0.0977427	-0.155016	-0.160642	-0.41585	-0.154978	-0.481785	-0.0806329	-0.241716	-0.441579	0.0162904	-0.452034	-0.0845799	-0.179306	-0.682626	-0.159743	-0.258022	-0.44063	0.158237	-0.745081	-0.197336	-0.267185	-1.06736	-0.048273	0.0396411	-0.562054	-1.07506	-0.126267
TC920	-1.1642	-0.692067	-0.661737	-0.861008	-0.0619162	-0.702491	-0.698752	-0.720016	-0.50093	-0.600439	-0.799323	-0.79035	-1.15284	-0.930829	-0.301909	-0.664047	-1.02438	-0.914459	-1.02942	-0.712953	-0.635567	-0.738435	-1.13936	-0.536454	-0.711951	-0.677278	-0.672305	-0.588416	-1.28601	-0.556562	-1.16305	-1.05635	-0.548157	-0.277185	-0.857932	-0.538742	-0.864645	-0.954735	-0.706273	-0.664156	-0.551531	-0.428276	-0.171309	-0.756953	-0.868744	-1.46034	-0.338763	-0.692897	-1.1
TC921	-0.113747	0.156146	0.397386	0.259919	0.371214	0.142334	0.531562	0.235082	-0.0274678	0.408661	0.265632	0.0221842	0.407556	-0.0196243	0.671075	0.421552	0.0449134	0.361805	0.642498	0.254506	-0.0854063	0.0907973	0.150381	0.249024	-0.243514	0.100377	-0.0388373	0.0736043	0.118684	0.456442	0.269048	0.343292	0.317887	-0.100181	0.470398	0.328798	-0.0191268	0.378279	0.0286001	0.118644	0.178629	-0.271609	0.308788	0.253209	0.574476	-0.127199	0.334522	0.160649	-0.0196598
TC943	0.457623	0.453253	0.273977	0.263323	0.250813	0.351069	0.581201	0.772243	0.508934	0.590891	0.795231	0.641084	0.337004	1.46181	0.527442	0.622357	0.701622	0.234401	0.286964	0.498136	0.44234	0.722091	0.479512	0.689473	0.262268	1.36993	0.374847	1.08297	0.316679	0.370747	0.514839	0.531599	0.583767	0.981152	0.369169	0.803959	0.445266	0.495463	0.208461	0.648326	0.145872	0.241684	0.759229	0.857314	0.07051	0.327168	0.423254	0.476598	0.85778
TC944	0.269584	0.685627	0.409557	0.683279	0.0852063	0.482121	0.57031	0.0532382	0.382645	0.402357	0.0194315	0.518559	0.42495	0.463891	0.398083	1.55598	0.47067	0.563145	0.527962	0.127208	0.117958	-0.0111273	0.000847178	0.3189	0.235908	0.0615609	0.284033	0.371593	0.266151	0.110076	0.523833	0.425281	0.0312419	0.334868	-0.0420048	0.433003	0.151243	0.0448316	0.0409329	0.142685	0.441712	0.675547	0.0526022	0.488553	-0.100379	0.16605	0.252203	-0.00720807	0.400583
TC959	0.629151	0.46733	0.673021	1.04535	0.138425	1.13636	0.849148	0.646084	1.02005	0.539667	0.343332	0.754475	0.65093	0.495392	0.65754	0.60995	0.329198	1.05043	0.497519	0.382615	0.94577	0.696503	0.634727	0.751027	0.902174	0.64145	0.911451	0.381237	0.294562	0.640159	0.928351	0.972375	0.62939	1.37647	0.15449	0.960975	0.315002	0.295533	0.466174	0.725083	0.522381	0.997311	0.523365	0.509906	0.763725	0.327982	0.186821	0.240057	0.174298
TC976	-0.192717	-0.254518	-0.0925214	-0.209521	0.213516	-0.271836	-0.800056	-0.119644	-0.336627	-0.194008	0.243187	-0.0152156	-0.218669	-0.0374246	-0.0680572	-0.238064	0.0208934	-0.12148	-0.627308	0.0713799	-0.0779843	-0.248879	-0.282904	-0.0907452	0.0790513	-0.0594578	-0.43251	-0.0897336	-0.0782129	-0.251764	-0.149214	-0.00478717	-0.22852	-0.105102	-0.534497	-0.0371606	0.0479386	-0.270962	-0.256486	-0.0432343	-0.428196	-0.35282	-0.261497	-0.23001	-0.319265	-0.435203	-0.27694	-0.282151	-0.362712
TC977	-0.433884	-0.177798	-0.739971	-0.576065	-0.0507695	-0.701984	-0.432584	-1.47639	-0.409374	-0.811049	-0.356684	-0.555907	-0.0734176	-0.543861	-0.952764	-0.682366	-0.170812	-0.785771	-0.760356	-0.415976	-0.824436	-1.48568	-0.683846	-0.348278	-0.281562	-0.60201	-0.783135	-0.331703	-0.119257	-0.545428	-0.412573	-0.409788	-0.912692	-0.493073	-0.409337	-0.554082	-0.511592	-0.290174	-0.701604	-0.614117	-0.342755	-0.901294	-0.124636	-0.0926076	-0.373247	-0.682638	-0.430291	-0.0748742	-0.439874
TC1041	0.0125296	-0.015741	-0.0306764	0.570252	-0.270028	0.104112	0.286678	0.179871	-0.363961	0.118372	-0.209465	-0.176372	0.104209	-0.183623	0.101522	-0.0750306	-0.114935	-0.0123929	0.112769	-0.151101	-0.0794771	0.105232	-0.15612	0.0848956	-0.146286	-0.129053	-0.179901	0.0645541	-0.156358	-0.137737	-0.0543924	0.0276225	-0.0981676	-0.29935	0.257407	-0.00476266	-0.349	0.329009	0.131656	-0.214085	0.051977	-0.502439	0.0274301	-0.185953	0.255428	0.0328289	0.554982	-0.0912024	-0.135786
TC1052	0.514881	0.294663	1.2208	0.564737	0.268654	0.162994	0.00809106	1.1623	0.117918	0.554904	0.316807	0.154775	0.588464	0.0799545	0.181238	0.485289	0.533689	0.205537	0.0517178	0.584491	0.384572	0.41251	0.456088	0.0714303	0.386882	0.289194	0.10129	0.685926	0.40595	0.638652	0.0984927	0.0480713	0.598553	0.171321	0.588457	0.278625	0.432711	0.341356	0.0665164	0.618639	0.203731	0.280566	0.201667	0.0461398	0.563305	0.305537	0.503561	0.22667	0.741583
TC1057	0.891931	1.05725	0.726242	0.531581	0.825625	0.531805	0.645302	0.20923	0.684517	0.306842	1.31154	0.686639	0.621938	0.256934	0.565208	0.401522	0.99845	0.125438	0.721473	0.619384	0.47992	0.219232	0.530323	0.572194	0.862527	1.00762	0.453243	0.457017	0.488356	0.615153	0.607395	0.5872	0.20192	0.821772	0.285106	0.692238	0.366824	0.491127	0.588119	0.00263301	0.566783	0.319963	0.68022	0.502249	0.709592	0.864269	0.620878	0.458722	0.786215
TC1093	-1.07116	-0.399392	-0.258959	-0.668651	-0.180684	0.0827244	-0.766895	-0.214607	-0.900668	-0.340635	-0.956274	-0.283242	-0.0975545	-0.391423	-0.63615	0.0196525	-0.574498	0.0430791	-0.885307	-0.595198	-1.27906	-0.209948	-0.600993	-0.471578	-0.338373	-0.265027	-0.680076	-0.40191	-0.697592	-0.782965	-0.45061	-0.465613	-0.368883	-0.211853	-0.272172	-0.261521	-0.904137	-0.366233	-0.805325	-0.268822	-0.347452	-0.410005	-0.138782	-0.530943	-0.310672	-0.37245	-0.00511702	-0.267954	-0.459492
TC1099	0.462198	0.236748	1.40129	-0.0682675	0.886732	0.395311	0.133985	0.174081	0.200255	1.03045	0.141361	1.02942	0.318457	0.870375	0.711828	0.524873	0.376402	0.617575	0.679518	0.442495	0.99575	0.311925	0.347258	0.67303	0.504747	0.888201	0.43486	1.17618	0.459343	0.607362	0.289617	0.310177	0.395698	1.76603	0.494074	0.716481	0.643443	0.561653	0.266435	0.317764	0.330557	0.575382	0.34884	0.375571	0.333764	0.515217	1.14909	0.25778	0.79962
TC1109	0.135317	0.0122767	0.132637	-0.00774212	-0.267154	-0.0200931	-0.0989848	0.577223	0.271023	0.00391685	0.229523	0.36632	-0.0555982	0.555289	-0.16042	0.0867756	0.554749	0.105643	0.295192	-0.23759	0.025032	0.333679	-0.0911864	-0.0213278	0.31444	0.245859	0.0141811	0.100406	0.0261464	0.217	0.0852819	0.0261188	0.0984983	0.526602	0.0178485	-0.37516	0.311188	-0.0940658	-0.0814285	-0.248886	-0.283123	0.252333	-0.127083	0.20092	-0.0774682	0.299818	-0.0586186	0.235281	0.313268
TC1125	1.46794	0.852576	1.05512	1.147	1.17967	0.482374	1.0146	0.541065	1.52237	0.857226	1.66529	0.889254	0.740549	1.80242	1.45889	0.72584	1.00168	0.140322	1.13465	1.08595	1.4337	1.00407	1.22506	1.0001	1.22226	0.992776	1.36342	1.5796	1.55585	1.9785	1.06277	0.752314	0.803068	0.907618	0.630067	1.21597	1.01027	1.11845	0.8688	0.883665	1.24585	0.707883	0.946345	0.68472	0.671858	1.27571	0.733843	0.487223	0.918587
TC1127	0.33341	0.193197	0.448535	-0.310332	0.489358	-0.391677	-0.0723707	0.244028	0.284375	0.0124383	-0.179517	0.334746	-0.0139723	0.18741	-0.0644469	-0.070173	-0.0217543	-0.19132	-0.197299	0.274261	0.669048	0.0637695	0.134941	0.00755249	0.115901	0.152055	-0.111399	0.170687	-0.255399	0.00951068	-0.282703	-0.0165177	0.039414	0.176677	-0.393627	0.34867	-0.192531	0.353354	-0.0248307	0.18533	0.076404	0.283952	0.0238711	0.117518	0.145677	-0.0541835	0.545739	0.203463	0.401674
TC1148	-0.156167	-0.0411097	-0.114577	-0.181896	0.00592148	0.0190224	-0.135133	-0.424381	-0.466704	-0.258794	0.0524092	-0.365314	-0.182521	-0.226554	-0.0523637	-0.654541	-0.139365	-0.664258	-0.191509	-0.0360401	-0.466223	-0.127656	-0.248312	-0.647312	-0.354797	-0.35222	-0.673811	-0.264854	-0.259947	-0.235007	-0.878941	-0.201781	-0.161312	-0.231802	0.136402	-0.189758	-0.00865599	-0.728411	-0.433391	-0.787326	-0.00538917	-0.605874	-0.0886348	-0.405644	-0.427061	-0.405338	-0.0515956	-0.368783	-0.112531
TC1151	-0.34566	-0.228125	-0.73719	-0.634608	-0.395389	-0.619179	-0.0816101	-1.10233	-0.764673	-1.15799	-0.652859	-0.735195	-0.537591	-0.316773	-0.472894	-0.366278	-0.577396	-0.663658	-0.184239	-1.13211	-0.745219	-0.975782	-0.66084	-0.762739	-1.14461	-0.687754	-1.11452	-0.300541	-0.390494	-0.64582	-0.901824	-0.651132	-0.335622	-0.642907	-0.317204	-0.0521937	-0.6376	-0.466321	-0.82227	-0.608999	-0.193266	-0.41738	-1.10383	-0.476846	-0.356017	-0.768486	-0.701352	-0.563712	-0.351937
TC1154	-0.0156713	-0.563738	0.034051	-0.956934	-0.421093	-0.915233	-0.00295549	-0.626908	-0.399344	-0.432842	-0.434628	-0.534396	-0.498822	-0.191846	-0.324494	-0.927548	-0.627777	-0.202298	-0.0752269	-0.588181	0.0660188	-0.388169	-0.17578	-0.25604	-0.33358	-0.511773	-0.176786	-0.807308	-0.191445	-0.3122	-0.831228	-0.0251111	-0.741242	-0.315223	-0.391677	-0.731377	-0.241321	-0.373339	-0.61829	0.0458376	-0.807991	-0.185865	-0.519462	-1.86467	-0.317313	-0.226669	-0.943411	-1.91076	-0.440913
TC1166	-0.804992	-0.46322	-0.476188	-0.420524	-0.719634	-0.528757	-0.934308	-0.380325	-1.18213	-0.606188	-0.668587	-0.468679	-0.547712	-0.170793	-0.359842	-0.487446	-0.250002	-0.230782	-0.600966	-0.81709	-1.07754	-0.7157	-0.183265	-0.64386	-0.805214	-0.595783	-1.02591	-0.309564	-0.337878	-0.25247	-1.31381	-0.64036	-0.744233	-1.22332	-0.452644	-0.991595	-0.718624	-0.611351	-0.792296	-0.137184	-0.308452	-0.999212	-0.33558	-0.162426	-0.816963	-0.857774	-0.729467	-0.520867	-0.374848
TC1170	0.179539	0.0384865	0.0144834	-0.0102262	0.633428	0.0531302	0.233959	-0.128962	0.122614	0.195071	7.1006e-05	-0.179292	0.395148	0.426609	0.275596	-0.110836	-0.116892	-0.173298	0.117947	0.207273	0.244971	0.523287	0.257612	0.323275	0.061254	-0.0305159	0.336119	0.286975	0.0612776	0.225135	0.116197	0.00841847	0.0938828	0.132541	0.54994	-0.08724	-0.0942364	0.266794	0.203033	0.085101	0.110901	-0.129857	0.686627	0.118225	0.0352446	0.136659	0.2097	0.472994	0.262102
TC1174	-0.16146	-0.135865	-0.0238415	-0.137812	0.0206316	-0.0956219	0.00826928	-0.0628712	0.329571	-0.00589483	-0.15142	-0.045704	-0.336853	0.28394	0.047754	0.0584441	-0.0511259	-0.0352019	-0.329533	0.0277034	0.295487	-0.215959	0.159572	0.256577	0.0110102	0.135617	0.287745	-0.139136	-0.163972	0.278654	-0.196674	-0.377958	-0.238771	0.154653	-0.100316	-0.281208	0.130058	0.241533	0.335321	0.493837	0.240704	0.240304	-0.167495	0.277609	0.117093	-0.0176676	0.448551	0.0595662	0.00334857
TC1175	-0.481215	-0.366625	-0.678036	-0.564688	-0.452341	0.127926	-0.0408533	-0.0286076	-0.363781	-0.394874	-1.81002	-0.909599	-0.511132	-0.128621	0.0420719	-0.567136	-1.25281	-0.203297	-0.381389	-0.57424	-0.280594	-0.100565	-0.237416	-0.519476	-0.608978	-0.845988	-1.02606	-0.287126	-0.910316	-0.471207	-0.930571	-0.611198	-0.0758232	-0.6917	-0.121529	-0.613165	-0.439576	-0.796513	-0.370038	-0.369656	-0.567777	-0.349139	-0.257874	-0.237157	-0.42838	-0.709363	-0.391449	-0.186743	-0.261083
TC1184	0.107479	0.602722	0.807494	0.270631	0.292711	0.382198	0.436915	0.769001	0.238492	0.576793	0.319422	0.574531	-0.180716	0.398265	0.700967	0.163527	0.277396	0.244496	0.378393	0.964046	0.585944	0.403399	1.04967	0.401999	0.049426	0.704253	0.296342	0.198572	0.573627	0.496229	0.62338	0.246429	0.758718	0.112771	0.703172	0.258461	0.0327801	0.385126	0.0755562	1.07494	0.529567	0.281583	0.207257	0.226214	0.193386	0.556991	0.382524	-0.127758	0.49745
TC1187	-0.165692	0.173628	-0.24448	-0.067653	-0.157679	-0.254178	0.180261	-0.602163	-0.248041	-0.0694149	-0.0369407	-0.579451	0.228536	-0.631035	-0.119732	0.0944986	-0.192627	-0.0470055	-0.0393336	-0.164758	-0.396434	-0.208015	0.25704	-0.390134	-0.160712	-0.749423	-0.199624	-0.397058	-0.276456	-0.285265	-0.0355647	-0.127705	-0.343952	-0.296273	-0.0909002	-0.102467	-0.309056	-0.1377	-0.144586	-0.179951	-0.207308	-0.601531	0.198379	-0.0185022	-0.178979	-0.229759	-0.138965	0.107865	-0.662316
TC1189	-0.218381	-0.0957211	-0.309085	0.159683	-0.142123	-0.305989	0.0238274	0.0753251	-0.0401653	0.0134045	0.0734928	0.0126891	-0.347945	-0.353391	0.069398	0.103446	0.0300692	-0.727768	-0.116054	-0.314443	-0.0680731	-0.0420553	-0.275318	-0.048544	0.108113	-0.426931	-0.113428	-0.296977	-0.148304	-0.265318	-0.0189893	-0.0299216	0.0653543	-0.0226673	0.157217	-0.0497906	0.0445423	-0.0511808	-0.276422	-0.102434	-0.175829	0.10936	0.0931542	-0.138636	-0.213534	-0.0129593	-0.113807	-0.0734642	-0.14618
TC1210	0.67248	-0.0361792	0.183308	0.664873	-0.0254576	0.247072	0.196351	-0.0586856	0.0922398	0.484659	-0.04299	0.088634	0.750958	0.125521	0.0848821	0.650628	0.125047	0.154687	-0.250039	0.207413	0.35619	0.289138	0.0103247	0.463117	0.653252	0.399023	0.207766	0.260628	0.108521	0.29249	0.0827685	0.290258	-0.15787	0.486774	-0.148889	0.346559	-0.121728	-0.0669361	0.516578	0.0940629	0.668782	0.0953916	0.210563	0.230861	0.374946	0.217079	-0.0151886	0.140441	0.115109
TC1214	0.406433	0.3548	0.28581	0.557703	0.663489	-0.0925738	0.428572	-0.138225	0.186831	0.168556	0.41408	0.233509	0.412446	0.187811	0.671608	0.294184	-0.0812636	0.107654	0.20164	-0.151387	0.485415	-0.196505	0.22132	0.293206	0.0783089	-0.116233	0.755461	0.108149	0.283094	0.126458	0.029392	0.110154	0.0626579	-0.124384	-0.278461	0.15437	0.0646238	0.220876	0.861528	-0.0684817	0.462433	-0.115475	0.0439855	0.1464	-0.127798	-0.234727	-0.0129466	0.150174	0.0468499
TC1224	-0.981231	-0.161669	0.21341	-0.737304	0.0931954	-0.527993	-0.292096	-0.602387	-0.508785	-0.566109	-0.728251	0.272058	-0.516427	-0.717883	-0.331893	-0.160259	-0.434093	-0.421329	-0.23831	-0.379181	0.0639237	-0.839132	-0.522352	-0.466478	-0.265902	-0.519644	-0.569035	-0.218408	-0.394233	-0.138614	-0.311517	-0.223	-0.416778	0.044984	-0.125441	-0.622804	-0.359121	-0.0510418	-0.0906571	-0.39468	-0.11799	0.00180979	-0.239756	-0.0713622	-0.497404	-0.128595	-0.00545311	-0.341121	-0.0195722
TC1225	1.64986	1.32801	0.883769	0.880393	1.05782	1.06056	0.679964	0.752185	1.50573	1.75053	0.966966	0.924586	0.744611	1.78844	1.15168	1.61845	1.33561	1.23992	1.06422	0.717227	1.48686	1.13296	1.34349	1.22867	1.27971	0.7051	1.3766	1.05991	1.29498	0.789929	1.12151	1.0131	1.18722	1.02891	0.762848	1.49015	0.783756	1.35491	1.1546	2.13143	0.760642	1.94796	0.924895	0.485151	1.06697	1.63163	1.62932	0.676192	0.603037
TC1238	-1.91781	-1.49687	-1.57928	-2.19147	-1.37035	-1.12045	-1.0017	-0.95268	-1.33695	-1.10302	-2.15482	-1.55352	-1.2185	-0.962995	-0.955557	-0.974226	-1.32821	-1.50848	-1.43807	-1.22314	-1.55622	-0.913157	-1.25094	-0.886632	-1.2426	-0.84549	-0.792447	-0.806996	-1.84662	-2.13189	-0.997556	-1.36223	-0.940754	-0.561609	-1.33564	-1.70317	-1.35024	-1.72304	-1.07136	-1.29651	-1.36635	-1.11003	-0.858358	-1.15202	-1.7402	-1.17868	-0.871518	-1.2407	-1.63604
TC1257	0.096042	0.0732839	-0.246941	0.0909239	-0.127106	-0.204431	0.0493968	0.0165247	0.562	-0.00346506	0.00360611	0.0118477	-0.231504	0.539356	-0.151893	0.169758	0.0310383	-0.025608	-0.0902775	0.0689253	-0.0223244	0.0904903	0.097773	0.696339	0.151855	-0.0495233	0.42807	-0.0247187	0.0891692	-0.278766	-0.0630312	0.00228395	0.0837814	-0.102974	0.0429784	-0.12345	-0.11168	0.0803533	-0.126587	0.183376	0.229518	0.235906	0.2107	-0.0872368	0.3516	0.0810294	-0.173594	-0.0974755	-0.287493
[truncated: 952 more columns]

[truncated: 7 more sheets: Robustness resp multi (SF5), Robustness PFS uni (SF5), Robustness PFS multi (SF5), Robustness OS uni (SF5), Robustness OS multi (SF5), Singlecell blood (SF6),  Singlecell bone (SF6)]
